# Supplementary material for: Reactions in silicon–nitrogen plasma
Source: Royal Society of Chemistry journal article supplement (doi:10.1039/c6cp05395e), 2016-12-21
Supplement: c6cp05395e4.pdf [file c6cp05395e4.pdf]

## Supplement 4: Relative enthalpies and Gibbs free energies

Table 1: Relative enthalpies of reactants ( $\Delta H_r$ ) pre-reaction complexes( $\Delta H_{pk1}$ ), transition states (reaction barrier,  $\Delta H^\ddagger$ ), post-reaction complexes ( $\Delta H_{pk2}$ ) and products ( $\Delta H_p$ ) for reactions in silane–ammonia plasma at 200 K. All enthalpies are calculated with MP2/aug-cc-pVTZ//CASPT2/aug-cc-pVTZ method and vibrational contribution to enthalpy is calculated with MP2/aug-cc-pVTZ. Enthalpies are shown relative to reactants.

| reaction                                                                                                                    | $\Delta H_r/\text{eV}$ | $\Delta H_{pk1}/\text{eV}$ | $\Delta H^\ddagger/\text{eV}$ | $\Delta H_{pk2}/\text{eV}$ | $\Delta H_p/\text{eV}$ |
|-----------------------------------------------------------------------------------------------------------------------------|------------------------|----------------------------|-------------------------------|----------------------------|------------------------|
| $\text{NH}_3 + \text{SiH}_4 \longrightarrow \text{SiH}_3\text{NH}_2 + \text{H}_2$                                           | 0.0                    | -0.02                      | 1.77                          | -0.48                      | -0.47                  |
| $\text{NH}_3 + \text{SiH}_3\text{NH}_2 \longrightarrow \text{SiH}_2(\text{NH}_2)_2 + \text{H}_2$                            | 0.0                    | -0.12                      | 1.37                          | -0.73                      | -0.71                  |
| $\text{NH}_3 + \text{SiH}_2(\text{NH}_2)_2 \longrightarrow \text{SiH}(\text{NH}_2)_3 + \text{H}_2$                          | 0.0                    | -0.17                      | 1.67                          | -0.78                      | -0.77                  |
| $\text{NH}_3 + \text{SiH}(\text{NH}_2)_3 \longrightarrow \text{Si}(\text{NH}_2)_4 + \text{H}_2$                             | 0.0                    | -0.14                      | 1.66                          | -0.85                      | -0.82                  |
| $\text{SiH}_4 + \text{NH}_2\text{SiH}_3 \longrightarrow (\text{SiH}_3)_2\text{NH} + \text{H}_2$                             | 0.0                    | -0.12                      | 1.70                          | -0.64                      | -0.61                  |
| $\text{SiH}_4 + (\text{SiH}_3)_2\text{NH} \longrightarrow (\text{SiH}_3)_3\text{N} + \text{H}_2$                            | 0.0                    | -0.17                      | 1.67                          | -0.74                      | -0.70                  |
| $\text{SiH}_3\text{NH}_2 + (\text{NH}_2)_3\text{SiH} \longrightarrow \text{SiH}_3\text{-NH-Si}(\text{NH}_2)_3 + \text{H}_2$ | 0.0                    | -0.21                      | 1.67                          | -0.92                      | -0.89                  |
| $\text{SiH}_3\text{NH}_2 \longrightarrow \text{SiH}\text{NH}_2 + \text{H}_2$                                                | 0.0                    | -                          | 2.59                          | 1.60                       | 1.61                   |
| $\text{SiH}_2(\text{NH}_2)_2 \longrightarrow \text{Si}(\text{NH}_2)_2 + \text{H}_2$                                         | 0.0                    | -                          | 3.01                          | 1.22                       | 1.23                   |
| $\text{NH}_2 + \text{SiH}_3 \longrightarrow \text{SiH}_3\text{NH}_2$                                                        | 0.0                    | -                          | -                             | -                          | -4.57                  |
| $\text{NH}_2 + \text{SiH}_2\text{NH}_2 \longrightarrow \text{SiH}_2(\text{NH}_2)_2$                                         | 0.0                    | -                          | -                             | -                          | -4.88                  |
| $\text{NH}_2 + \text{SiH}(\text{NH}_2)_2 \longrightarrow \text{SiH}(\text{NH}_2)_3$                                         | 0.0                    | -                          | -                             | -                          | -5.04                  |
| $\text{NH}_2 + \text{Si}(\text{NH}_2)_3 \longrightarrow \text{Si}(\text{NH}_2)_4$                                           | 0.0                    | -                          | -                             | -                          | -5.15                  |
| $\text{SiH}_3 + \text{SiH}_3\text{NH} \longrightarrow (\text{SiH}_3)_2\text{NH}$                                            | 0.0                    | -                          | -                             | -                          | -4.96                  |
| $\text{SiH}_3 + (\text{SiH}_3)_2\text{N} \longrightarrow (\text{SiH}_3)_3\text{N}$                                          | 0.0                    | -                          | -                             | -                          | -5.67                  |
| $\text{SiH}_3 + \text{NH}_3 \longrightarrow \text{SiH}_3\text{NH}_3$                                                        | 0.0                    | -0.07                      | 0.00                          | -                          | 0.45                   |
| $\text{NH}_2\text{SiH}_2 + \text{NH}_3 \longrightarrow \text{NH}_2\text{SiH}_2\text{NH}_3$                                  | 0.0                    | -0.09                      | 0.44                          | -                          | 0.30                   |
| $(\text{NH}_2)_2\text{SiH} + \text{NH}_3 \longrightarrow (\text{NH}_2)_2\text{SiH}\text{NH}_3$                              | 0.0                    | -0.15                      | 0.42                          | -                          | 0.14                   |
| $\text{NH}_3\text{SiH}_3 \longrightarrow \text{NH}_2\text{SiH}_3 + \text{H}$                                                | 0.0                    | -                          | 0.27                          | -0.36                      | -0.32                  |
| $\text{NH}_2\text{SiH}_2\text{NH}_3 \longrightarrow (\text{NH}_2)_2\text{SiH}_2 + \text{H}$                                 | 0.0                    | -                          | 0.18                          | -0.52                      | -0.48                  |
| $(\text{NH}_2)_2\text{SiH}\text{NH}_3 \longrightarrow (\text{NH}_2)_3\text{SiH} + \text{H}$                                 | 0.0                    | -                          | 0.11                          | -0.56                      | -0.52                  |
| $(\text{NH}_2)_3\text{SiNH}_3 \longrightarrow (\text{NH}_2)_4\text{Si} + \text{H}$                                          | 0.0                    | -                          | 0.12                          | -0.44                      | -0.42                  |
| $\text{SiH}_2 + \text{NH}_3 \longrightarrow \text{SiH}_2\text{-NH}_3$                                                       | 0.0                    | -                          | -                             | -                          | -1.17                  |
| $\text{SiH}_2 + \text{NH}_2\text{SiH}_3 \longrightarrow \text{SiH}_2\text{-NH}_2\text{SiH}_3$                               | 0.0                    | -                          | -                             | -                          | -1.13                  |
| $\text{SiH}_2 + \text{NH}(\text{SiH}_3)_2 \longrightarrow \text{SiH}_2\text{-NH}(\text{SiH}_3)_2$                           | 0.0                    | -                          | -                             | -                          | -1.02                  |
| $\text{SiH}_2\text{-NH}_3 + \text{NH}_3 \longrightarrow \text{NH}_3\text{-SiH}_2\text{-NH}_3$                               | 0.0                    | -0.05                      | -                             | -                          | -0.16                  |
| $\text{SiH}_2\text{-NH}_3 \longrightarrow \text{SiH}_3\text{NH}_2$                                                          | 0.0                    | -                          | 1.44                          | -                          | -1.73                  |
| $\text{SiH}_2\text{-NH}_2\text{SiH}_3 \longrightarrow \text{NH}(\text{SiH}_3)_2$                                            | 0.0                    | -                          | 1.24                          | -                          | -1.94                  |
| $\text{SiH}_2\text{-NH}(\text{SiH}_3)_2 \longrightarrow \text{N}(\text{SiH}_3)_3$                                           | 0.0                    | -                          | 1.03                          | -                          | -2.06                  |
| $\text{NH}_2 + \text{SiH}_4 \longrightarrow \text{NH}_2\text{SiH}_3 + \text{H}$                                             | 0.0                    | -0.09                      | 0.21                          | -0.59                      | -0.57                  |
| $\text{NH}_2 + \text{NH}_2\text{SiH}_3 \longrightarrow (\text{NH}_2)_2\text{SiH}_2 + \text{H}$                              | 0.0                    | -0.16                      | -0.04                         | -0.83                      | -0.81                  |
| $\text{NH}_2 + (\text{NH}_2)_2\text{SiH}_2 \longrightarrow (\text{NH}_2)_3\text{SiH} + \text{H}$                            | 0.0                    | -0.26                      | -0.10                         | -0.92                      | -0.98                  |
| $\text{NH}_2 + (\text{NH}_2)_3\text{SiH} \longrightarrow (\text{NH}_2)_4\text{Si} + \text{H}$                               | 0.0                    | -0.13                      | 0.02                          | -0.99                      | -0.97                  |
| $\text{SiH}_3 + \text{SiH}_4 \longrightarrow \text{SiH}_4 + \text{SiH}_3$                                                   | 0.0                    | -0.09                      | 0.29                          | -0.09                      | 0.00                   |
| $\text{SiH}_3 + \text{NH}_2\text{SiH}_3 \longrightarrow \text{NH}_2\text{SiH}_2 + \text{SiH}_4$                             | 0.0                    | -0.08                      | 0.32                          | -0.09                      | -0.00                  |
| $\text{SiH}_3 + (\text{NH}_2)_2\text{SiH}_2 \longrightarrow (\text{NH}_2)_2\text{SiH} + \text{SiH}_4$                       | 0.0                    | -0.14                      | 0.31                          | -0.04                      | 0.06                   |
| $\text{SiH}_3 + (\text{NH}_2)_3\text{SiH} \longrightarrow (\text{NH}_2)_3\text{Si} + \text{SiH}_4$                          | 0.0                    | -0.09                      | 0.45                          | 0.12                       | 0.18                   |
| $\text{NH}_2 + \text{SiH}_4 \longrightarrow \text{SiH}_3 + \text{NH}_3$                                                     | 0.0                    | -0.09                      | 0.21                          | -0.64                      | -0.63                  |
| $\text{NH}_2 + \text{NH}_2\text{SiH}_3 \longrightarrow \text{NH}_2\text{SiH}_2 + \text{NH}_3$                               | 0.0                    | 0.01                       | 0.22                          | -0.80                      | -0.65                  |
| $\text{NH}_2 + (\text{NH}_2)_2\text{SiH}_2 \longrightarrow (\text{NH}_2)_2\text{SiH} + \text{NH}_3$                         | 0.0                    | -0.13                      | 0.21                          | -0.69                      | -0.54                  |
| $\text{NH}_2 + (\text{NH}_2)_3\text{SiH} \longrightarrow (\text{NH}_2)_3\text{Si} + \text{NH}_3$                            | 0.0                    | -0.12                      | 0.18                          | -0.56                      | -0.43                  |
| $\text{SiH}_4 + \text{H} \longrightarrow \text{SiH}_3 + \text{H}_2$                                                         | 0.0                    | -0.03                      | 0.19                          | -0.49                      | -0.45                  |
| $\text{NH}_2\text{SiH}_3 + \text{H} \longrightarrow \text{NH}_2\text{SiH}_2 + \text{H}_2$                                   | 0.0                    | -0.03                      | 0.10                          | -0.50                      | -0.44                  |
| $(\text{NH}_2)_2\text{SiH}_2 + \text{H} \longrightarrow (\text{NH}_2)_2\text{SiH} + \text{H}_2$                             | 0.0                    | -0.03                      | 0.21                          | -0.42                      | -0.37                  |
| $(\text{NH}_2)_3\text{SiH} + \text{H} \longrightarrow (\text{NH}_2)_3\text{Si} + \text{H}_2$                                | 0.0                    | -0.04                      | 0.19                          | -0.31                      | -0.25                  |

Table 2: Relative enthalpies of reactants ( $\Delta H_r$ ) pre-reaction complexes( $\Delta H_{pk1}$ ), transition states (reaction barrier,  $\Delta H^\ddagger$ ), post-reaction complexes ( $\Delta H_{pk2}$ ) and products ( $\Delta H_p$ ) for reactions in silane–ammonia plasma at 250 K. All enthalpies are calculated with MP2/aug-cc-pVTZ//CASPT2/aug-cc-pVTZ method and vibrational contribution to enthalpy is calculated with MP2/aug-cc-pVTZ. Enthalpies are shown relative to reactants.

| reaction                                                                                                                    | $\Delta H_r/\text{eV}$ | $\Delta H_{pk1}/\text{eV}$ | $\Delta H^\ddagger/\text{eV}$ | $\Delta H_{pk2}/\text{eV}$ | $\Delta H_p/\text{eV}$ |
|-----------------------------------------------------------------------------------------------------------------------------|------------------------|----------------------------|-------------------------------|----------------------------|------------------------|
| $\text{NH}_3 + \text{SiH}_4 \longrightarrow \text{SiH}_3\text{NH}_2 + \text{H}_2$                                           | 0.0                    | -0.02                      | 1.76                          | -0.47                      | -0.46                  |
| $\text{NH}_3 + \text{SiH}_3\text{NH}_2 \longrightarrow \text{SiH}_2(\text{NH}_2)_2 + \text{H}_2$                            | 0.0                    | -0.11                      | 1.37                          | -0.72                      | -0.70                  |
| $\text{NH}_3 + \text{SiH}_2(\text{NH}_2)_2 \longrightarrow \text{SiH}(\text{NH}_2)_3 + \text{H}_2$                          | 0.0                    | -0.17                      | 1.67                          | -0.77                      | -0.76                  |
| $\text{NH}_3 + \text{SiH}(\text{NH}_2)_3 \longrightarrow \text{Si}(\text{NH}_2)_4 + \text{H}_2$                             | 0.0                    | -0.14                      | 1.65                          | -0.84                      | -0.81                  |
| $\text{SiH}_4 + \text{NH}_2\text{SiH}_3 \longrightarrow (\text{SiH}_3)_2\text{NH} + \text{H}_2$                             | 0.0                    | -0.11                      | 1.70                          | -0.63                      | -0.60                  |
| $\text{SiH}_4 + (\text{SiH}_3)_2\text{NH} \longrightarrow (\text{SiH}_3)_3\text{N} + \text{H}_2$                            | 0.0                    | -0.16                      | 1.67                          | -0.73                      | -0.70                  |
| $\text{SiH}_3\text{NH}_2 + (\text{NH}_2)_3\text{SiH} \longrightarrow \text{SiH}_3\text{-NH-Si}(\text{NH}_2)_3 + \text{H}_2$ | 0.0                    | -0.20                      | 1.66                          | -0.91                      | -0.88                  |
| $\text{SiH}_3\text{NH}_2 \longrightarrow \text{SiH}\text{NH}_2 + \text{H}_2$                                                | 0.0                    | -                          | 2.59                          | 1.61                       | 1.61                   |
| $\text{SiH}_2(\text{NH}_2)_2 \longrightarrow \text{Si}(\text{NH}_2)_2 + \text{H}_2$                                         | 0.0                    | -                          | 3.01                          | 1.23                       | 1.24                   |
| $\text{NH}_2 + \text{SiH}_3 \longrightarrow \text{SiH}_3\text{NH}_2$                                                        | 0.0                    | -                          | -                             | -                          | -4.58                  |
| $\text{NH}_2 + \text{SiH}_2\text{NH}_2 \longrightarrow \text{SiH}_2(\text{NH}_2)_2$                                         | 0.0                    | -                          | -                             | -                          | -4.89                  |
| $\text{NH}_2 + \text{SiH}(\text{NH}_2)_2 \longrightarrow \text{SiH}(\text{NH}_2)_3$                                         | 0.0                    | -                          | -                             | -                          | -5.05                  |
| $\text{NH}_2 + \text{Si}(\text{NH}_2)_3 \longrightarrow \text{Si}(\text{NH}_2)_4$                                           | 0.0                    | -                          | -                             | -                          | -5.15                  |
| $\text{SiH}_3 + \text{SiH}_3\text{NH} \longrightarrow (\text{SiH}_3)_2\text{NH}$                                            | 0.0                    | -                          | -                             | -                          | -4.97                  |
| $\text{SiH}_3 + (\text{SiH}_3)_2\text{N} \longrightarrow (\text{SiH}_3)_3\text{N}$                                          | 0.0                    | -                          | -                             | -                          | -5.68                  |
| $\text{SiH}_3 + \text{NH}_3 \longrightarrow \text{SiH}_3\text{NH}_3$                                                        | 0.0                    | -0.06                      | -0.00                         | -                          | 0.44                   |
| $\text{NH}_2\text{SiH}_2 + \text{NH}_3 \longrightarrow \text{NH}_2\text{SiH}_2\text{NH}_3$                                  | 0.0                    | -0.09                      | 0.43                          | -                          | 0.30                   |
| $(\text{NH}_2)_2\text{SiH} + \text{NH}_3 \longrightarrow (\text{NH}_2)_2\text{SiH}\text{NH}_3$                              | 0.0                    | -0.15                      | 0.41                          | -                          | 0.14                   |
| $\text{NH}_3\text{SiH}_3 \longrightarrow \text{NH}_2\text{SiH}_3 + \text{H}$                                                | 0.0                    | -                          | 0.27                          | -0.36                      | -0.31                  |
| $\text{NH}_2\text{SiH}_2\text{NH}_3 \longrightarrow (\text{NH}_2)_2\text{SiH}_2 + \text{H}$                                 | 0.0                    | -                          | 0.18                          | -0.51                      | -0.47                  |
| $(\text{NH}_2)_2\text{SiH}\text{NH}_3 \longrightarrow (\text{NH}_2)_3\text{SiH} + \text{H}$                                 | 0.0                    | -                          | 0.11                          | -0.56                      | -0.52                  |
| $(\text{NH}_2)_3\text{SiNH}_3 \longrightarrow (\text{NH}_2)_4\text{Si} + \text{H}$                                          | 0.0                    | -                          | 0.12                          | -0.44                      | -0.41                  |
| $\text{SiH}_2 + \text{NH}_3 \longrightarrow \text{SiH}_2\text{-NH}_3$                                                       | 0.0                    | -                          | -                             | -                          | -1.18                  |
| $\text{SiH}_2 + \text{NH}_2\text{SiH}_3 \longrightarrow \text{SiH}_2\text{-NH}_2\text{SiH}_3$                               | 0.0                    | -                          | -                             | -                          | -1.14                  |
| $\text{SiH}_2 + \text{NH}(\text{SiH}_3)_2 \longrightarrow \text{SiH}_2\text{-NH}(\text{SiH}_3)_2$                           | 0.0                    | -                          | -                             | -                          | -1.02                  |
| $\text{SiH}_2\text{-NH}_3 + \text{NH}_3 \longrightarrow \text{NH}_3\text{-SiH}_2\text{-NH}_3$                               | 0.0                    | -0.04                      | -                             | -                          | -0.16                  |
| $\text{SiH}_2\text{-NH}_3 \longrightarrow \text{SiH}_3\text{NH}_2$                                                          | 0.0                    | -                          | 1.44                          | -                          | -1.73                  |
| $\text{SiH}_2\text{-NH}_2\text{SiH}_3 \longrightarrow \text{NH}(\text{SiH}_3)_2$                                            | 0.0                    | -                          | 1.24                          | -                          | -1.94                  |
| $\text{SiH}_2\text{-NH}(\text{SiH}_3)_2 \longrightarrow \text{N}(\text{SiH}_3)_3$                                           | 0.0                    | -                          | 1.03                          | -                          | -2.07                  |
| $\text{NH}_2 + \text{SiH}_4 \longrightarrow \text{NH}_2\text{SiH}_3 + \text{H}$                                             | 0.0                    | -0.08                      | 0.20                          | -0.59                      | -0.57                  |
| $\text{NH}_2 + \text{NH}_2\text{SiH}_3 \longrightarrow (\text{NH}_2)_2\text{SiH}_2 + \text{H}$                              | 0.0                    | -0.15                      | -0.05                         | -0.83                      | -0.81                  |
| $\text{NH}_2 + (\text{NH}_2)_2\text{SiH}_2 \longrightarrow (\text{NH}_2)_3\text{SiH} + \text{H}$                            | 0.0                    | -0.26                      | -0.11                         | -0.92                      | -0.97                  |
| $\text{NH}_2 + (\text{NH}_2)_3\text{SiH} \longrightarrow (\text{NH}_2)_4\text{Si} + \text{H}$                               | 0.0                    | -0.12                      | 0.01                          | -0.99                      | -0.96                  |
| $\text{SiH}_3 + \text{SiH}_4 \longrightarrow \text{SiH}_4 + \text{SiH}_3$                                                   | 0.0                    | -0.11                      | 0.29                          | -0.11                      | 0.00                   |
| $\text{SiH}_3 + \text{NH}_2\text{SiH}_3 \longrightarrow \text{NH}_2\text{SiH}_2 + \text{SiH}_4$                             | 0.0                    | -0.07                      | 0.32                          | -0.09                      | -0.00                  |
| $\text{SiH}_3 + (\text{NH}_2)_2\text{SiH}_2 \longrightarrow (\text{NH}_2)_2\text{SiH} + \text{SiH}_4$                       | 0.0                    | -0.13                      | 0.32                          | -0.04                      | 0.06                   |
| $\text{SiH}_3 + (\text{NH}_2)_3\text{SiH} \longrightarrow (\text{NH}_2)_3\text{Si} + \text{SiH}_4$                          | 0.0                    | -0.09                      | 0.45                          | 0.12                       | 0.18                   |
| $\text{NH}_2 + \text{SiH}_4 \longrightarrow \text{SiH}_3 + \text{NH}_3$                                                     | 0.0                    | -0.08                      | 0.21                          | -0.63                      | -0.63                  |
| $\text{NH}_2 + \text{NH}_2\text{SiH}_3 \longrightarrow \text{NH}_2\text{SiH}_2 + \text{NH}_3$                               | 0.0                    | 0.01                       | 0.22                          | -0.80                      | -0.66                  |
| $\text{NH}_2 + (\text{NH}_2)_2\text{SiH}_2 \longrightarrow (\text{NH}_2)_2\text{SiH} + \text{NH}_3$                         | 0.0                    | -0.13                      | 0.20                          | -0.69                      | -0.54                  |
| $\text{NH}_2 + (\text{NH}_2)_3\text{SiH} \longrightarrow (\text{NH}_2)_3\text{Si} + \text{NH}_3$                            | 0.0                    | -0.12                      | 0.17                          | -0.56                      | -0.43                  |
| $\text{SiH}_4 + \text{H} \longrightarrow \text{SiH}_3 + \text{H}_2$                                                         | 0.0                    | -0.04                      | 0.19                          | -0.49                      | -0.45                  |
| $\text{NH}_2\text{SiH}_3 + \text{H} \longrightarrow \text{NH}_2\text{SiH}_2 + \text{H}_2$                                   | 0.0                    | -0.04                      | 0.10                          | -0.50                      | -0.44                  |
| $(\text{NH}_2)_2\text{SiH}_2 + \text{H} \longrightarrow (\text{NH}_2)_2\text{SiH} + \text{H}_2$                             | 0.0                    | -0.04                      | 0.20                          | -0.42                      | -0.37                  |
| $(\text{NH}_2)_3\text{SiH} + \text{H} \longrightarrow (\text{NH}_2)_3\text{Si} + \text{H}_2$                                | 0.0                    | -0.05                      | 0.18                          | -0.31                      | -0.25                  |

Table 3: Relative enthalpies of reactants ( $\Delta H_r$ ) pre-reaction complexes( $\Delta H_{pk1}$ ), transition states (reaction barrier,  $\Delta H^\ddagger$ ), post-reaction complexes ( $\Delta H_{pk2}$ ) and products ( $\Delta H_p$ ) for reactions in silane–ammonia plasma at 350 K. All enthalpies are calculated with MP2/aug-cc-pVTZ//CASPT2/aug-cc-pVTZ method and vibrational contribution to enthalpy is calculated with MP2/aug-cc-pVTZ. Enthalpies are shown relative to reactants.

| reaction                                                                                                                    | $\Delta H_r/\text{eV}$ | $\Delta H_{pk1}/\text{eV}$ | $\Delta H^\ddagger/\text{eV}$ | $\Delta H_{pk2}/\text{eV}$ | $\Delta H_p/\text{eV}$ |
|-----------------------------------------------------------------------------------------------------------------------------|------------------------|----------------------------|-------------------------------|----------------------------|------------------------|
| $\text{NH}_3 + \text{SiH}_4 \longrightarrow \text{SiH}_3\text{NH}_2 + \text{H}_2$                                           | 0.0                    | -0.01                      | 1.76                          | -0.44                      | -0.44                  |
| $\text{NH}_3 + \text{SiH}_3\text{NH}_2 \longrightarrow \text{SiH}_2(\text{NH}_2)_2 + \text{H}_2$                            | 0.0                    | -0.10                      | 1.36                          | -0.69                      | -0.68                  |
| $\text{NH}_3 + \text{SiH}_2(\text{NH}_2)_2 \longrightarrow \text{SiH}(\text{NH}_2)_3 + \text{H}_2$                          | 0.0                    | -0.16                      | 1.66                          | -0.74                      | -0.74                  |
| $\text{NH}_3 + \text{SiH}(\text{NH}_2)_3 \longrightarrow \text{Si}(\text{NH}_2)_4 + \text{H}_2$                             | 0.0                    | -0.13                      | 1.65                          | -0.82                      | -0.79                  |
| $\text{SiH}_4 + \text{NH}_2\text{SiH}_3 \longrightarrow (\text{SiH}_3)_2\text{NH} + \text{H}_2$                             | 0.0                    | -0.10                      | 1.70                          | -0.60                      | -0.59                  |
| $\text{SiH}_4 + (\text{SiH}_3)_2\text{NH} \longrightarrow (\text{SiH}_3)_3\text{N} + \text{H}_2$                            | 0.0                    | -0.14                      | 1.67                          | -0.70                      | -0.68                  |
| $\text{SiH}_3\text{NH}_2 + (\text{NH}_2)_3\text{SiH} \longrightarrow \text{SiH}_3\text{-NH-Si}(\text{NH}_2)_3 + \text{H}_2$ | 0.0                    | -0.19                      | 1.66                          | -0.87                      | -0.86                  |
| $\text{SiH}_3\text{NH}_2 \longrightarrow \text{SiH}\text{NH}_2 + \text{H}_2$                                                | 0.0                    | -                          | 2.59                          | 1.64                       | 1.63                   |
| $\text{SiH}_2(\text{NH}_2)_2 \longrightarrow \text{Si}(\text{NH}_2)_2 + \text{H}_2$                                         | 0.0                    | -                          | 3.00                          | 1.26                       | 1.25                   |
| $\text{NH}_2 + \text{SiH}_3 \longrightarrow \text{SiH}_3\text{NH}_2$                                                        | 0.0                    | -                          | -                             | -                          | -4.59                  |
| $\text{NH}_2 + \text{SiH}_2\text{NH}_2 \longrightarrow \text{SiH}_2(\text{NH}_2)_2$                                         | 0.0                    | -                          | -                             | -                          | -4.90                  |
| $\text{NH}_2 + \text{SiH}(\text{NH}_2)_2 \longrightarrow \text{SiH}(\text{NH}_2)_3$                                         | 0.0                    | -                          | -                             | -                          | -5.05                  |
| $\text{NH}_2 + \text{Si}(\text{NH}_2)_3 \longrightarrow \text{Si}(\text{NH}_2)_4$                                           | 0.0                    | -                          | -                             | -                          | -5.16                  |
| $\text{SiH}_3 + \text{SiH}_3\text{NH} \longrightarrow (\text{SiH}_3)_2\text{NH}$                                            | 0.0                    | -                          | -                             | -                          | -4.99                  |
| $\text{SiH}_3 + (\text{SiH}_3)_2\text{N} \longrightarrow (\text{SiH}_3)_3\text{N}$                                          | 0.0                    | -                          | -                             | -                          | -5.68                  |
| $\text{SiH}_3 + \text{NH}_3 \longrightarrow \text{SiH}_3\text{NH}_3$                                                        | 0.0                    | -0.05                      | -0.01                         | -                          | 0.43                   |
| $\text{NH}_2\text{SiH}_2 + \text{NH}_3 \longrightarrow \text{NH}_2\text{SiH}_2\text{NH}_3$                                  | 0.0                    | -0.07                      | 0.43                          | -                          | 0.29                   |
| $(\text{NH}_2)_2\text{SiH} + \text{NH}_3 \longrightarrow (\text{NH}_2)_2\text{SiH}\text{NH}_3$                              | 0.0                    | -0.14                      | 0.41                          | -                          | 0.13                   |
| $\text{NH}_3\text{SiH}_3 \longrightarrow \text{NH}_2\text{SiH}_3 + \text{H}$                                                | 0.0                    | -                          | 0.27                          | -0.36                      | -0.30                  |
| $\text{NH}_2\text{SiH}_2\text{NH}_3 \longrightarrow (\text{NH}_2)_2\text{SiH}_2 + \text{H}$                                 | 0.0                    | -                          | 0.17                          | -0.51                      | -0.45                  |
| $(\text{NH}_2)_2\text{SiH}\text{NH}_3 \longrightarrow (\text{NH}_2)_3\text{SiH} + \text{H}$                                 | 0.0                    | -                          | 0.11                          | -0.55                      | -0.50                  |
| $(\text{NH}_2)_3\text{SiNH}_3 \longrightarrow (\text{NH}_2)_4\text{Si} + \text{H}$                                          | 0.0                    | -                          | 0.12                          | -0.42                      | -0.39                  |
| $\text{SiH}_2 + \text{NH}_3 \longrightarrow \text{SiH}_2\text{-NH}_3$                                                       | 0.0                    | -                          | -                             | -                          | -1.19                  |
| $\text{SiH}_2 + \text{NH}_2\text{SiH}_3 \longrightarrow \text{SiH}_2\text{-NH}_2\text{SiH}_3$                               | 0.0                    | -                          | -                             | -                          | -1.14                  |
| $\text{SiH}_2 + \text{NH}(\text{SiH}_3)_2 \longrightarrow \text{SiH}_2\text{-NH}(\text{SiH}_3)_2$                           | 0.0                    | -                          | -                             | -                          | -1.01                  |
| $\text{SiH}_2\text{-NH}_3 + \text{NH}_3 \longrightarrow \text{NH}_3\text{-SiH}_2\text{-NH}_3$                               | 0.0                    | -0.03                      | -                             | -                          | -0.15                  |
| $\text{SiH}_2\text{-NH}_3 \longrightarrow \text{SiH}_3\text{NH}_2$                                                          | 0.0                    | -                          | 1.44                          | -                          | -1.72                  |
| $\text{SiH}_2\text{-NH}_2\text{SiH}_3 \longrightarrow \text{NH}(\text{SiH}_3)_2$                                            | 0.0                    | -                          | 1.24                          | -                          | -1.95                  |
| $\text{SiH}_2\text{-NH}(\text{SiH}_3)_2 \longrightarrow \text{N}(\text{SiH}_3)_3$                                           | 0.0                    | -                          | 1.03                          | -                          | -2.08                  |
| $\text{NH}_2 + \text{SiH}_4 \longrightarrow \text{NH}_2\text{SiH}_3 + \text{H}$                                             | 0.0                    | -0.08                      | 0.19                          | -0.59                      | -0.56                  |
| $\text{NH}_2 + \text{NH}_2\text{SiH}_3 \longrightarrow (\text{NH}_2)_2\text{SiH}_2 + \text{H}$                              | 0.0                    | -0.14                      | -0.06                         | -0.82                      | -0.80                  |
| $\text{NH}_2 + (\text{NH}_2)_2\text{SiH}_2 \longrightarrow (\text{NH}_2)_3\text{SiH} + \text{H}$                            | 0.0                    | -0.25                      | -0.11                         | -0.91                      | -0.96                  |
| $\text{NH}_2 + (\text{NH}_2)_3\text{SiH} \longrightarrow (\text{NH}_2)_4\text{Si} + \text{H}$                               | 0.0                    | -0.12                      | 0.01                          | -0.98                      | -0.95                  |
| $\text{SiH}_3 + \text{SiH}_4 \longrightarrow \text{SiH}_4 + \text{SiH}_3$                                                   | 0.0                    | -0.13                      | 0.30                          | -0.13                      | 0.00                   |
| $\text{SiH}_3 + \text{NH}_2\text{SiH}_3 \longrightarrow \text{NH}_2\text{SiH}_2 + \text{SiH}_4$                             | 0.0                    | -0.05                      | 0.34                          | -0.07                      | -0.00                  |
| $\text{SiH}_3 + (\text{NH}_2)_2\text{SiH}_2 \longrightarrow (\text{NH}_2)_2\text{SiH} + \text{SiH}_4$                       | 0.0                    | -0.12                      | 0.33                          | -0.02                      | 0.06                   |
| $\text{SiH}_3 + (\text{NH}_2)_3\text{SiH} \longrightarrow (\text{NH}_2)_3\text{Si} + \text{SiH}_4$                          | 0.0                    | -0.08                      | 0.45                          | 0.12                       | 0.18                   |
| $\text{NH}_2 + \text{SiH}_4 \longrightarrow \text{SiH}_3 + \text{NH}_3$                                                     | 0.0                    | -0.08                      | 0.21                          | -0.61                      | -0.63                  |
| $\text{NH}_2 + \text{NH}_2\text{SiH}_3 \longrightarrow \text{NH}_2\text{SiH}_2 + \text{NH}_3$                               | 0.0                    | 0.01                       | 0.22                          | -0.78                      | -0.66                  |
| $\text{NH}_2 + (\text{NH}_2)_2\text{SiH}_2 \longrightarrow (\text{NH}_2)_2\text{SiH} + \text{NH}_3$                         | 0.0                    | -0.11                      | 0.21                          | -0.68                      | -0.54                  |
| $\text{NH}_2 + (\text{NH}_2)_3\text{SiH} \longrightarrow (\text{NH}_2)_3\text{Si} + \text{NH}_3$                            | 0.0                    | -0.12                      | 0.18                          | -0.56                      | -0.43                  |
| $\text{SiH}_4 + \text{H} \longrightarrow \text{SiH}_3 + \text{H}_2$                                                         | 0.0                    | -0.05                      | 0.18                          | -0.49                      | -0.44                  |
| $\text{NH}_2\text{SiH}_3 + \text{H} \longrightarrow \text{NH}_2\text{SiH}_2 + \text{H}_2$                                   | 0.0                    | -0.05                      | 0.09                          | -0.51                      | -0.44                  |
| $(\text{NH}_2)_2\text{SiH}_2 + \text{H} \longrightarrow (\text{NH}_2)_2\text{SiH} + \text{H}_2$                             | 0.0                    | -0.05                      | 0.20                          | -0.42                      | -0.36                  |
| $(\text{NH}_2)_3\text{SiH} + \text{H} \longrightarrow (\text{NH}_2)_3\text{Si} + \text{H}_2$                                | 0.0                    | -0.06                      | 0.18                          | -0.31                      | -0.24                  |

Table 4: Relative Gibbs free energies of reactants ( $\Delta G_r$ ) pre-reaction complexes( $\Delta G_{pk1}$ ), transition states ( $\Delta G^\ddagger$ ), post-reaction complexes ( $\Delta G_{pk2}$ ) and products ( $\Delta G_p$ ) for reactions in silane-ammonia plasma at 200 K and 50 Pa. All Gibbs free energies are calculated with MP2/aug-cc-pVTZ//CASPT2/aug-cc-pVTZ method and vibrational contribution to entropy is calculated with MP2/aug-cc-pVTZ. Entropy of hydrogen molecule is taken from NIST-JANAF thermochemical tables.<sup>1</sup> Relative Gibbs free energies are shown relative to reactants.

| reaction                                                                                                                    | $\Delta G_r/\text{eV}$ | $\Delta G_{pk1}/\text{eV}$ | $\Delta G^\ddagger/\text{eV}$ | $\Delta G_{pk2}/\text{eV}$ | $\Delta G_p/\text{eV}$ |
|-----------------------------------------------------------------------------------------------------------------------------|------------------------|----------------------------|-------------------------------|----------------------------|------------------------|
| $\text{NH}_3 + \text{SiH}_4 \longrightarrow \text{SiH}_3\text{NH}_2 + \text{H}_2$                                           | 0.0                    | 0.21                       | 2.15                          | -0.20                      | -0.32                  |
| $\text{NH}_3 + \text{SiH}_3\text{NH}_2 \longrightarrow \text{SiH}_2(\text{NH}_2)_2 + \text{H}_2$                            | 0.0                    | 0.21                       | 1.83                          | -0.38                      | -0.49                  |
| $\text{NH}_3 + \text{SiH}_2(\text{NH}_2)_2 \longrightarrow \text{SiH}(\text{NH}_2)_3 + \text{H}_2$                          | 0.0                    | 0.14                       | 2.12                          | -0.46                      | -0.56                  |
| $\text{NH}_3 + \text{SiH}(\text{NH}_2)_3 \longrightarrow \text{Si}(\text{NH}_2)_4 + \text{H}_2$                             | 0.0                    | 0.21                       | 2.12                          | -0.46                      | -0.58                  |
| $\text{SiH}_4 + \text{NH}_2\text{SiH}_3 \longrightarrow (\text{SiH}_3)_2\text{NH} + \text{H}_2$                             | 0.0                    | 0.20                       | 2.12                          | -0.35                      | -0.47                  |
| $\text{SiH}_4 + (\text{SiH}_3)_2\text{NH} \longrightarrow (\text{SiH}_3)_3\text{N} + \text{H}_2$                            | 0.0                    | 0.23                       | 2.15                          | -0.37                      | -0.45                  |
| $\text{SiH}_3\text{NH}_2 + (\text{NH}_2)_3\text{SiH} \longrightarrow \text{SiH}_3\text{-NH-Si}(\text{NH}_2)_3 + \text{H}_2$ | 0.0                    | 0.18                       | 2.18                          | -0.52                      | -0.62                  |
| $\text{SiH}_3\text{NH}_2 \longrightarrow \text{SiHNH}_2 + \text{H}_2$                                                       | 0.0                    | -                          | 2.59                          | 1.51                       | 1.38                   |
| $\text{SiH}_2(\text{NH}_2)_2 \longrightarrow \text{Si}(\text{NH}_2)_2 + \text{H}_2$                                         | 0.0                    | -                          | 3.02                          | 1.12                       | 1.01                   |
| $\text{NH}_2^\cdot + \text{SiH}_3^\cdot \longrightarrow \text{SiH}_3\text{NH}_2$                                            | 0.0                    | -                          | -                             | -                          | -4.14                  |
| $\text{NH}_2^\cdot + \text{SiH}_2\text{NH}_2^\cdot \longrightarrow \text{SiH}_2(\text{NH}_2)_2$                             | 0.0                    | -                          | -                             | -                          | -4.41                  |
| $\text{NH}_2^\cdot + \text{SiH}(\text{NH}_2)_2^\cdot \longrightarrow \text{SiH}(\text{NH}_2)_3$                             | 0.0                    | -                          | -                             | -                          | -4.56                  |
| $\text{NH}_2^\cdot + \text{Si}(\text{NH}_2)_3^\cdot \longrightarrow \text{Si}(\text{NH}_2)_4$                               | 0.0                    | -                          | -                             | -                          | -4.64                  |
| $\text{SiH}_3^\cdot + \text{SiH}_3\text{NH}^\cdot \longrightarrow (\text{SiH}_3)_2\text{NH}$                                | 0.0                    | -                          | -                             | -                          | -4.48                  |
| $\text{SiH}_3^\cdot + (\text{SiH}_3)_2\text{N}^\cdot \longrightarrow (\text{SiH}_3)_3\text{N}$                              | 0.0                    | -                          | -                             | -                          | -5.16                  |
| $\text{SiH}_3^\cdot + \text{NH}_3 \longrightarrow \text{SiH}_3\text{NH}_3^\cdot$                                            | 0.0                    | 0.22                       | 0.39                          | -                          | 0.87                   |
| $\text{NH}_2\text{SiH}_2^\cdot + \text{NH}_3 \longrightarrow \text{NH}_2\text{SiH}_2\text{NH}_3^\cdot$                      | 0.0                    | 0.23                       | 0.86                          | -                          | 0.74                   |
| $(\text{NH}_2)_2\text{SiH}^\cdot + \text{NH}_3 \longrightarrow (\text{NH}_2)_2\text{SiHNH}_3^\cdot$                         | 0.0                    | 0.14                       | 0.87                          | -                          | 0.58                   |
| $\text{NH}_3\text{SiH}_3^\cdot \longrightarrow \text{NH}_2\text{SiH}_3 + \text{H}^\cdot$                                    | 0.0                    | -                          | 0.27                          | -0.38                      | -0.65                  |
| $\text{NH}_2\text{SiH}_2\text{NH}_3^\cdot \longrightarrow (\text{NH}_2)_2\text{SiH}_2 + \text{H}^\cdot$                     | 0.0                    | -                          | 0.20                          | -0.55                      | -0.80                  |
| $(\text{NH}_2)_2\text{SiHNH}_3^\cdot \longrightarrow (\text{NH}_2)_3\text{SiH} + \text{H}^\cdot$                            | 0.0                    | -                          | 0.12                          | -0.57                      | -0.85                  |
| $(\text{NH}_2)_3\text{SiNH}_3^\cdot \longrightarrow (\text{NH}_2)_4\text{Si} + \text{H}^\cdot$                              | 0.0                    | -                          | 0.13                          | -0.50                      | -0.72                  |
| $\text{SiH}_2 + \text{NH}_3 \longrightarrow \text{SiH}_2\text{-NH}_3$                                                       | 0.0                    | -                          | -                             | -                          | -0.78                  |
| $\text{SiH}_2 + \text{NH}_2\text{SiH}_3 \longrightarrow \text{SiH}_2\text{-NH}_2\text{SiH}_3$                               | 0.0                    | -                          | -                             | -                          | -0.69                  |
| $\text{SiH}_2 + \text{NH}(\text{SiH}_3)_2 \longrightarrow \text{SiH}_2\text{-NH}(\text{SiH}_3)_2$                           | 0.0                    | -                          | -                             | -                          | -0.58                  |
| $\text{SiH}_2\text{-NH}_3 + \text{NH}_3 \longrightarrow \text{NH}_3\text{-SiH}_2\text{-NH}_3$                               | 0.0                    | 0.26                       | -                             | -                          | 0.22                   |
| $\text{SiH}_2\text{-NH}_3 \longrightarrow \text{SiH}_3\text{NH}_2$                                                          | 0.0                    | -                          | 1.44                          | -                          | -1.74                  |
| $\text{SiH}_2\text{-NH}_2\text{SiH}_3 \longrightarrow \text{NH}(\text{SiH}_3)_2$                                            | 0.0                    | -                          | 1.23                          | -                          | -1.94                  |
| $\text{SiH}_2\text{-NH}(\text{SiH}_3)_2 \longrightarrow \text{N}(\text{SiH}_3)_3$                                           | 0.0                    | -                          | 1.04                          | -                          | -2.05                  |
| $\text{NH}_2^\cdot + \text{SiH}_4 \longrightarrow \text{NH}_2\text{SiH}_3 + \text{H}^\cdot$                                 | 0.0                    | 0.21                       | 0.61                          | -0.27                      | -0.51                  |
| $\text{NH}_2^\cdot + \text{NH}_2\text{SiH}_3 \longrightarrow (\text{NH}_2)_2\text{SiH}_2 + \text{H}^\cdot$                  | 0.0                    | 0.15                       | 0.41                          | -0.45                      | -0.69                  |
| $\text{NH}_2^\cdot + (\text{NH}_2)_2\text{SiH}_2 \longrightarrow (\text{NH}_2)_3\text{SiH} + \text{H}^\cdot$                | 0.0                    | 0.12                       | 0.34                          | -0.55                      | -0.87                  |
| $\text{NH}_2^\cdot + (\text{NH}_2)_3\text{SiH} \longrightarrow (\text{NH}_2)_4\text{Si} + \text{H}^\cdot$                   | 0.0                    | 0.25                       | 0.47                          | -0.59                      | -0.83                  |
| $\text{SiH}_3^\cdot + \text{SiH}_4 \longrightarrow \text{SiH}_4 + \text{SiH}_3^\cdot$                                       | 0.0                    | 0.29                       | 0.61                          | 0.29                       | 0.01                   |
| $\text{SiH}_3^\cdot + \text{NH}_2\text{SiH}_3 \longrightarrow \text{NH}_2\text{SiH}_2^\cdot + \text{SiH}_4$                 | 0.0                    | 0.22                       | 0.64                          | 0.20                       | 0.02                   |
| $\text{SiH}_3^\cdot + (\text{NH}_2)_2\text{SiH}_2 \longrightarrow (\text{NH}_2)_2\text{SiH}^\cdot + \text{SiH}_4$           | 0.0                    | 0.20                       | 0.66                          | 0.29                       | 0.07                   |
| $\text{SiH}_3^\cdot + (\text{NH}_2)_3\text{SiH} \longrightarrow (\text{NH}_2)_3\text{Si}^\cdot + \text{SiH}_4$              | 0.0                    | 0.24                       | 0.84                          | 0.46                       | 0.19                   |
| $\text{NH}_2^\cdot + \text{SiH}_4 \longrightarrow \text{SiH}_3^\cdot + \text{NH}_3$                                         | 0.0                    | 0.20                       | 0.54                          | -0.43                      | -0.65                  |
| $\text{NH}_2^\cdot + \text{NH}_2\text{SiH}_3 \longrightarrow \text{NH}_2\text{SiH}_2^\cdot + \text{NH}_3$                   | 0.0                    | 0.31                       | 0.59                          | -0.51                      | -0.65                  |
| $\text{NH}_2^\cdot + (\text{NH}_2)_2\text{SiH}_2 \longrightarrow (\text{NH}_2)_2\text{SiH}^\cdot + \text{NH}_3$             | 0.0                    | 0.18                       | 0.57                          | -0.40                      | -0.55                  |
| $\text{NH}_2^\cdot + (\text{NH}_2)_3\text{SiH} \longrightarrow (\text{NH}_2)_3\text{Si}^\cdot + \text{NH}_3$                | 0.0                    | 0.25                       | 0.54                          | -0.22                      | -0.44                  |
| $\text{SiH}_4 + \text{H}^\cdot \longrightarrow \text{SiH}_3^\cdot + \text{H}_2$                                             | 0.0                    | 0.23                       | 0.48                          | -0.27                      | -0.37                  |
| $\text{NH}_2\text{SiH}_3 + \text{H}^\cdot \longrightarrow \text{NH}_2\text{SiH}_2^\cdot + \text{H}_2$                       | 0.0                    | 0.27                       | 0.41                          | -0.23                      | -0.34                  |
| $(\text{NH}_2)_2\text{SiH}_2 + \text{H}^\cdot \longrightarrow (\text{NH}_2)_2\text{SiH}^\cdot + \text{H}_2$                 | 0.0                    | 0.26                       | 0.50                          | -0.15                      | -0.29                  |
| $(\text{NH}_2)_3\text{SiH} + \text{H}^\cdot \longrightarrow (\text{NH}_2)_3\text{Si}^\cdot + \text{H}_2$                    | 0.0                    | 0.27                       | 0.48                          | -0.04                      | -0.17                  |

Table 5: Relative Gibbs free energies of reactants ( $\Delta G_r$ ) pre-reaction complexes( $\Delta G_{pk1}$ ), transition states ( $\Delta G^\ddagger$ ), post-reaction complexes ( $\Delta G_{pk2}$ ) and products ( $\Delta G_p$ ) for reactions in silane-ammonia plasma at 200 K and 100 Pa. All Gibbs free energies are calculated with MP2/aug-cc-pVTZ//CASPT2/aug-cc-pVTZ method and vibrational contribution to entropy is calculated with MP2/aug-cc-pVTZ. Entropy of hydrogen molecule is taken from NIST-JANAF thermochemical tables.<sup>1</sup> Relative Gibbs free energies are shown relative to reactants.

| reaction                                                                                                                | $\Delta G_r/\text{eV}$ | $\Delta G_{pk1}/\text{eV}$ | $\Delta G^\ddagger/\text{eV}$ | $\Delta G_{pk2}/\text{eV}$ | $\Delta G_p/\text{eV}$ |
|-------------------------------------------------------------------------------------------------------------------------|------------------------|----------------------------|-------------------------------|----------------------------|------------------------|
| $\text{NH}_3 + \text{SiH}_4 \rightarrow \text{SiH}_3\text{NH}_2 + \text{H}_2$                                           | 0.0                    | 0.20                       | 2.14                          | -0.21                      | -0.33                  |
| $\text{NH}_3 + \text{SiH}_3\text{NH}_2 \rightarrow \text{SiH}_2(\text{NH}_2)_2 + \text{H}_2$                            | 0.0                    | 0.20                       | 1.81                          | -0.39                      | -0.50                  |
| $\text{NH}_3 + \text{SiH}_2(\text{NH}_2)_2 \rightarrow \text{SiH}(\text{NH}_2)_3 + \text{H}_2$                          | 0.0                    | 0.13                       | 2.11                          | -0.48                      | -0.57                  |
| $\text{NH}_3 + \text{SiH}(\text{NH}_2)_3 \rightarrow \text{Si}(\text{NH}_2)_4 + \text{H}_2$                             | 0.0                    | 0.20                       | 2.11                          | -0.47                      | -0.60                  |
| $\text{SiH}_4 + \text{NH}_2\text{SiH}_3 \rightarrow (\text{SiH}_3)_2\text{NH} + \text{H}_2$                             | 0.0                    | 0.19                       | 2.11                          | -0.36                      | -0.48                  |
| $\text{SiH}_4 + (\text{SiH}_3)_2\text{NH} \rightarrow (\text{SiH}_3)_3\text{N} + \text{H}_2$                            | 0.0                    | 0.21                       | 2.13                          | -0.39                      | -0.47                  |
| $\text{SiH}_3\text{NH}_2 + (\text{NH}_2)_3\text{SiH} \rightarrow \text{SiH}_3\text{-NH-Si}(\text{NH}_2)_3 + \text{H}_2$ | 0.0                    | 0.17                       | 2.17                          | -0.53                      | -0.64                  |
| $\text{SiH}_3\text{NH}_2 \rightarrow \text{SiHNH}_2 + \text{H}_2$                                                       | 0.0                    | -                          | 2.59                          | 1.51                       | 1.38                   |
| $\text{SiH}_2(\text{NH}_2)_2 \rightarrow \text{Si}(\text{NH}_2)_2 + \text{H}_2$                                         | 0.0                    | -                          | 3.02                          | 1.12                       | 1.01                   |
| $\text{NH}_2 + \text{SiH}_3 \rightarrow \text{SiH}_3\text{NH}_2$                                                        | 0.0                    | -                          | -                             | -                          | -4.15                  |
| $\text{NH}_2 + \text{SiH}_2\text{NH}_2 \rightarrow \text{SiH}_2(\text{NH}_2)_2$                                         | 0.0                    | -                          | -                             | -                          | -4.42                  |
| $\text{NH}_2 + \text{SiH}(\text{NH}_2)_2 \rightarrow \text{SiH}(\text{NH}_2)_3$                                         | 0.0                    | -                          | -                             | -                          | -4.58                  |
| $\text{NH}_2 + \text{Si}(\text{NH}_2)_3 \rightarrow \text{Si}(\text{NH}_2)_4$                                           | 0.0                    | -                          | -                             | -                          | -4.66                  |
| $\text{SiH}_3 + \text{SiH}_3\text{NH} \rightarrow (\text{SiH}_3)_2\text{NH}$                                            | 0.0                    | -                          | -                             | -                          | -4.49                  |
| $\text{SiH}_3 + (\text{SiH}_3)_2\text{N} \rightarrow (\text{SiH}_3)_3\text{N}$                                          | 0.0                    | -                          | -                             | -                          | -5.17                  |
| $\text{SiH}_3 + \text{NH}_3 \rightarrow \text{SiH}_3\text{NH}_3$                                                        | 0.0                    | 0.21                       | 0.38                          | -                          | 0.85                   |
| $\text{NH}_2\text{SiH}_2 + \text{NH}_3 \rightarrow \text{NH}_2\text{SiH}_2\text{NH}_3$                                  | 0.0                    | 0.22                       | 0.85                          | -                          | 0.72                   |
| $(\text{NH}_2)_2\text{SiH} + \text{NH}_3 \rightarrow (\text{NH}_2)_2\text{SiHNH}_3$                                     | 0.0                    | 0.13                       | 0.86                          | -                          | 0.57                   |
| $\text{NH}_3\text{SiH}_3 \rightarrow \text{NH}_2\text{SiH}_3 + \text{H}$                                                | 0.0                    | -                          | 0.27                          | -0.38                      | -0.64                  |
| $\text{NH}_2\text{SiH}_2\text{NH}_3 \rightarrow (\text{NH}_2)_2\text{SiH}_2 + \text{H}$                                 | 0.0                    | -                          | 0.20                          | -0.55                      | -0.78                  |
| $(\text{NH}_2)_2\text{SiHNH}_3 \rightarrow (\text{NH}_2)_3\text{SiH} + \text{H}$                                        | 0.0                    | -                          | 0.12                          | -0.57                      | -0.84                  |
| $(\text{NH}_2)_3\text{SiNH}_3 \rightarrow (\text{NH}_2)_4\text{Si} + \text{H}$                                          | 0.0                    | -                          | 0.13                          | -0.50                      | -0.71                  |
| $\text{SiH}_2 + \text{NH}_3 \rightarrow \text{SiH}_2\text{-NH}_3$                                                       | 0.0                    | -                          | -                             | -                          | -0.79                  |
| $\text{SiH}_2 + \text{NH}_2\text{SiH}_3 \rightarrow \text{SiH}_2\text{-NH}_2\text{SiH}_3$                               | 0.0                    | -                          | -                             | -                          | -0.70                  |
| $\text{SiH}_2 + \text{NH}(\text{SiH}_3)_2 \rightarrow \text{SiH}_2\text{-NH}(\text{SiH}_3)_2$                           | 0.0                    | -                          | -                             | -                          | -0.59                  |
| $\text{SiH}_2\text{-NH}_3 + \text{NH}_3 \rightarrow \text{NH}_3\text{-SiH}_2\text{-NH}_3$                               | 0.0                    | 0.25                       | -                             | -                          | 0.21                   |
| $\text{SiH}_2\text{-NH}_3 \rightarrow \text{SiH}_3\text{NH}_2$                                                          | 0.0                    | -                          | 1.44                          | -                          | -1.74                  |
| $\text{SiH}_2\text{-NH}_2\text{SiH}_3 \rightarrow \text{NH}(\text{SiH}_3)_2$                                            | 0.0                    | -                          | 1.23                          | -                          | -1.94                  |
| $\text{SiH}_2\text{-NH}(\text{SiH}_3)_2 \rightarrow \text{N}(\text{SiH}_3)_3$                                           | 0.0                    | -                          | 1.04                          | -                          | -2.05                  |
| $\text{NH}_2 + \text{SiH}_4 \rightarrow \text{NH}_2\text{SiH}_3 + \text{H}$                                             | 0.0                    | 0.20                       | 0.60                          | -0.28                      | -0.51                  |
| $\text{NH}_2 + \text{NH}_2\text{SiH}_3 \rightarrow (\text{NH}_2)_2\text{SiH}_2 + \text{H}$                              | 0.0                    | 0.14                       | 0.40                          | -0.46                      | -0.69                  |
| $\text{NH}_2 + (\text{NH}_2)_2\text{SiH}_2 \rightarrow (\text{NH}_2)_3\text{SiH} + \text{H}$                            | 0.0                    | 0.11                       | 0.33                          | -0.57                      | -0.87                  |
| $\text{NH}_2 + (\text{NH}_2)_3\text{SiH} \rightarrow (\text{NH}_2)_4\text{Si} + \text{H}$                               | 0.0                    | 0.23                       | 0.46                          | -0.60                      | -0.83                  |
| $\text{SiH}_3 + \text{SiH}_4 \rightarrow \text{SiH}_4 + \text{SiH}_3$                                                   | 0.0                    | 0.28                       | 0.60                          | 0.28                       | 0.01                   |
| $\text{SiH}_3 + \text{NH}_2\text{SiH}_3 \rightarrow \text{NH}_2\text{SiH}_2 + \text{SiH}_4$                             | 0.0                    | 0.21                       | 0.63                          | 0.19                       | 0.02                   |
| $\text{SiH}_3 + (\text{NH}_2)_2\text{SiH}_2 \rightarrow (\text{NH}_2)_2\text{SiH} + \text{SiH}_4$                       | 0.0                    | 0.19                       | 0.65                          | 0.28                       | 0.07                   |
| $\text{SiH}_3 + (\text{NH}_2)_3\text{SiH} \rightarrow (\text{NH}_2)_3\text{Si} + \text{SiH}_4$                          | 0.0                    | 0.23                       | 0.82                          | 0.45                       | 0.19                   |
| $\text{NH}_2 + \text{SiH}_4 \rightarrow \text{SiH}_3 + \text{NH}_3$                                                     | 0.0                    | 0.19                       | 0.53                          | -0.44                      | -0.65                  |
| $\text{NH}_2 + \text{NH}_2\text{SiH}_3 \rightarrow \text{NH}_2\text{SiH}_2 + \text{NH}_3$                               | 0.0                    | 0.30                       | 0.58                          | -0.52                      | -0.65                  |
| $\text{NH}_2 + (\text{NH}_2)_2\text{SiH}_2 \rightarrow (\text{NH}_2)_2\text{SiH} + \text{NH}_3$                         | 0.0                    | 0.17                       | 0.56                          | -0.41                      | -0.55                  |
| $\text{NH}_2 + (\text{NH}_2)_3\text{SiH} \rightarrow (\text{NH}_2)_3\text{Si} + \text{NH}_3$                            | 0.0                    | 0.23                       | 0.52                          | -0.23                      | -0.44                  |
| $\text{SiH}_4 + \text{H} \rightarrow \text{SiH}_3 + \text{H}_2$                                                         | 0.0                    | 0.22                       | 0.46                          | -0.28                      | -0.38                  |
| $\text{NH}_2\text{SiH}_3 + \text{H} \rightarrow \text{NH}_2\text{SiH}_2 + \text{H}_2$                                   | 0.0                    | 0.26                       | 0.40                          | -0.25                      | -0.36                  |
| $(\text{NH}_2)_2\text{SiH}_2 + \text{H} \rightarrow (\text{NH}_2)_2\text{SiH} + \text{H}_2$                             | 0.0                    | 0.25                       | 0.49                          | -0.17                      | -0.30                  |
| $(\text{NH}_2)_3\text{SiH} + \text{H} \rightarrow (\text{NH}_2)_3\text{Si} + \text{H}_2$                                | 0.0                    | 0.26                       | 0.47                          | -0.05                      | -0.18                  |

Table 6: Relative Gibbs free energies of reactants ( $\Delta G_r$ ) pre-reaction complexes( $\Delta G_{pk1}$ ), transition states ( $\Delta G^\ddagger$ ), post-reaction complexes ( $\Delta G_{pk2}$ ) and products ( $\Delta G_p$ ) for reactions in silane-ammonia plasma at 200 K and 200 Pa. All Gibbs free energies are calculated with MP2/aug-cc-pVTZ//CASPT2/aug-cc-pVTZ method and vibrational contribution to entropy is calculated with MP2/aug-cc-pVTZ. Entropy of hydrogen molecule is taken from NIST-JANAF thermochemical tables.<sup>1</sup> Relative Gibbs free energies are shown relative to reactants.

| reaction                                                                                                                    | $\Delta G_r/\text{eV}$ | $\Delta G_{pk1}/\text{eV}$ | $\Delta G^\ddagger/\text{eV}$ | $\Delta G_{pk2}/\text{eV}$ | $\Delta G_p/\text{eV}$ |
|-----------------------------------------------------------------------------------------------------------------------------|------------------------|----------------------------|-------------------------------|----------------------------|------------------------|
| $\text{NH}_3 + \text{SiH}_4 \longrightarrow \text{SiH}_3\text{NH}_2 + \text{H}_2$                                           | 0.0                    | 0.18                       | 2.13                          | -0.23                      | -0.34                  |
| $\text{NH}_3 + \text{SiH}_3\text{NH}_2 \longrightarrow \text{SiH}_2(\text{NH}_2)_2 + \text{H}_2$                            | 0.0                    | 0.18                       | 1.80                          | -0.41                      | -0.52                  |
| $\text{NH}_3 + \text{SiH}_2(\text{NH}_2)_2 \longrightarrow \text{SiH}(\text{NH}_2)_3 + \text{H}_2$                          | 0.0                    | 0.12                       | 2.10                          | -0.49                      | -0.58                  |
| $\text{NH}_3 + \text{SiH}(\text{NH}_2)_3 \longrightarrow \text{Si}(\text{NH}_2)_4 + \text{H}_2$                             | 0.0                    | 0.19                       | 2.09                          | -0.48                      | -0.61                  |
| $\text{SiH}_4 + \text{NH}_2\text{SiH}_3 \longrightarrow (\text{SiH}_3)_2\text{NH} + \text{H}_2$                             | 0.0                    | 0.18                       | 2.10                          | -0.37                      | -0.49                  |
| $\text{SiH}_4 + (\text{SiH}_3)_2\text{NH} \longrightarrow (\text{SiH}_3)_3\text{N} + \text{H}_2$                            | 0.0                    | 0.20                       | 2.12                          | -0.40                      | -0.48                  |
| $\text{SiH}_3\text{NH}_2 + (\text{NH}_2)_3\text{SiH} \longrightarrow \text{SiH}_3\text{-NH-Si}(\text{NH}_2)_3 + \text{H}_2$ | 0.0                    | 0.16                       | 2.16                          | -0.54                      | -0.65                  |
| $\text{SiH}_3\text{NH}_2 \longrightarrow \text{SiHNH}_2 + \text{H}_2$                                                       | 0.0                    | -                          | 2.59                          | 1.51                       | 1.38                   |
| $\text{SiH}_2(\text{NH}_2)_2 \longrightarrow \text{Si}(\text{NH}_2)_2 + \text{H}_2$                                         | 0.0                    | -                          | 3.02                          | 1.12                       | 1.01                   |
| $\text{NH}_2^\cdot + \text{SiH}_3^\cdot \longrightarrow \text{SiH}_3\text{NH}_2$                                            | 0.0                    | -                          | -                             | -                          | -4.17                  |
| $\text{NH}_2^\cdot + \text{SiH}_2\text{NH}_2^\cdot \longrightarrow \text{SiH}_2(\text{NH}_2)_2$                             | 0.0                    | -                          | -                             | -                          | -4.43                  |
| $\text{NH}_2^\cdot + \text{SiH}(\text{NH}_2)_2^\cdot \longrightarrow \text{SiH}(\text{NH}_2)_3$                             | 0.0                    | -                          | -                             | -                          | -4.59                  |
| $\text{NH}_2^\cdot + \text{Si}(\text{NH}_2)_3^\cdot \longrightarrow \text{Si}(\text{NH}_2)_4$                               | 0.0                    | -                          | -                             | -                          | -4.67                  |
| $\text{SiH}_3^\cdot + \text{SiH}_3\text{NH}^\cdot \longrightarrow (\text{SiH}_3)_2\text{NH}$                                | 0.0                    | -                          | -                             | -                          | -4.50                  |
| $\text{SiH}_3^\cdot + (\text{SiH}_3)_2\text{N}^\cdot \longrightarrow (\text{SiH}_3)_3\text{N}$                              | 0.0                    | -                          | -                             | -                          | -5.18                  |
| $\text{SiH}_3^\cdot + \text{NH}_3 \longrightarrow \text{SiH}_3\text{NH}_3^\cdot$                                            | 0.0                    | 0.20                       | 0.37                          | -                          | 0.84                   |
| $\text{NH}_2\text{SiH}_2^\cdot + \text{NH}_3 \longrightarrow \text{NH}_2\text{SiH}_2\text{NH}_3^\cdot$                      | 0.0                    | 0.21                       | 0.84                          | -                          | 0.71                   |
| $(\text{NH}_2)_2\text{SiH}^\cdot + \text{NH}_3 \longrightarrow (\text{NH}_2)_2\text{SiHNH}_3^\cdot$                         | 0.0                    | 0.12                       | 0.85                          | -                          | 0.56                   |
| $\text{NH}_3\text{SiH}_3^\cdot \longrightarrow \text{NH}_2\text{SiH}_3 + \text{H}^\cdot$                                    | 0.0                    | -                          | 0.27                          | -0.38                      | -0.62                  |
| $\text{NH}_2\text{SiH}_2\text{NH}_3^\cdot \longrightarrow (\text{NH}_2)_2\text{SiH}_2 + \text{H}^\cdot$                     | 0.0                    | -                          | 0.20                          | -0.55                      | -0.77                  |
| $(\text{NH}_2)_2\text{SiHNH}_3^\cdot \longrightarrow (\text{NH}_2)_3\text{SiH} + \text{H}^\cdot$                            | 0.0                    | -                          | 0.12                          | -0.57                      | -0.82                  |
| $(\text{NH}_2)_3\text{SiNH}_3^\cdot \longrightarrow (\text{NH}_2)_4\text{Si} + \text{H}^\cdot$                              | 0.0                    | -                          | 0.13                          | -0.50                      | -0.70                  |
| $\text{SiH}_2 + \text{NH}_3 \longrightarrow \text{SiH}_2\text{-NH}_3$                                                       | 0.0                    | -                          | -                             | -                          | -0.80                  |
| $\text{SiH}_2 + \text{NH}_2\text{SiH}_3 \longrightarrow \text{SiH}_2\text{-NH}_2\text{SiH}_3$                               | 0.0                    | -                          | -                             | -                          | -0.71                  |
| $\text{SiH}_2 + \text{NH}(\text{SiH}_3)_2 \longrightarrow \text{SiH}_2\text{-NH}(\text{SiH}_3)_2$                           | 0.0                    | -                          | -                             | -                          | -0.60                  |
| $\text{SiH}_2\text{-NH}_3 + \text{NH}_3 \longrightarrow \text{NH}_3\text{-SiH}_2\text{-NH}_3$                               | 0.0                    | 0.24                       | -                             | -                          | 0.19                   |
| $\text{SiH}_2\text{-NH}_3 \longrightarrow \text{SiH}_3\text{NH}_2$                                                          | 0.0                    | -                          | 1.44                          | -                          | -1.74                  |
| $\text{SiH}_2\text{-NH}_2\text{SiH}_3 \longrightarrow \text{NH}(\text{SiH}_3)_2$                                            | 0.0                    | -                          | 1.23                          | -                          | -1.94                  |
| $\text{SiH}_2\text{-NH}(\text{SiH}_3)_2 \longrightarrow \text{N}(\text{SiH}_3)_3$                                           | 0.0                    | -                          | 1.04                          | -                          | -2.05                  |
| $\text{NH}_2^\cdot + \text{SiH}_4 \longrightarrow \text{NH}_2\text{SiH}_3 + \text{H}^\cdot$                                 | 0.0                    | 0.19                       | 0.59                          | -0.29                      | -0.51                  |
| $\text{NH}_2^\cdot + \text{NH}_2\text{SiH}_3 \longrightarrow (\text{NH}_2)_2\text{SiH}_2 + \text{H}^\cdot$                  | 0.0                    | 0.13                       | 0.39                          | -0.47                      | -0.69                  |
| $\text{NH}_2^\cdot + (\text{NH}_2)_2\text{SiH}_2 \longrightarrow (\text{NH}_2)_3\text{SiH} + \text{H}^\cdot$                | 0.0                    | 0.09                       | 0.31                          | -0.58                      | -0.87                  |
| $\text{NH}_2^\cdot + (\text{NH}_2)_3\text{SiH} \longrightarrow (\text{NH}_2)_4\text{Si} + \text{H}^\cdot$                   | 0.0                    | 0.22                       | 0.45                          | -0.61                      | -0.83                  |
| $\text{SiH}_3^\cdot + \text{SiH}_4 \longrightarrow \text{SiH}_4 + \text{SiH}_3^\cdot$                                       | 0.0                    | 0.26                       | 0.59                          | 0.26                       | 0.01                   |
| $\text{SiH}_3^\cdot + \text{NH}_2\text{SiH}_3 \longrightarrow \text{NH}_2\text{SiH}_2^\cdot + \text{SiH}_4$                 | 0.0                    | 0.20                       | 0.61                          | 0.18                       | 0.02                   |
| $\text{SiH}_3^\cdot + (\text{NH}_2)_2\text{SiH}_2 \longrightarrow (\text{NH}_2)_2\text{SiH}^\cdot + \text{SiH}_4$           | 0.0                    | 0.18                       | 0.64                          | 0.26                       | 0.07                   |
| $\text{SiH}_3^\cdot + (\text{NH}_2)_3\text{SiH} \longrightarrow (\text{NH}_2)_3\text{Si}^\cdot + \text{SiH}_4$              | 0.0                    | 0.22                       | 0.81                          | 0.44                       | 0.19                   |
| $\text{NH}_2^\cdot + \text{SiH}_4 \longrightarrow \text{SiH}_3^\cdot + \text{NH}_3$                                         | 0.0                    | 0.18                       | 0.52                          | -0.45                      | -0.65                  |
| $\text{NH}_2^\cdot + \text{NH}_2\text{SiH}_3 \longrightarrow \text{NH}_2\text{SiH}_2^\cdot + \text{NH}_3$                   | 0.0                    | 0.29                       | 0.57                          | -0.53                      | -0.65                  |
| $\text{NH}_2^\cdot + (\text{NH}_2)_2\text{SiH}_2 \longrightarrow (\text{NH}_2)_2\text{SiH}^\cdot + \text{NH}_3$             | 0.0                    | 0.16                       | 0.55                          | -0.43                      | -0.55                  |
| $\text{NH}_2^\cdot + (\text{NH}_2)_3\text{SiH} \longrightarrow (\text{NH}_2)_3\text{Si}^\cdot + \text{NH}_3$                | 0.0                    | 0.22                       | 0.51                          | -0.24                      | -0.44                  |
| $\text{SiH}_4 + \text{H}^\cdot \longrightarrow \text{SiH}_3^\cdot + \text{H}_2$                                             | 0.0                    | 0.21                       | 0.45                          | -0.29                      | -0.40                  |
| $\text{NH}_2\text{SiH}_3 + \text{H}^\cdot \longrightarrow \text{NH}_2\text{SiH}_2^\cdot + \text{H}_2$                       | 0.0                    | 0.24                       | 0.39                          | -0.26                      | -0.37                  |
| $(\text{NH}_2)_2\text{SiH}_2 + \text{H}^\cdot \longrightarrow (\text{NH}_2)_2\text{SiH}^\cdot + \text{H}_2$                 | 0.0                    | 0.24                       | 0.48                          | -0.18                      | -0.31                  |
| $(\text{NH}_2)_3\text{SiH} + \text{H}^\cdot \longrightarrow (\text{NH}_2)_3\text{Si}^\cdot + \text{H}_2$                    | 0.0                    | 0.25                       | 0.46                          | -0.06                      | -0.19                  |

Table 7: Relative Gibbs free energies of reactants ( $\Delta G_r$ ) pre-reaction complexes( $\Delta G_{pk1}$ ), transition states ( $\Delta G^\ddagger$ ), post-reaction complexes ( $\Delta G_{pk2}$ ) and products ( $\Delta G_p$ ) for reactions in silane-ammonia plasma at 200 K and 300 Pa. All Gibbs free energies are calculated with MP2/aug-cc-pVTZ//CASPT2/aug-cc-pVTZ method and vibrational contribution to entropy is calculated with MP2/aug-cc-pVTZ. Entropy of hydrogen molecule is taken from NIST-JANAF thermochemical tables.<sup>1</sup> Relative Gibbs free energies are shown relative to reactants.

| reaction                                                                                                                    | $\Delta G_r/\text{eV}$ | $\Delta G_{pk1}/\text{eV}$ | $\Delta G^\ddagger/\text{eV}$ | $\Delta G_{pk2}/\text{eV}$ | $\Delta G_p/\text{eV}$ |
|-----------------------------------------------------------------------------------------------------------------------------|------------------------|----------------------------|-------------------------------|----------------------------|------------------------|
| $\text{NH}_3 + \text{SiH}_4 \longrightarrow \text{SiH}_3\text{NH}_2 + \text{H}_2$                                           | 0.0                    | 0.18                       | 2.12                          | -0.23                      | -0.35                  |
| $\text{NH}_3 + \text{SiH}_3\text{NH}_2 \longrightarrow \text{SiH}_2(\text{NH}_2)_2 + \text{H}_2$                            | 0.0                    | 0.18                       | 1.79                          | -0.41                      | -0.52                  |
| $\text{NH}_3 + \text{SiH}_2(\text{NH}_2)_2 \longrightarrow \text{SiH}(\text{NH}_2)_3 + \text{H}_2$                          | 0.0                    | 0.11                       | 2.09                          | -0.50                      | -0.59                  |
| $\text{NH}_3 + \text{SiH}(\text{NH}_2)_3 \longrightarrow \text{Si}(\text{NH}_2)_4 + \text{H}_2$                             | 0.0                    | 0.18                       | 2.09                          | -0.49                      | -0.62                  |
| $\text{SiH}_4 + \text{NH}_2\text{SiH}_3 \longrightarrow (\text{SiH}_3)_2\text{NH} + \text{H}_2$                             | 0.0                    | 0.17                       | 2.09                          | -0.38                      | -0.50                  |
| $\text{SiH}_4 + (\text{SiH}_3)_2\text{NH} \longrightarrow (\text{SiH}_3)_3\text{N} + \text{H}_2$                            | 0.0                    | 0.19                       | 2.12                          | -0.40                      | -0.49                  |
| $\text{SiH}_3\text{NH}_2 + (\text{NH}_2)_3\text{SiH} \longrightarrow \text{SiH}_3\text{-NH-Si}(\text{NH}_2)_3 + \text{H}_2$ | 0.0                    | 0.15                       | 2.15                          | -0.55                      | -0.66                  |
| $\text{SiH}_3\text{NH}_2 \longrightarrow \text{SiHNH}_2 + \text{H}_2$                                                       | 0.0                    | -                          | 2.59                          | 1.51                       | 1.38                   |
| $\text{SiH}_2(\text{NH}_2)_2 \longrightarrow \text{Si}(\text{NH}_2)_2 + \text{H}_2$                                         | 0.0                    | -                          | 3.02                          | 1.12                       | 1.01                   |
| $\text{NH}_2^\cdot + \text{SiH}_3^\cdot \longrightarrow \text{SiH}_3\text{NH}_2$                                            | 0.0                    | -                          | -                             | -                          | -4.17                  |
| $\text{NH}_2^\cdot + \text{SiH}_2\text{NH}_2^\cdot \longrightarrow \text{SiH}_2(\text{NH}_2)_2$                             | 0.0                    | -                          | -                             | -                          | -4.44                  |
| $\text{NH}_2^\cdot + \text{SiH}(\text{NH}_2)_2^\cdot \longrightarrow \text{SiH}(\text{NH}_2)_3$                             | 0.0                    | -                          | -                             | -                          | -4.59                  |
| $\text{NH}_2^\cdot + \text{Si}(\text{NH}_2)_3^\cdot \longrightarrow \text{Si}(\text{NH}_2)_4$                               | 0.0                    | -                          | -                             | -                          | -4.68                  |
| $\text{SiH}_3^\cdot + \text{SiH}_3\text{NH}^\cdot \longrightarrow (\text{SiH}_3)_2\text{NH}$                                | 0.0                    | -                          | -                             | -                          | -4.51                  |
| $\text{SiH}_3^\cdot + (\text{SiH}_3)_2\text{N}^\cdot \longrightarrow (\text{SiH}_3)_3\text{N}$                              | 0.0                    | -                          | -                             | -                          | -5.19                  |
| $\text{SiH}_3^\cdot + \text{NH}_3 \longrightarrow \text{SiH}_3\text{NH}_3^\cdot$                                            | 0.0                    | 0.19                       | 0.36                          | -                          | 0.84                   |
| $\text{NH}_2\text{SiH}_2^\cdot + \text{NH}_3 \longrightarrow \text{NH}_2\text{SiH}_2\text{NH}_3^\cdot$                      | 0.0                    | 0.20                       | 0.83                          | -                          | 0.70                   |
| $(\text{NH}_2)_2\text{SiH}^\cdot + \text{NH}_3 \longrightarrow (\text{NH}_2)_2\text{SiHNH}_3^\cdot$                         | 0.0                    | 0.11                       | 0.84                          | -                          | 0.55                   |
| $\text{NH}_3\text{SiH}_3^\cdot \longrightarrow \text{NH}_2\text{SiH}_3 + \text{H}^\cdot$                                    | 0.0                    | -                          | 0.27                          | -0.38                      | -0.62                  |
| $\text{NH}_2\text{SiH}_2\text{NH}_3^\cdot \longrightarrow (\text{NH}_2)_2\text{SiH}_2 + \text{H}^\cdot$                     | 0.0                    | -                          | 0.20                          | -0.55                      | -0.76                  |
| $(\text{NH}_2)_2\text{SiHNH}_3^\cdot \longrightarrow (\text{NH}_2)_3\text{SiH} + \text{H}^\cdot$                            | 0.0                    | -                          | 0.12                          | -0.57                      | -0.82                  |
| $(\text{NH}_2)_3\text{SiNH}_3^\cdot \longrightarrow (\text{NH}_2)_4\text{Si} + \text{H}^\cdot$                              | 0.0                    | -                          | 0.13                          | -0.50                      | -0.69                  |
| $\text{SiH}_2 + \text{NH}_3 \longrightarrow \text{SiH}_2\text{-NH}_3$                                                       | 0.0                    | -                          | -                             | -                          | -0.81                  |
| $\text{SiH}_2 + \text{NH}_2\text{SiH}_3 \longrightarrow \text{SiH}_2\text{-NH}_2\text{SiH}_3$                               | 0.0                    | -                          | -                             | -                          | -0.72                  |
| $\text{SiH}_2 + \text{NH}(\text{SiH}_3)_2 \longrightarrow \text{SiH}_2\text{-NH}(\text{SiH}_3)_2$                           | 0.0                    | -                          | -                             | -                          | -0.61                  |
| $\text{SiH}_2\text{-NH}_3 + \text{NH}_3 \longrightarrow \text{NH}_3\text{-SiH}_2\text{-NH}_3$                               | 0.0                    | 0.23                       | -                             | -                          | 0.19                   |
| $\text{SiH}_2\text{-NH}_3 \longrightarrow \text{SiH}_3\text{NH}_2$                                                          | 0.0                    | -                          | 1.44                          | -                          | -1.74                  |
| $\text{SiH}_2\text{-NH}_2\text{SiH}_3 \longrightarrow \text{NH}(\text{SiH}_3)_2$                                            | 0.0                    | -                          | 1.23                          | -                          | -1.94                  |
| $\text{SiH}_2\text{-NH}(\text{SiH}_3)_2 \longrightarrow \text{N}(\text{SiH}_3)_3$                                           | 0.0                    | -                          | 1.04                          | -                          | -2.05                  |
| $\text{NH}_2^\cdot + \text{SiH}_4 \longrightarrow \text{NH}_2\text{SiH}_3 + \text{H}^\cdot$                                 | 0.0                    | 0.18                       | 0.58                          | -0.30                      | -0.51                  |
| $\text{NH}_2^\cdot + \text{NH}_2\text{SiH}_3 \longrightarrow (\text{NH}_2)_2\text{SiH}_2 + \text{H}^\cdot$                  | 0.0                    | 0.12                       | 0.38                          | -0.48                      | -0.69                  |
| $\text{NH}_2^\cdot + (\text{NH}_2)_2\text{SiH}_2 \longrightarrow (\text{NH}_2)_3\text{SiH} + \text{H}^\cdot$                | 0.0                    | 0.09                       | 0.31                          | -0.58                      | -0.87                  |
| $\text{NH}_2^\cdot + (\text{NH}_2)_3\text{SiH} \longrightarrow (\text{NH}_2)_4\text{Si} + \text{H}^\cdot$                   | 0.0                    | 0.21                       | 0.44                          | -0.62                      | -0.83                  |
| $\text{SiH}_3^\cdot + \text{SiH}_4 \longrightarrow \text{SiH}_4 + \text{SiH}_3^\cdot$                                       | 0.0                    | 0.26                       | 0.58                          | 0.26                       | 0.01                   |
| $\text{SiH}_3^\cdot + \text{NH}_2\text{SiH}_3 \longrightarrow \text{NH}_2\text{SiH}_2^\cdot + \text{SiH}_4$                 | 0.0                    | 0.19                       | 0.61                          | 0.17                       | 0.02                   |
| $\text{SiH}_3^\cdot + (\text{NH}_2)_2\text{SiH}_2 \longrightarrow (\text{NH}_2)_2\text{SiH}^\cdot + \text{SiH}_4$           | 0.0                    | 0.17                       | 0.63                          | 0.26                       | 0.07                   |
| $\text{SiH}_3^\cdot + (\text{NH}_2)_3\text{SiH} \longrightarrow (\text{NH}_2)_3\text{Si}^\cdot + \text{SiH}_4$              | 0.0                    | 0.21                       | 0.81                          | 0.43                       | 0.19                   |
| $\text{NH}_2^\cdot + \text{SiH}_4 \longrightarrow \text{SiH}_3^\cdot + \text{NH}_3$                                         | 0.0                    | 0.17                       | 0.51                          | -0.46                      | -0.65                  |
| $\text{NH}_2^\cdot + \text{NH}_2\text{SiH}_3 \longrightarrow \text{NH}_2\text{SiH}_2^\cdot + \text{NH}_3$                   | 0.0                    | 0.28                       | 0.56                          | -0.54                      | -0.65                  |
| $\text{NH}_2^\cdot + (\text{NH}_2)_2\text{SiH}_2 \longrightarrow (\text{NH}_2)_2\text{SiH}^\cdot + \text{NH}_3$             | 0.0                    | 0.15                       | 0.54                          | -0.43                      | -0.55                  |
| $\text{NH}_2^\cdot + (\text{NH}_2)_3\text{SiH} \longrightarrow (\text{NH}_2)_3\text{Si}^\cdot + \text{NH}_3$                | 0.0                    | 0.22                       | 0.50                          | -0.25                      | -0.44                  |
| $\text{SiH}_4 + \text{H}^\cdot \longrightarrow \text{SiH}_3^\cdot + \text{H}_2$                                             | 0.0                    | 0.20                       | 0.45                          | -0.30                      | -0.40                  |
| $\text{NH}_2\text{SiH}_3 + \text{H}^\cdot \longrightarrow \text{NH}_2\text{SiH}_2^\cdot + \text{H}_2$                       | 0.0                    | 0.24                       | 0.38                          | -0.27                      | -0.37                  |
| $(\text{NH}_2)_2\text{SiH}_2 + \text{H}^\cdot \longrightarrow (\text{NH}_2)_2\text{SiH}^\cdot + \text{H}_2$                 | 0.0                    | 0.23                       | 0.47                          | -0.19                      | -0.32                  |
| $(\text{NH}_2)_3\text{SiH} + \text{H}^\cdot \longrightarrow (\text{NH}_2)_3\text{Si}^\cdot + \text{H}_2$                    | 0.0                    | 0.24                       | 0.45                          | -0.07                      | -0.20                  |

Table 8: Relative Gibbs free energies of reactants ( $\Delta G_r$ ) pre-reaction complexes( $\Delta G_{pk1}$ ), transition states ( $\Delta G^\ddagger$ ), post-reaction complexes ( $\Delta G_{pk2}$ ) and products ( $\Delta G_p$ ) for reactions in silane-ammonia plasma at 200 K and 400 Pa. All Gibbs free energies are calculated with MP2/aug-cc-pVTZ//CASPT2/aug-cc-pVTZ method and vibrational contribution to entropy is calculated with MP2/aug-cc-pVTZ. Entropy of hydrogen molecule is taken from NIST-JANAF thermochemical tables.<sup>1</sup> Relative Gibbs free energies are shown relative to reactants.

| reaction                                                                                                                    | $\Delta G_r/\text{eV}$ | $\Delta G_{pk1}/\text{eV}$ | $\Delta G^\ddagger/\text{eV}$ | $\Delta G_{pk2}/\text{eV}$ | $\Delta G_p/\text{eV}$ |
|-----------------------------------------------------------------------------------------------------------------------------|------------------------|----------------------------|-------------------------------|----------------------------|------------------------|
| $\text{NH}_3 + \text{SiH}_4 \longrightarrow \text{SiH}_3\text{NH}_2 + \text{H}_2$                                           | 0.0                    | 0.17                       | 2.11                          | -0.24                      | -0.36                  |
| $\text{NH}_3 + \text{SiH}_3\text{NH}_2 \longrightarrow \text{SiH}_2(\text{NH}_2)_2 + \text{H}_2$                            | 0.0                    | 0.17                       | 1.79                          | -0.42                      | -0.53                  |
| $\text{NH}_3 + \text{SiH}_2(\text{NH}_2)_2 \longrightarrow \text{SiH}(\text{NH}_2)_3 + \text{H}_2$                          | 0.0                    | 0.11                       | 2.08                          | -0.50                      | -0.59                  |
| $\text{NH}_3 + \text{SiH}(\text{NH}_2)_3 \longrightarrow \text{Si}(\text{NH}_2)_4 + \text{H}_2$                             | 0.0                    | 0.18                       | 2.08                          | -0.49                      | -0.62                  |
| $\text{SiH}_4 + \text{NH}_2\text{SiH}_3 \longrightarrow (\text{SiH}_3)_2\text{NH} + \text{H}_2$                             | 0.0                    | 0.16                       | 2.09                          | -0.38                      | -0.50                  |
| $\text{SiH}_4 + (\text{SiH}_3)_2\text{NH} \longrightarrow (\text{SiH}_3)_3\text{N} + \text{H}_2$                            | 0.0                    | 0.19                       | 2.11                          | -0.41                      | -0.49                  |
| $\text{SiH}_3\text{NH}_2 + (\text{NH}_2)_3\text{SiH} \longrightarrow \text{SiH}_3\text{-NH-Si}(\text{NH}_2)_3 + \text{H}_2$ | 0.0                    | 0.14                       | 2.15                          | -0.55                      | -0.66                  |
| $\text{SiH}_3\text{NH}_2 \longrightarrow \text{SiHNH}_2 + \text{H}_2$                                                       | 0.0                    | -                          | 2.59                          | 1.51                       | 1.38                   |
| $\text{SiH}_2(\text{NH}_2)_2 \longrightarrow \text{Si}(\text{NH}_2)_2 + \text{H}_2$                                         | 0.0                    | -                          | 3.02                          | 1.12                       | 1.01                   |
| $\text{NH}_2^\cdot + \text{SiH}_3^\cdot \longrightarrow \text{SiH}_3\text{NH}_2$                                            | 0.0                    | -                          | -                             | -                          | -4.18                  |
| $\text{NH}_2^\cdot + \text{SiH}_2\text{NH}_2^\cdot \longrightarrow \text{SiH}_2(\text{NH}_2)_2$                             | 0.0                    | -                          | -                             | -                          | -4.45                  |
| $\text{NH}_2^\cdot + \text{SiH}(\text{NH}_2)_2^\cdot \longrightarrow \text{SiH}(\text{NH}_2)_3$                             | 0.0                    | -                          | -                             | -                          | -4.60                  |
| $\text{NH}_2^\cdot + \text{Si}(\text{NH}_2)_3^\cdot \longrightarrow \text{Si}(\text{NH}_2)_4$                               | 0.0                    | -                          | -                             | -                          | -4.68                  |
| $\text{SiH}_3^\cdot + \text{SiH}_3\text{NH}^\cdot \longrightarrow (\text{SiH}_3)_2\text{NH}$                                | 0.0                    | -                          | -                             | -                          | -4.51                  |
| $\text{SiH}_3^\cdot + (\text{SiH}_3)_2\text{N}^\cdot \longrightarrow (\text{SiH}_3)_3\text{N}$                              | 0.0                    | -                          | -                             | -                          | -5.19                  |
| $\text{SiH}_3^\cdot + \text{NH}_3 \longrightarrow \text{SiH}_3\text{NH}_3^\cdot$                                            | 0.0                    | 0.19                       | 0.36                          | -                          | 0.83                   |
| $\text{NH}_2\text{SiH}_2^\cdot + \text{NH}_3 \longrightarrow \text{NH}_2\text{SiH}_2\text{NH}_3^\cdot$                      | 0.0                    | 0.20                       | 0.83                          | -                          | 0.70                   |
| $(\text{NH}_2)_2\text{SiH}^\cdot + \text{NH}_3 \longrightarrow (\text{NH}_2)_2\text{SiHNH}_3^\cdot$                         | 0.0                    | 0.11                       | 0.84                          | -                          | 0.55                   |
| $\text{NH}_3\text{SiH}_3^\cdot \longrightarrow \text{NH}_2\text{SiH}_3 + \text{H}^\cdot$                                    | 0.0                    | -                          | 0.27                          | -0.38                      | -0.61                  |
| $\text{NH}_2\text{SiH}_2\text{NH}_3^\cdot \longrightarrow (\text{NH}_2)_2\text{SiH}_2 + \text{H}^\cdot$                     | 0.0                    | -                          | 0.20                          | -0.55                      | -0.76                  |
| $(\text{NH}_2)_2\text{SiHNH}_3^\cdot \longrightarrow (\text{NH}_2)_3\text{SiH} + \text{H}^\cdot$                            | 0.0                    | -                          | 0.12                          | -0.57                      | -0.81                  |
| $(\text{NH}_2)_3\text{SiNH}_3^\cdot \longrightarrow (\text{NH}_2)_4\text{Si} + \text{H}^\cdot$                              | 0.0                    | -                          | 0.13                          | -0.50                      | -0.69                  |
| $\text{SiH}_2 + \text{NH}_3 \longrightarrow \text{SiH}_2\text{-NH}_3$                                                       | 0.0                    | -                          | -                             | -                          | -0.81                  |
| $\text{SiH}_2 + \text{NH}_2\text{SiH}_3 \longrightarrow \text{SiH}_2\text{-NH}_2\text{SiH}_3$                               | 0.0                    | -                          | -                             | -                          | -0.72                  |
| $\text{SiH}_2 + \text{NH}(\text{SiH}_3)_2 \longrightarrow \text{SiH}_2\text{-NH}(\text{SiH}_3)_2$                           | 0.0                    | -                          | -                             | -                          | -0.61                  |
| $\text{SiH}_2\text{-NH}_3 + \text{NH}_3 \longrightarrow \text{NH}_3\text{-SiH}_2\text{-NH}_3$                               | 0.0                    | 0.22                       | -                             | -                          | 0.18                   |
| $\text{SiH}_2\text{-NH}_3 \longrightarrow \text{SiH}_3\text{NH}_2$                                                          | 0.0                    | -                          | 1.44                          | -                          | -1.74                  |
| $\text{SiH}_2\text{-NH}_2\text{SiH}_3 \longrightarrow \text{NH}(\text{SiH}_3)_2$                                            | 0.0                    | -                          | 1.23                          | -                          | -1.94                  |
| $\text{SiH}_2\text{-NH}(\text{SiH}_3)_2 \longrightarrow \text{N}(\text{SiH}_3)_3$                                           | 0.0                    | -                          | 1.04                          | -                          | -2.05                  |
| $\text{NH}_2^\cdot + \text{SiH}_4 \longrightarrow \text{NH}_2\text{SiH}_3 + \text{H}^\cdot$                                 | 0.0                    | 0.17                       | 0.58                          | -0.30                      | -0.51                  |
| $\text{NH}_2^\cdot + \text{NH}_2\text{SiH}_3 \longrightarrow (\text{NH}_2)_2\text{SiH}_2 + \text{H}^\cdot$                  | 0.0                    | 0.11                       | 0.37                          | -0.48                      | -0.69                  |
| $\text{NH}_2^\cdot + (\text{NH}_2)_2\text{SiH}_2 \longrightarrow (\text{NH}_2)_3\text{SiH} + \text{H}^\cdot$                | 0.0                    | 0.08                       | 0.30                          | -0.59                      | -0.87                  |
| $\text{NH}_2^\cdot + (\text{NH}_2)_3\text{SiH} \longrightarrow (\text{NH}_2)_4\text{Si} + \text{H}^\cdot$                   | 0.0                    | 0.21                       | 0.44                          | -0.62                      | -0.83                  |
| $\text{SiH}_3^\cdot + \text{SiH}_4 \longrightarrow \text{SiH}_4 + \text{SiH}_3^\cdot$                                       | 0.0                    | 0.25                       | 0.57                          | 0.25                       | 0.01                   |
| $\text{SiH}_3^\cdot + \text{NH}_2\text{SiH}_3 \longrightarrow \text{NH}_2\text{SiH}_2^\cdot + \text{SiH}_4$                 | 0.0                    | 0.18                       | 0.60                          | 0.17                       | 0.02                   |
| $\text{SiH}_3^\cdot + (\text{NH}_2)_2\text{SiH}_2 \longrightarrow (\text{NH}_2)_2\text{SiH}^\cdot + \text{SiH}_4$           | 0.0                    | 0.16                       | 0.62                          | 0.25                       | 0.07                   |
| $\text{SiH}_3^\cdot + (\text{NH}_2)_3\text{SiH} \longrightarrow (\text{NH}_2)_3\text{Si}^\cdot + \text{SiH}_4$              | 0.0                    | 0.21                       | 0.80                          | 0.43                       | 0.19                   |
| $\text{NH}_2^\cdot + \text{SiH}_4 \longrightarrow \text{SiH}_3^\cdot + \text{NH}_3$                                         | 0.0                    | 0.16                       | 0.50                          | -0.46                      | -0.65                  |
| $\text{NH}_2^\cdot + \text{NH}_2\text{SiH}_3 \longrightarrow \text{NH}_2\text{SiH}_2^\cdot + \text{NH}_3$                   | 0.0                    | 0.28                       | 0.55                          | -0.54                      | -0.65                  |
| $\text{NH}_2^\cdot + (\text{NH}_2)_2\text{SiH}_2 \longrightarrow (\text{NH}_2)_2\text{SiH}^\cdot + \text{NH}_3$             | 0.0                    | 0.15                       | 0.53                          | -0.44                      | -0.55                  |
| $\text{NH}_2^\cdot + (\text{NH}_2)_3\text{SiH} \longrightarrow (\text{NH}_2)_3\text{Si}^\cdot + \text{NH}_3$                | 0.0                    | 0.21                       | 0.50                          | -0.26                      | -0.44                  |
| $\text{SiH}_4 + \text{H}^\cdot \longrightarrow \text{SiH}_3^\cdot + \text{H}_2$                                             | 0.0                    | 0.20                       | 0.44                          | -0.31                      | -0.41                  |
| $\text{NH}_2\text{SiH}_3 + \text{H}^\cdot \longrightarrow \text{NH}_2\text{SiH}_2^\cdot + \text{H}_2$                       | 0.0                    | 0.23                       | 0.37                          | -0.27                      | -0.38                  |
| $(\text{NH}_2)_2\text{SiH}_2 + \text{H}^\cdot \longrightarrow (\text{NH}_2)_2\text{SiH}^\cdot + \text{H}_2$                 | 0.0                    | 0.23                       | 0.46                          | -0.19                      | -0.32                  |
| $(\text{NH}_2)_3\text{SiH} + \text{H}^\cdot \longrightarrow (\text{NH}_2)_3\text{Si}^\cdot + \text{H}_2$                    | 0.0                    | 0.23                       | 0.45                          | -0.07                      | -0.20                  |

Table 9: Relative Gibbs free energies of reactants ( $\Delta G_r$ ) pre-reaction complexes( $\Delta G_{pk1}$ ), transition states ( $\Delta G^\ddagger$ ), post-reaction complexes ( $\Delta G_{pk2}$ ) and products ( $\Delta G_p$ ) for reactions in silane-ammonia plasma at 200 K and 500 Pa. All Gibbs free energies are calculated with MP2/aug-cc-pVTZ//CASPT2/aug-cc-pVTZ method and vibrational contribution to entropy is calculated with MP2/aug-cc-pVTZ. Entropy of hydrogen molecule is taken from NIST-JANAF thermochemical tables.<sup>1</sup> Relative Gibbs free energies are shown relative to reactants.

| reaction                                                                                                                | $\Delta G_r/\text{eV}$ | $\Delta G_{pk1}/\text{eV}$ | $\Delta G^\ddagger/\text{eV}$ | $\Delta G_{pk2}/\text{eV}$ | $\Delta G_p/\text{eV}$ |
|-------------------------------------------------------------------------------------------------------------------------|------------------------|----------------------------|-------------------------------|----------------------------|------------------------|
| $\text{NH}_3 + \text{SiH}_4 \rightarrow \text{SiH}_3\text{NH}_2 + \text{H}_2$                                           | 0.0                    | 0.17                       | 2.11                          | -0.24                      | -0.36                  |
| $\text{NH}_3 + \text{SiH}_3\text{NH}_2 \rightarrow \text{SiH}_2(\text{NH}_2)_2 + \text{H}_2$                            | 0.0                    | 0.17                       | 1.79                          | -0.42                      | -0.53                  |
| $\text{NH}_3 + \text{SiH}_2(\text{NH}_2)_2 \rightarrow \text{SiH}(\text{NH}_2)_3 + \text{H}_2$                          | 0.0                    | 0.10                       | 2.08                          | -0.50                      | -0.60                  |
| $\text{NH}_3 + \text{SiH}(\text{NH}_2)_3 \rightarrow \text{Si}(\text{NH}_2)_4 + \text{H}_2$                             | 0.0                    | 0.17                       | 2.08                          | -0.50                      | -0.62                  |
| $\text{SiH}_4 + \text{NH}_2\text{SiH}_3 \rightarrow (\text{SiH}_3)_2\text{NH} + \text{H}_2$                             | 0.0                    | 0.16                       | 2.08                          | -0.39                      | -0.51                  |
| $\text{SiH}_4 + (\text{SiH}_3)_2\text{NH} \rightarrow (\text{SiH}_3)_3\text{N} + \text{H}_2$                            | 0.0                    | 0.19                       | 2.11                          | -0.41                      | -0.49                  |
| $\text{SiH}_3\text{NH}_2 + (\text{NH}_2)_3\text{SiH} \rightarrow \text{SiH}_3\text{-NH-Si}(\text{NH}_2)_3 + \text{H}_2$ | 0.0                    | 0.14                       | 2.14                          | -0.56                      | -0.66                  |
| $\text{SiH}_3\text{NH}_2 \rightarrow \text{SiHNH}_2 + \text{H}_2$                                                       | 0.0                    | -                          | 2.59                          | 1.51                       | 1.38                   |
| $\text{SiH}_2(\text{NH}_2)_2 \rightarrow \text{Si}(\text{NH}_2)_2 + \text{H}_2$                                         | 0.0                    | -                          | 3.02                          | 1.12                       | 1.01                   |
| $\text{NH}_2 + \text{SiH}_3 \rightarrow \text{SiH}_3\text{NH}_2$                                                        | 0.0                    | -                          | -                             | -                          | -4.18                  |
| $\text{NH}_2 + \text{SiH}_2\text{NH}_2 \rightarrow \text{SiH}_2(\text{NH}_2)_2$                                         | 0.0                    | -                          | -                             | -                          | -4.45                  |
| $\text{NH}_2 + \text{SiH}(\text{NH}_2)_2 \rightarrow \text{SiH}(\text{NH}_2)_3$                                         | 0.0                    | -                          | -                             | -                          | -4.60                  |
| $\text{NH}_2 + \text{Si}(\text{NH}_2)_3 \rightarrow \text{Si}(\text{NH}_2)_4$                                           | 0.0                    | -                          | -                             | -                          | -4.68                  |
| $\text{SiH}_3 + \text{SiH}_3\text{NH} \rightarrow (\text{SiH}_3)_2\text{NH}$                                            | 0.0                    | -                          | -                             | -                          | -4.52                  |
| $\text{SiH}_3 + (\text{SiH}_3)_2\text{N} \rightarrow (\text{SiH}_3)_3\text{N}$                                          | 0.0                    | -                          | -                             | -                          | -5.20                  |
| $\text{SiH}_3 + \text{NH}_3 \rightarrow \text{SiH}_3\text{NH}_3$                                                        | 0.0                    | 0.18                       | 0.36                          | -                          | 0.83                   |
| $\text{NH}_2\text{SiH}_2 + \text{NH}_3 \rightarrow \text{NH}_2\text{SiH}_2\text{NH}_3$                                  | 0.0                    | 0.19                       | 0.82                          | -                          | 0.70                   |
| $(\text{NH}_2)_2\text{SiH} + \text{NH}_3 \rightarrow (\text{NH}_2)_2\text{SiHNH}_3$                                     | 0.0                    | 0.10                       | 0.83                          | -                          | 0.55                   |
| $\text{NH}_3\text{SiH}_3 \rightarrow \text{NH}_2\text{SiH}_3 + \text{H}$                                                | 0.0                    | -                          | 0.27                          | -0.38                      | -0.61                  |
| $\text{NH}_2\text{SiH}_2\text{NH}_3 \rightarrow (\text{NH}_2)_2\text{SiH}_2 + \text{H}$                                 | 0.0                    | -                          | 0.20                          | -0.55                      | -0.76                  |
| $(\text{NH}_2)_2\text{SiHNH}_3 \rightarrow (\text{NH}_2)_3\text{SiH} + \text{H}$                                        | 0.0                    | -                          | 0.12                          | -0.57                      | -0.81                  |
| $(\text{NH}_2)_3\text{SiNH}_3 \rightarrow (\text{NH}_2)_4\text{Si} + \text{H}$                                          | 0.0                    | -                          | 0.13                          | -0.50                      | -0.68                  |
| $\text{SiH}_2 + \text{NH}_3 \rightarrow \text{SiH}_2\text{-NH}_3$                                                       | 0.0                    | -                          | -                             | -                          | -0.82                  |
| $\text{SiH}_2 + \text{NH}_2\text{SiH}_3 \rightarrow \text{SiH}_2\text{-NH}_2\text{SiH}_3$                               | 0.0                    | -                          | -                             | -                          | -0.73                  |
| $\text{SiH}_2 + \text{NH}(\text{SiH}_3)_2 \rightarrow \text{SiH}_2\text{-NH}(\text{SiH}_3)_2$                           | 0.0                    | -                          | -                             | -                          | -0.62                  |
| $\text{SiH}_2\text{-NH}_3 + \text{NH}_3 \rightarrow \text{NH}_3\text{-SiH}_2\text{-NH}_3$                               | 0.0                    | 0.22                       | -                             | -                          | 0.18                   |
| $\text{SiH}_2\text{-NH}_3 \rightarrow \text{SiH}_3\text{NH}_2$                                                          | 0.0                    | -                          | 1.44                          | -                          | -1.74                  |
| $\text{SiH}_2\text{-NH}_2\text{SiH}_3 \rightarrow \text{NH}(\text{SiH}_3)_2$                                            | 0.0                    | -                          | 1.23                          | -                          | -1.94                  |
| $\text{SiH}_2\text{-NH}(\text{SiH}_3)_2 \rightarrow \text{N}(\text{SiH}_3)_3$                                           | 0.0                    | -                          | 1.04                          | -                          | -2.05                  |
| $\text{NH}_2 + \text{SiH}_4 \rightarrow \text{NH}_2\text{SiH}_3 + \text{H}$                                             | 0.0                    | 0.17                       | 0.57                          | -0.31                      | -0.51                  |
| $\text{NH}_2 + \text{NH}_2\text{SiH}_3 \rightarrow (\text{NH}_2)_2\text{SiH}_2 + \text{H}$                              | 0.0                    | 0.11                       | 0.37                          | -0.49                      | -0.69                  |
| $\text{NH}_2 + (\text{NH}_2)_2\text{SiH}_2 \rightarrow (\text{NH}_2)_3\text{SiH} + \text{H}$                            | 0.0                    | 0.08                       | 0.30                          | -0.59                      | -0.87                  |
| $\text{NH}_2 + (\text{NH}_2)_3\text{SiH} \rightarrow (\text{NH}_2)_4\text{Si} + \text{H}$                               | 0.0                    | 0.21                       | 0.43                          | -0.63                      | -0.83                  |
| $\text{SiH}_3 + \text{SiH}_4 \rightarrow \text{SiH}_4 + \text{SiH}_3$                                                   | 0.0                    | 0.25                       | 0.57                          | 0.25                       | 0.01                   |
| $\text{SiH}_3 + \text{NH}_2\text{SiH}_3 \rightarrow \text{NH}_2\text{SiH}_2 + \text{SiH}_4$                             | 0.0                    | 0.18                       | 0.60                          | 0.16                       | 0.02                   |
| $\text{SiH}_3 + (\text{NH}_2)_2\text{SiH}_2 \rightarrow (\text{NH}_2)_2\text{SiH} + \text{SiH}_4$                       | 0.0                    | 0.16                       | 0.62                          | 0.25                       | 0.07                   |
| $\text{SiH}_3 + (\text{NH}_2)_3\text{SiH} \rightarrow (\text{NH}_2)_3\text{Si} + \text{SiH}_4$                          | 0.0                    | 0.20                       | 0.80                          | 0.42                       | 0.19                   |
| $\text{NH}_2 + \text{SiH}_4 \rightarrow \text{SiH}_3 + \text{NH}_3$                                                     | 0.0                    | 0.16                       | 0.50                          | -0.47                      | -0.65                  |
| $\text{NH}_2 + \text{NH}_2\text{SiH}_3 \rightarrow \text{NH}_2\text{SiH}_2 + \text{NH}_3$                               | 0.0                    | 0.27                       | 0.55                          | -0.55                      | -0.65                  |
| $\text{NH}_2 + (\text{NH}_2)_2\text{SiH}_2 \rightarrow (\text{NH}_2)_2\text{SiH} + \text{NH}_3$                         | 0.0                    | 0.14                       | 0.53                          | -0.44                      | -0.55                  |
| $\text{NH}_2 + (\text{NH}_2)_3\text{SiH} \rightarrow (\text{NH}_2)_3\text{Si} + \text{NH}_3$                            | 0.0                    | 0.21                       | 0.50                          | -0.26                      | -0.44                  |
| $\text{SiH}_4 + \text{H} \rightarrow \text{SiH}_3 + \text{H}_2$                                                         | 0.0                    | 0.19                       | 0.44                          | -0.31                      | -0.41                  |
| $\text{NH}_2\text{SiH}_3 + \text{H} \rightarrow \text{NH}_2\text{SiH}_2 + \text{H}_2$                                   | 0.0                    | 0.23                       | 0.37                          | -0.27                      | -0.38                  |
| $(\text{NH}_2)_2\text{SiH}_2 + \text{H} \rightarrow (\text{NH}_2)_2\text{SiH} + \text{H}_2$                             | 0.0                    | 0.22                       | 0.46                          | -0.19                      | -0.33                  |
| $(\text{NH}_2)_3\text{SiH} + \text{H} \rightarrow (\text{NH}_2)_3\text{Si} + \text{H}_2$                                | 0.0                    | 0.23                       | 0.44                          | -0.07                      | -0.21                  |

Table 10: Relative Gibbs free energies of reactants ( $\Delta G_r$ ), pre-reaction complexes( $\Delta G_{pk1}$ ), transition states ( $\Delta G^\ddagger$ ), post-reaction complexes ( $\Delta G_{pk2}$ ) and products ( $\Delta G_p$ ) for reactions in silane-ammonia plasma at 250 K and 50 Pa. All Gibbs free energies are calculated with MP2/aug-cc-pVTZ//CASPT2/aug-cc-pVTZ method and vibrational contribution to entropy is calculated with MP2/aug-cc-pVTZ. Entropy of hydrogen molecule is taken from NIST-JANAF thermochemical tables.<sup>1</sup> Relative Gibbs free energies are shown relative to reactants.

| reaction                                                                                                                    | $\Delta G_r/\text{eV}$ | $\Delta G_{pk1}/\text{eV}$ | $\Delta G^\ddagger/\text{eV}$ | $\Delta G_{pk2}/\text{eV}$ | $\Delta G_p/\text{eV}$ |
|-----------------------------------------------------------------------------------------------------------------------------|------------------------|----------------------------|-------------------------------|----------------------------|------------------------|
| $\text{NH}_3 + \text{SiH}_4 \longrightarrow \text{SiH}_3\text{NH}_2 + \text{H}_2$                                           | 0.0                    | 0.26                       | 2.25                          | -0.13                      | -0.28                  |
| $\text{NH}_3 + \text{SiH}_3\text{NH}_2 \longrightarrow \text{SiH}_2(\text{NH}_2)_2 + \text{H}_2$                            | 0.0                    | 0.29                       | 1.94                          | -0.30                      | -0.44                  |
| $\text{NH}_3 + \text{SiH}_2(\text{NH}_2)_2 \longrightarrow \text{SiH}(\text{NH}_2)_3 + \text{H}_2$                          | 0.0                    | 0.22                       | 2.23                          | -0.39                      | -0.50                  |
| $\text{NH}_3 + \text{SiH}(\text{NH}_2)_3 \longrightarrow \text{Si}(\text{NH}_2)_4 + \text{H}_2$                             | 0.0                    | 0.30                       | 2.23                          | -0.36                      | -0.53                  |
| $\text{SiH}_4 + \text{NH}_2\text{SiH}_3 \longrightarrow (\text{SiH}_3)_2\text{NH} + \text{H}_2$                             | 0.0                    | 0.28                       | 2.23                          | -0.28                      | -0.43                  |
| $\text{SiH}_4 + (\text{SiH}_3)_2\text{NH} \longrightarrow (\text{SiH}_3)_3\text{N} + \text{H}_2$                            | 0.0                    | 0.32                       | 2.26                          | -0.28                      | -0.39                  |
| $\text{SiH}_3\text{NH}_2 + (\text{NH}_2)_3\text{SiH} \longrightarrow \text{SiH}_3\text{-NH-Si}(\text{NH}_2)_3 + \text{H}_2$ | 0.0                    | 0.28                       | 2.31                          | -0.42                      | -0.56                  |
| $\text{SiH}_3\text{NH}_2 \longrightarrow \text{SiHNH}_2 + \text{H}_2$                                                       | 0.0                    | -                          | 2.59                          | 1.48                       | 1.33                   |
| $\text{SiH}_2(\text{NH}_2)_2 \longrightarrow \text{Si}(\text{NH}_2)_2 + \text{H}_2$                                         | 0.0                    | -                          | 3.02                          | 1.09                       | 0.96                   |
| $\text{NH}_2 + \text{SiH}_3 \longrightarrow \text{SiH}_3\text{NH}_2$                                                        | 0.0                    | -                          | -                             | -                          | -4.04                  |
| $\text{NH}_2 + \text{SiH}_2\text{NH}_2 \longrightarrow \text{SiH}_2(\text{NH}_2)_2$                                         | 0.0                    | -                          | -                             | -                          | -4.29                  |
| $\text{NH}_2 + \text{SiH}(\text{NH}_2)_2 \longrightarrow \text{SiH}(\text{NH}_2)_3$                                         | 0.0                    | -                          | -                             | -                          | -4.44                  |
| $\text{NH}_2 + \text{Si}(\text{NH}_2)_3 \longrightarrow \text{Si}(\text{NH}_2)_4$                                           | 0.0                    | -                          | -                             | -                          | -4.52                  |
| $\text{SiH}_3 + \text{SiH}_3\text{NH} \longrightarrow (\text{SiH}_3)_2\text{NH}$                                            | 0.0                    | -                          | -                             | -                          | -4.36                  |
| $\text{SiH}_3 + (\text{SiH}_3)_2\text{N} \longrightarrow (\text{SiH}_3)_3\text{N}$                                          | 0.0                    | -                          | -                             | -                          | -5.03                  |
| $\text{SiH}_3 + \text{NH}_3 \longrightarrow \text{SiH}_3\text{NH}_3$                                                        | 0.0                    | 0.30                       | 0.49                          | -                          | 0.97                   |
| $\text{NH}_2\text{SiH}_2 + \text{NH}_3 \longrightarrow \text{NH}_2\text{SiH}_2\text{NH}_3$                                  | 0.0                    | 0.31                       | 0.97                          | -                          | 0.84                   |
| $(\text{NH}_2)_2\text{SiH} + \text{NH}_3 \longrightarrow (\text{NH}_2)_2\text{SiHNH}_3$                                     | 0.0                    | 0.22                       | 0.99                          | -                          | 0.70                   |
| $\text{NH}_3\text{SiH}_3 \longrightarrow \text{NH}_2\text{SiH}_3 + \text{H}$                                                | 0.0                    | -                          | 0.27                          | -0.38                      | -0.73                  |
| $\text{NH}_2\text{SiH}_2\text{NH}_3 \longrightarrow (\text{NH}_2)_2\text{SiH}_2 + \text{H}$                                 | 0.0                    | -                          | 0.20                          | -0.55                      | -0.88                  |
| $(\text{NH}_2)_2\text{SiHNH}_3 \longrightarrow (\text{NH}_2)_3\text{SiH} + \text{H}$                                        | 0.0                    | -                          | 0.12                          | -0.57                      | -0.93                  |
| $(\text{NH}_2)_3\text{SiNH}_3 \longrightarrow (\text{NH}_2)_4\text{Si} + \text{H}$                                          | 0.0                    | -                          | 0.14                          | -0.52                      | -0.80                  |
| $\text{SiH}_2 + \text{NH}_3 \longrightarrow \text{SiH}_2\text{-NH}_3$                                                       | 0.0                    | -                          | -                             | -                          | -0.68                  |
| $\text{SiH}_2 + \text{NH}_2\text{SiH}_3 \longrightarrow \text{SiH}_2\text{-NH}_2\text{SiH}_3$                               | 0.0                    | -                          | -                             | -                          | -0.57                  |
| $\text{SiH}_2 + \text{NH}(\text{SiH}_3)_2 \longrightarrow \text{SiH}_2\text{-NH}(\text{SiH}_3)_2$                           | 0.0                    | -                          | -                             | -                          | -0.47                  |
| $\text{SiH}_2\text{-NH}_3 + \text{NH}_3 \longrightarrow \text{NH}_3\text{-SiH}_2\text{-NH}_3$                               | 0.0                    | 0.34                       | -                             | -                          | 0.31                   |
| $\text{SiH}_2\text{-NH}_3 \longrightarrow \text{SiH}_3\text{NH}_2$                                                          | 0.0                    | -                          | 1.44                          | -                          | -1.74                  |
| $\text{SiH}_2\text{-NH}_2\text{SiH}_3 \longrightarrow \text{NH}(\text{SiH}_3)_2$                                            | 0.0                    | -                          | 1.23                          | -                          | -1.94                  |
| $\text{SiH}_2\text{-NH}(\text{SiH}_3)_2 \longrightarrow \text{N}(\text{SiH}_3)_3$                                           | 0.0                    | -                          | 1.04                          | -                          | -2.04                  |
| $\text{NH}_2 + \text{SiH}_4 \longrightarrow \text{NH}_2\text{SiH}_3 + \text{H}$                                             | 0.0                    | 0.28                       | 0.71                          | -0.19                      | -0.50                  |
| $\text{NH}_2 + \text{NH}_2\text{SiH}_3 \longrightarrow (\text{NH}_2)_2\text{SiH}_2 + \text{H}$                              | 0.0                    | 0.23                       | 0.52                          | -0.35                      | -0.66                  |
| $\text{NH}_2 + (\text{NH}_2)_2\text{SiH}_2 \longrightarrow (\text{NH}_2)_3\text{SiH} + \text{H}$                            | 0.0                    | 0.21                       | 0.45                          | -0.46                      | -0.85                  |
| $\text{NH}_2 + (\text{NH}_2)_3\text{SiH} \longrightarrow (\text{NH}_2)_4\text{Si} + \text{H}$                               | 0.0                    | 0.34                       | 0.59                          | -0.49                      | -0.80                  |
| $\text{SiH}_3 + \text{SiH}_4 \longrightarrow \text{SiH}_4 + \text{SiH}_3$                                                   | 0.0                    | 0.39                       | 0.69                          | 0.39                       | 0.01                   |
| $\text{SiH}_3 + \text{NH}_2\text{SiH}_3 \longrightarrow \text{NH}_2\text{SiH}_2 + \text{SiH}_4$                             | 0.0                    | 0.29                       | 0.72                          | 0.27                       | 0.03                   |
| $\text{SiH}_3 + (\text{NH}_2)_2\text{SiH}_2 \longrightarrow (\text{NH}_2)_2\text{SiH} + \text{SiH}_4$                       | 0.0                    | 0.28                       | 0.75                          | 0.37                       | 0.07                   |
| $\text{SiH}_3 + (\text{NH}_2)_3\text{SiH} \longrightarrow (\text{NH}_2)_3\text{Si} + \text{SiH}_4$                          | 0.0                    | 0.32                       | 0.93                          | 0.55                       | 0.19                   |
| $\text{NH}_2 + \text{SiH}_4 \longrightarrow \text{SiH}_3 + \text{NH}_3$                                                     | 0.0                    | 0.27                       | 0.62                          | -0.38                      | -0.65                  |
| $\text{NH}_2 + \text{NH}_2\text{SiH}_3 \longrightarrow \text{NH}_2\text{SiH}_2 + \text{NH}_3$                               | 0.0                    | 0.39                       | 0.68                          | -0.44                      | -0.65                  |
| $\text{NH}_2 + (\text{NH}_2)_2\text{SiH}_2 \longrightarrow (\text{NH}_2)_2\text{SiH} + \text{NH}_3$                         | 0.0                    | 0.26                       | 0.66                          | -0.33                      | -0.56                  |
| $\text{NH}_2 + (\text{NH}_2)_3\text{SiH} \longrightarrow (\text{NH}_2)_3\text{Si} + \text{NH}_3$                            | 0.0                    | 0.34                       | 0.63                          | -0.14                      | -0.44                  |
| $\text{SiH}_4 + \text{H} \longrightarrow \text{SiH}_3 + \text{H}_2$                                                         | 0.0                    | 0.30                       | 0.55                          | -0.22                      | -0.35                  |
| $\text{NH}_2\text{SiH}_3 + \text{H} \longrightarrow \text{NH}_2\text{SiH}_2 + \text{H}_2$                                   | 0.0                    | 0.34                       | 0.49                          | -0.17                      | -0.32                  |
| $(\text{NH}_2)_2\text{SiH}_2 + \text{H} \longrightarrow (\text{NH}_2)_2\text{SiH} + \text{H}_2$                             | 0.0                    | 0.34                       | 0.57                          | -0.09                      | -0.27                  |
| $(\text{NH}_2)_3\text{SiH} + \text{H} \longrightarrow (\text{NH}_2)_3\text{Si} + \text{H}_2$                                | 0.0                    | 0.35                       | 0.56                          | 0.03                       | -0.15                  |

Table 11: Relative Gibbs free energies of reactants ( $\Delta G_r$ ), pre-reaction complexes( $\Delta G_{pk1}$ ), transition states ( $\Delta G^\ddagger$ ), post-reaction complexes ( $\Delta G_{pk2}$ ) and products ( $\Delta G_p$ ) for reactions in silane-ammonia plasma at 250 K and 100 Pa. All Gibbs free energies are calculated with MP2/aug-cc-pVTZ//CASPT2/aug-cc-pVTZ method and vibrational contribution to entropy is calculated with MP2/aug-cc-pVTZ. Entropy of hydrogen molecule is taken from NIST-JANAF thermochemical tables.<sup>1</sup> Relative Gibbs free energies are shown relative to reactants.

| reaction                                                                                                                | $\Delta G_r/\text{eV}$ | $\Delta G_{pk1}/\text{eV}$ | $\Delta G^\ddagger/\text{eV}$ | $\Delta G_{pk2}/\text{eV}$ | $\Delta G_p/\text{eV}$ |
|-------------------------------------------------------------------------------------------------------------------------|------------------------|----------------------------|-------------------------------|----------------------------|------------------------|
| $\text{NH}_3 + \text{SiH}_4 \rightarrow \text{SiH}_3\text{NH}_2 + \text{H}_2$                                           | 0.0                    | 0.25                       | 2.23                          | -0.15                      | -0.30                  |
| $\text{NH}_3 + \text{SiH}_3\text{NH}_2 \rightarrow \text{SiH}_2(\text{NH}_2)_2 + \text{H}_2$                            | 0.0                    | 0.27                       | 1.92                          | -0.31                      | -0.45                  |
| $\text{NH}_3 + \text{SiH}_2(\text{NH}_2)_2 \rightarrow \text{SiH}(\text{NH}_2)_3 + \text{H}_2$                          | 0.0                    | 0.21                       | 2.22                          | -0.40                      | -0.52                  |
| $\text{NH}_3 + \text{SiH}(\text{NH}_2)_3 \rightarrow \text{Si}(\text{NH}_2)_4 + \text{H}_2$                             | 0.0                    | 0.28                       | 2.22                          | -0.38                      | -0.54                  |
| $\text{SiH}_4 + \text{NH}_2\text{SiH}_3 \rightarrow (\text{SiH}_3)_2\text{NH} + \text{H}_2$                             | 0.0                    | 0.26                       | 2.21                          | -0.29                      | -0.44                  |
| $\text{SiH}_4 + (\text{SiH}_3)_2\text{NH} \rightarrow (\text{SiH}_3)_3\text{N} + \text{H}_2$                            | 0.0                    | 0.31                       | 2.25                          | -0.30                      | -0.41                  |
| $\text{SiH}_3\text{NH}_2 + (\text{NH}_2)_3\text{SiH} \rightarrow \text{SiH}_3\text{-NH-Si}(\text{NH}_2)_3 + \text{H}_2$ | 0.0                    | 0.26                       | 2.30                          | -0.43                      | -0.57                  |
| $\text{SiH}_3\text{NH}_2 \rightarrow \text{SiHNH}_2 + \text{H}_2$                                                       | 0.0                    | -                          | 2.59                          | 1.48                       | 1.33                   |
| $\text{SiH}_2(\text{NH}_2)_2 \rightarrow \text{Si}(\text{NH}_2)_2 + \text{H}_2$                                         | 0.0                    | -                          | 3.02                          | 1.09                       | 0.96                   |
| $\text{NH}_2 + \text{SiH}_3 \rightarrow \text{SiH}_3\text{NH}_2$                                                        | 0.0                    | -                          | -                             | -                          | -4.05                  |
| $\text{NH}_2 + \text{SiH}_2\text{NH}_2 \rightarrow \text{SiH}_2(\text{NH}_2)_2$                                         | 0.0                    | -                          | -                             | -                          | -4.31                  |
| $\text{NH}_2 + \text{SiH}(\text{NH}_2)_2 \rightarrow \text{SiH}(\text{NH}_2)_3$                                         | 0.0                    | -                          | -                             | -                          | -4.46                  |
| $\text{NH}_2 + \text{Si}(\text{NH}_2)_3 \rightarrow \text{Si}(\text{NH}_2)_4$                                           | 0.0                    | -                          | -                             | -                          | -4.53                  |
| $\text{SiH}_3 + \text{SiH}_3\text{NH} \rightarrow (\text{SiH}_3)_2\text{NH}$                                            | 0.0                    | -                          | -                             | -                          | -4.37                  |
| $\text{SiH}_3 + (\text{SiH}_3)_2\text{N} \rightarrow (\text{SiH}_3)_3\text{N}$                                          | 0.0                    | -                          | -                             | -                          | -5.04                  |
| $\text{SiH}_3 + \text{NH}_3 \rightarrow \text{SiH}_3\text{NH}_3$                                                        | 0.0                    | 0.28                       | 0.48                          | -                          | 0.96                   |
| $\text{NH}_2\text{SiH}_2 + \text{NH}_3 \rightarrow \text{NH}_2\text{SiH}_2\text{NH}_3$                                  | 0.0                    | 0.30                       | 0.96                          | -                          | 0.83                   |
| $(\text{NH}_2)_2\text{SiH} + \text{NH}_3 \rightarrow (\text{NH}_2)_2\text{SiHNH}_3$                                     | 0.0                    | 0.20                       | 0.97                          | -                          | 0.68                   |
| $\text{NH}_3\text{SiH}_3 \rightarrow \text{NH}_2\text{SiH}_3 + \text{H}$                                                | 0.0                    | -                          | 0.27                          | -0.38                      | -0.72                  |
| $\text{NH}_2\text{SiH}_2\text{NH}_3 \rightarrow (\text{NH}_2)_2\text{SiH}_2 + \text{H}$                                 | 0.0                    | -                          | 0.20                          | -0.55                      | -0.86                  |
| $(\text{NH}_2)_2\text{SiHNH}_3 \rightarrow (\text{NH}_2)_3\text{SiH} + \text{H}$                                        | 0.0                    | -                          | 0.12                          | -0.57                      | -0.92                  |
| $(\text{NH}_2)_3\text{SiNH}_3 \rightarrow (\text{NH}_2)_4\text{Si} + \text{H}$                                          | 0.0                    | -                          | 0.14                          | -0.52                      | -0.78                  |
| $\text{SiH}_2 + \text{NH}_3 \rightarrow \text{SiH}_2\text{-NH}_3$                                                       | 0.0                    | -                          | -                             | -                          | -0.69                  |
| $\text{SiH}_2 + \text{NH}_2\text{SiH}_3 \rightarrow \text{SiH}_2\text{-NH}_2\text{SiH}_3$                               | 0.0                    | -                          | -                             | -                          | -0.59                  |
| $\text{SiH}_2 + \text{NH}(\text{SiH}_3)_2 \rightarrow \text{SiH}_2\text{-NH}(\text{SiH}_3)_2$                           | 0.0                    | -                          | -                             | -                          | -0.48                  |
| $\text{SiH}_2\text{-NH}_3 + \text{NH}_3 \rightarrow \text{NH}_3\text{-SiH}_2\text{-NH}_3$                               | 0.0                    | 0.32                       | -                             | -                          | 0.30                   |
| $\text{SiH}_2\text{-NH}_3 \rightarrow \text{SiH}_3\text{NH}_2$                                                          | 0.0                    | -                          | 1.44                          | -                          | -1.74                  |
| $\text{SiH}_2\text{-NH}_2\text{SiH}_3 \rightarrow \text{NH}(\text{SiH}_3)_2$                                            | 0.0                    | -                          | 1.23                          | -                          | -1.94                  |
| $\text{SiH}_2\text{-NH}(\text{SiH}_3)_2 \rightarrow \text{N}(\text{SiH}_3)_3$                                           | 0.0                    | -                          | 1.04                          | -                          | -2.04                  |
| $\text{NH}_2 + \text{SiH}_4 \rightarrow \text{NH}_2\text{SiH}_3 + \text{H}$                                             | 0.0                    | 0.27                       | 0.70                          | -0.20                      | -0.50                  |
| $\text{NH}_2 + \text{NH}_2\text{SiH}_3 \rightarrow (\text{NH}_2)_2\text{SiH}_2 + \text{H}$                              | 0.0                    | 0.21                       | 0.51                          | -0.37                      | -0.66                  |
| $\text{NH}_2 + (\text{NH}_2)_2\text{SiH}_2 \rightarrow (\text{NH}_2)_3\text{SiH} + \text{H}$                            | 0.0                    | 0.20                       | 0.43                          | -0.48                      | -0.85                  |
| $\text{NH}_2 + (\text{NH}_2)_3\text{SiH} \rightarrow (\text{NH}_2)_4\text{Si} + \text{H}$                               | 0.0                    | 0.32                       | 0.57                          | -0.50                      | -0.80                  |
| $\text{SiH}_3 + \text{SiH}_4 \rightarrow \text{SiH}_4 + \text{SiH}_3$                                                   | 0.0                    | 0.37                       | 0.67                          | 0.37                       | 0.01                   |
| $\text{SiH}_3 + \text{NH}_2\text{SiH}_3 \rightarrow \text{NH}_2\text{SiH}_2 + \text{SiH}_4$                             | 0.0                    | 0.28                       | 0.70                          | 0.26                       | 0.03                   |
| $\text{SiH}_3 + (\text{NH}_2)_2\text{SiH}_2 \rightarrow (\text{NH}_2)_2\text{SiH} + \text{SiH}_4$                       | 0.0                    | 0.27                       | 0.73                          | 0.35                       | 0.07                   |
| $\text{SiH}_3 + (\text{NH}_2)_3\text{SiH} \rightarrow (\text{NH}_2)_3\text{Si} + \text{SiH}_4$                          | 0.0                    | 0.31                       | 0.92                          | 0.53                       | 0.19                   |
| $\text{NH}_2 + \text{SiH}_4 \rightarrow \text{SiH}_3 + \text{NH}_3$                                                     | 0.0                    | 0.26                       | 0.61                          | -0.39                      | -0.65                  |
| $\text{NH}_2 + \text{NH}_2\text{SiH}_3 \rightarrow \text{NH}_2\text{SiH}_2 + \text{NH}_3$                               | 0.0                    | 0.37                       | 0.67                          | -0.45                      | -0.65                  |
| $\text{NH}_2 + (\text{NH}_2)_2\text{SiH}_2 \rightarrow (\text{NH}_2)_2\text{SiH} + \text{NH}_3$                         | 0.0                    | 0.25                       | 0.65                          | -0.35                      | -0.56                  |
| $\text{NH}_2 + (\text{NH}_2)_3\text{SiH} \rightarrow (\text{NH}_2)_3\text{Si} + \text{NH}_3$                            | 0.0                    | 0.32                       | 0.61                          | -0.15                      | -0.44                  |
| $\text{SiH}_4 + \text{H} \rightarrow \text{SiH}_3 + \text{H}_2$                                                         | 0.0                    | 0.28                       | 0.53                          | -0.23                      | -0.37                  |
| $\text{NH}_2\text{SiH}_3 + \text{H} \rightarrow \text{NH}_2\text{SiH}_2 + \text{H}_2$                                   | 0.0                    | 0.33                       | 0.47                          | -0.18                      | -0.33                  |
| $(\text{NH}_2)_2\text{SiH}_2 + \text{H} \rightarrow (\text{NH}_2)_2\text{SiH} + \text{H}_2$                             | 0.0                    | 0.32                       | 0.56                          | -0.10                      | -0.28                  |
| $(\text{NH}_2)_3\text{SiH} + \text{H} \rightarrow (\text{NH}_2)_3\text{Si} + \text{H}_2$                                | 0.0                    | 0.33                       | 0.54                          | 0.02                       | -0.16                  |

Table 12: Relative Gibbs free energies of reactants ( $\Delta G_r$ ), pre-reaction complexes( $\Delta G_{pk1}$ ), transition states ( $\Delta G^\ddagger$ ), post-reaction complexes ( $\Delta G_{pk2}$ ) and products ( $\Delta G_p$ ) for reactions in silane-ammonia plasma at 250 K and 200 Pa. All Gibbs free energies are calculated with MP2/aug-cc-pVTZ//CASPT2/aug-cc-pVTZ method and vibrational contribution to entropy is calculated with MP2/aug-cc-pVTZ. Entropy of hydrogen molecule is taken from NIST-JANAF thermochemical tables.<sup>1</sup> Relative Gibbs free energies are shown relative to reactants.

| reaction                                                                                                                    | $\Delta G_r/\text{eV}$ | $\Delta G_{pk1}/\text{eV}$ | $\Delta G^\ddagger/\text{eV}$ | $\Delta G_{pk2}/\text{eV}$ | $\Delta G_p/\text{eV}$ |
|-----------------------------------------------------------------------------------------------------------------------------|------------------------|----------------------------|-------------------------------|----------------------------|------------------------|
| $\text{NH}_3 + \text{SiH}_4 \longrightarrow \text{SiH}_3\text{NH}_2 + \text{H}_2$                                           | 0.0                    | 0.23                       | 2.22                          | -0.16                      | -0.31                  |
| $\text{NH}_3 + \text{SiH}_3\text{NH}_2 \longrightarrow \text{SiH}_2(\text{NH}_2)_2 + \text{H}_2$                            | 0.0                    | 0.26                       | 1.91                          | -0.33                      | -0.47                  |
| $\text{NH}_3 + \text{SiH}_2(\text{NH}_2)_2 \longrightarrow \text{SiH}(\text{NH}_2)_3 + \text{H}_2$                          | 0.0                    | 0.19                       | 2.20                          | -0.42                      | -0.53                  |
| $\text{NH}_3 + \text{SiH}(\text{NH}_2)_3 \longrightarrow \text{Si}(\text{NH}_2)_4 + \text{H}_2$                             | 0.0                    | 0.27                       | 2.20                          | -0.39                      | -0.56                  |
| $\text{SiH}_4 + \text{NH}_2\text{SiH}_3 \longrightarrow (\text{SiH}_3)_2\text{NH} + \text{H}_2$                             | 0.0                    | 0.25                       | 2.20                          | -0.31                      | -0.46                  |
| $\text{SiH}_4 + (\text{SiH}_3)_2\text{NH} \longrightarrow (\text{SiH}_3)_3\text{N} + \text{H}_2$                            | 0.0                    | 0.29                       | 2.23                          | -0.31                      | -0.42                  |
| $\text{SiH}_3\text{NH}_2 + (\text{NH}_2)_3\text{SiH} \longrightarrow \text{SiH}_3\text{-NH-Si}(\text{NH}_2)_3 + \text{H}_2$ | 0.0                    | 0.25                       | 2.28                          | -0.45                      | -0.59                  |
| $\text{SiH}_3\text{NH}_2 \longrightarrow \text{SiHNH}_2 + \text{H}_2$                                                       | 0.0                    | -                          | 2.59                          | 1.48                       | 1.33                   |
| $\text{SiH}_2(\text{NH}_2)_2 \longrightarrow \text{Si}(\text{NH}_2)_2 + \text{H}_2$                                         | 0.0                    | -                          | 3.02                          | 1.09                       | 0.96                   |
| $\text{NH}_2^\cdot + \text{SiH}_3^\cdot \longrightarrow \text{SiH}_3\text{NH}_2$                                            | 0.0                    | -                          | -                             | -                          | -4.07                  |
| $\text{NH}_2^\cdot + \text{SiH}_2\text{NH}_2^\cdot \longrightarrow \text{SiH}_2(\text{NH}_2)_2$                             | 0.0                    | -                          | -                             | -                          | -4.32                  |
| $\text{NH}_2^\cdot + \text{SiH}(\text{NH}_2)_2^\cdot \longrightarrow \text{SiH}(\text{NH}_2)_3$                             | 0.0                    | -                          | -                             | -                          | -4.47                  |
| $\text{NH}_2^\cdot + \text{Si}(\text{NH}_2)_3^\cdot \longrightarrow \text{Si}(\text{NH}_2)_4$                               | 0.0                    | -                          | -                             | -                          | -4.55                  |
| $\text{SiH}_3^\cdot + \text{SiH}_3\text{NH}^\cdot \longrightarrow (\text{SiH}_3)_2\text{NH}$                                | 0.0                    | -                          | -                             | -                          | -4.39                  |
| $\text{SiH}_3^\cdot + (\text{SiH}_3)_2\text{N}^\cdot \longrightarrow (\text{SiH}_3)_3\text{N}$                              | 0.0                    | -                          | -                             | -                          | -5.06                  |
| $\text{SiH}_3^\cdot + \text{NH}_3 \longrightarrow \text{SiH}_3\text{NH}_3^\cdot$                                            | 0.0                    | 0.27                       | 0.46                          | -                          | 0.94                   |
| $\text{NH}_2\text{SiH}_2^\cdot + \text{NH}_3 \longrightarrow \text{NH}_2\text{SiH}_2\text{NH}_3^\cdot$                      | 0.0                    | 0.28                       | 0.94                          | -                          | 0.81                   |
| $(\text{NH}_2)_2\text{SiH}^\cdot + \text{NH}_3 \longrightarrow (\text{NH}_2)_2\text{SiHNH}_3^\cdot$                         | 0.0                    | 0.19                       | 0.96                          | -                          | 0.67                   |
| $\text{NH}_3\text{SiH}_3^\cdot \longrightarrow \text{NH}_2\text{SiH}_3 + \text{H}^\cdot$                                    | 0.0                    | -                          | 0.27                          | -0.38                      | -0.70                  |
| $\text{NH}_2\text{SiH}_2\text{NH}_3^\cdot \longrightarrow (\text{NH}_2)_2\text{SiH}_2 + \text{H}^\cdot$                     | 0.0                    | -                          | 0.20                          | -0.55                      | -0.85                  |
| $(\text{NH}_2)_2\text{SiHNH}_3^\cdot \longrightarrow (\text{NH}_2)_3\text{SiH} + \text{H}^\cdot$                            | 0.0                    | -                          | 0.12                          | -0.57                      | -0.90                  |
| $(\text{NH}_2)_3\text{SiNH}_3^\cdot \longrightarrow (\text{NH}_2)_4\text{Si} + \text{H}^\cdot$                              | 0.0                    | -                          | 0.14                          | -0.52                      | -0.77                  |
| $\text{SiH}_2 + \text{NH}_3 \longrightarrow \text{SiH}_2\text{-NH}_3$                                                       | 0.0                    | -                          | -                             | -                          | -0.71                  |
| $\text{SiH}_2 + \text{NH}_2\text{SiH}_3 \longrightarrow \text{SiH}_2\text{-NH}_2\text{SiH}_3$                               | 0.0                    | -                          | -                             | -                          | -0.60                  |
| $\text{SiH}_2 + \text{NH}(\text{SiH}_3)_2 \longrightarrow \text{SiH}_2\text{-NH}(\text{SiH}_3)_2$                           | 0.0                    | -                          | -                             | -                          | -0.50                  |
| $\text{SiH}_2\text{-NH}_3 + \text{NH}_3 \longrightarrow \text{NH}_3\text{-SiH}_2\text{-NH}_3$                               | 0.0                    | 0.31                       | -                             | -                          | 0.28                   |
| $\text{SiH}_2\text{-NH}_3 \longrightarrow \text{SiH}_3\text{NH}_2$                                                          | 0.0                    | -                          | 1.44                          | -                          | -1.74                  |
| $\text{SiH}_2\text{-NH}_2\text{SiH}_3 \longrightarrow \text{NH}(\text{SiH}_3)_2$                                            | 0.0                    | -                          | 1.23                          | -                          | -1.94                  |
| $\text{SiH}_2\text{-NH}(\text{SiH}_3)_2 \longrightarrow \text{N}(\text{SiH}_3)_3$                                           | 0.0                    | -                          | 1.04                          | -                          | -2.04                  |
| $\text{NH}_2^\cdot + \text{SiH}_4 \longrightarrow \text{NH}_2\text{SiH}_3 + \text{H}^\cdot$                                 | 0.0                    | 0.25                       | 0.68                          | -0.22                      | -0.50                  |
| $\text{NH}_2^\cdot + \text{NH}_2\text{SiH}_3 \longrightarrow (\text{NH}_2)_2\text{SiH}_2 + \text{H}^\cdot$                  | 0.0                    | 0.20                       | 0.49                          | -0.38                      | -0.66                  |
| $\text{NH}_2^\cdot + (\text{NH}_2)_2\text{SiH}_2 \longrightarrow (\text{NH}_2)_3\text{SiH} + \text{H}^\cdot$                | 0.0                    | 0.18                       | 0.42                          | -0.49                      | -0.85                  |
| $\text{NH}_2^\cdot + (\text{NH}_2)_3\text{SiH} \longrightarrow (\text{NH}_2)_4\text{Si} + \text{H}^\cdot$                   | 0.0                    | 0.31                       | 0.56                          | -0.52                      | -0.80                  |
| $\text{SiH}_3^\cdot + \text{SiH}_4 \longrightarrow \text{SiH}_4 + \text{SiH}_3^\cdot$                                       | 0.0                    | 0.36                       | 0.66                          | 0.36                       | 0.01                   |
| $\text{SiH}_3^\cdot + \text{NH}_2\text{SiH}_3 \longrightarrow \text{NH}_2\text{SiH}_2^\cdot + \text{SiH}_4$                 | 0.0                    | 0.26                       | 0.69                          | 0.25                       | 0.03                   |
| $\text{SiH}_3^\cdot + (\text{NH}_2)_2\text{SiH}_2 \longrightarrow (\text{NH}_2)_2\text{SiH}^\cdot + \text{SiH}_4$           | 0.0                    | 0.25                       | 0.72                          | 0.34                       | 0.07                   |
| $\text{SiH}_3^\cdot + (\text{NH}_2)_3\text{SiH} \longrightarrow (\text{NH}_2)_3\text{Si}^\cdot + \text{SiH}_4$              | 0.0                    | 0.29                       | 0.90                          | 0.52                       | 0.19                   |
| $\text{NH}_2^\cdot + \text{SiH}_4 \longrightarrow \text{SiH}_3^\cdot + \text{NH}_3$                                         | 0.0                    | 0.24                       | 0.59                          | -0.41                      | -0.65                  |
| $\text{NH}_2^\cdot + \text{NH}_2\text{SiH}_3 \longrightarrow \text{NH}_2\text{SiH}_2^\cdot + \text{NH}_3$                   | 0.0                    | 0.36                       | 0.65                          | -0.47                      | -0.65                  |
| $\text{NH}_2^\cdot + (\text{NH}_2)_2\text{SiH}_2 \longrightarrow (\text{NH}_2)_2\text{SiH}^\cdot + \text{NH}_3$             | 0.0                    | 0.23                       | 0.63                          | -0.36                      | -0.56                  |
| $\text{NH}_2^\cdot + (\text{NH}_2)_3\text{SiH} \longrightarrow (\text{NH}_2)_3\text{Si}^\cdot + \text{NH}_3$                | 0.0                    | 0.31                       | 0.60                          | -0.17                      | -0.44                  |
| $\text{SiH}_4 + \text{H}^\cdot \longrightarrow \text{SiH}_3^\cdot + \text{H}_2$                                             | 0.0                    | 0.27                       | 0.52                          | -0.25                      | -0.38                  |
| $\text{NH}_2\text{SiH}_3 + \text{H}^\cdot \longrightarrow \text{NH}_2\text{SiH}_2^\cdot + \text{H}_2$                       | 0.0                    | 0.31                       | 0.46                          | -0.20                      | -0.35                  |
| $(\text{NH}_2)_2\text{SiH}_2 + \text{H}^\cdot \longrightarrow (\text{NH}_2)_2\text{SiH}^\cdot + \text{H}_2$                 | 0.0                    | 0.31                       | 0.54                          | -0.12                      | -0.30                  |
| $(\text{NH}_2)_3\text{SiH} + \text{H}^\cdot \longrightarrow (\text{NH}_2)_3\text{Si}^\cdot + \text{H}_2$                    | 0.0                    | 0.32                       | 0.53                          | 0.00                       | -0.18                  |

Table 13: Relative Gibbs free energies of reactants ( $\Delta G_r$ ), pre-reaction complexes( $\Delta G_{pk1}$ ), transition states ( $\Delta G^\ddagger$ ), post-reaction complexes ( $\Delta G_{pk2}$ ) and products ( $\Delta G_p$ ) for reactions in silane-ammonia plasma at 250 K and 300 Pa. All Gibbs free energies are calculated with MP2/aug-cc-pVTZ//CASPT2/aug-cc-pVTZ method and vibrational contribution to entropy is calculated with MP2/aug-cc-pVTZ. Entropy of hydrogen molecule is taken from NIST-JANAF thermochemical tables.<sup>1</sup> Relative Gibbs free energies are shown relative to reactants.

| reaction                                                                                                                | $\Delta G_r/\text{eV}$ | $\Delta G_{pk1}/\text{eV}$ | $\Delta G^\ddagger/\text{eV}$ | $\Delta G_{pk2}/\text{eV}$ | $\Delta G_p/\text{eV}$ |
|-------------------------------------------------------------------------------------------------------------------------|------------------------|----------------------------|-------------------------------|----------------------------|------------------------|
| $\text{NH}_3 + \text{SiH}_4 \rightarrow \text{SiH}_3\text{NH}_2 + \text{H}_2$                                           | 0.0                    | 0.23                       | 2.21                          | -0.17                      | -0.32                  |
| $\text{NH}_3 + \text{SiH}_3\text{NH}_2 \rightarrow \text{SiH}_2(\text{NH}_2)_2 + \text{H}_2$                            | 0.0                    | 0.25                       | 1.90                          | -0.34                      | -0.48                  |
| $\text{NH}_3 + \text{SiH}_2(\text{NH}_2)_2 \rightarrow \text{SiH}(\text{NH}_2)_3 + \text{H}_2$                          | 0.0                    | 0.18                       | 2.19                          | -0.43                      | -0.54                  |
| $\text{NH}_3 + \text{SiH}(\text{NH}_2)_3 \rightarrow \text{Si}(\text{NH}_2)_4 + \text{H}_2$                             | 0.0                    | 0.26                       | 2.20                          | -0.40                      | -0.56                  |
| $\text{SiH}_4 + \text{NH}_2\text{SiH}_3 \rightarrow (\text{SiH}_3)_2\text{NH} + \text{H}_2$                             | 0.0                    | 0.24                       | 2.19                          | -0.31                      | -0.47                  |
| $\text{SiH}_4 + (\text{SiH}_3)_2\text{NH} \rightarrow (\text{SiH}_3)_3\text{N} + \text{H}_2$                            | 0.0                    | 0.28                       | 2.23                          | -0.32                      | -0.43                  |
| $\text{SiH}_3\text{NH}_2 + (\text{NH}_2)_3\text{SiH} \rightarrow \text{SiH}_3\text{-NH-Si}(\text{NH}_2)_3 + \text{H}_2$ | 0.0                    | 0.24                       | 2.27                          | -0.46                      | -0.60                  |
| $\text{SiH}_3\text{NH}_2 \rightarrow \text{SiHNH}_2 + \text{H}_2$                                                       | 0.0                    | -                          | 2.59                          | 1.48                       | 1.33                   |
| $\text{SiH}_2(\text{NH}_2)_2 \rightarrow \text{Si}(\text{NH}_2)_2 + \text{H}_2$                                         | 0.0                    | -                          | 3.02                          | 1.09                       | 0.96                   |
| $\text{NH}_2 + \text{SiH}_3 \rightarrow \text{SiH}_3\text{NH}_2$                                                        | 0.0                    | -                          | -                             | -                          | -4.20                  |
| $\text{NH}_2 + \text{SiH}_2\text{NH}_2 \rightarrow \text{SiH}_2(\text{NH}_2)_2$                                         | 0.0                    | -                          | -                             | -                          | -4.45                  |
| $\text{NH}_2 + \text{SiH}(\text{NH}_2)_2 \rightarrow \text{SiH}(\text{NH}_2)_3$                                         | 0.0                    | -                          | -                             | -                          | -4.61                  |
| $\text{NH}_2 + \text{Si}(\text{NH}_2)_3 \rightarrow \text{Si}(\text{NH}_2)_4$                                           | 0.0                    | -                          | -                             | -                          | -4.68                  |
| $\text{SiH}_3 + \text{SiH}_3\text{NH} \rightarrow (\text{SiH}_3)_2\text{NH}$                                            | 0.0                    | -                          | -                             | -                          | -4.40                  |
| $\text{SiH}_3 + (\text{SiH}_3)_2\text{N} \rightarrow (\text{SiH}_3)_3\text{N}$                                          | 0.0                    | -                          | -                             | -                          | -5.07                  |
| $\text{SiH}_3 + \text{NH}_3 \rightarrow \text{SiH}_3\text{NH}_3$                                                        | 0.0                    | 0.26                       | 0.45                          | -                          | 0.93                   |
| $\text{NH}_2\text{SiH}_2 + \text{NH}_3 \rightarrow \text{NH}_2\text{SiH}_2\text{NH}_3$                                  | 0.0                    | 0.28                       | 0.93                          | -                          | 0.81                   |
| $(\text{NH}_2)_2\text{SiH} + \text{NH}_3 \rightarrow (\text{NH}_2)_2\text{SiHNH}_3$                                     | 0.0                    | 0.18                       | 0.95                          | -                          | 0.66                   |
| $\text{NH}_3\text{SiH}_3 \rightarrow \text{NH}_2\text{SiH}_3 + \text{H}$                                                | 0.0                    | -                          | 0.27                          | -0.38                      | -0.69                  |
| $\text{NH}_2\text{SiH}_2\text{NH}_3 \rightarrow (\text{NH}_2)_2\text{SiH}_2 + \text{H}$                                 | 0.0                    | -                          | 0.20                          | -0.55                      | -0.84                  |
| $(\text{NH}_2)_2\text{SiHNH}_3 \rightarrow (\text{NH}_2)_3\text{SiH} + \text{H}$                                        | 0.0                    | -                          | 0.12                          | -0.57                      | -0.89                  |
| $(\text{NH}_2)_3\text{SiNH}_3 \rightarrow (\text{NH}_2)_4\text{Si} + \text{H}$                                          | 0.0                    | -                          | 0.14                          | -0.52                      | -0.76                  |
| $\text{SiH}_2 + \text{NH}_3 \rightarrow \text{SiH}_2\text{-NH}_3$                                                       | 0.0                    | -                          | -                             | -                          | -0.71                  |
| $\text{SiH}_2 + \text{NH}_2\text{SiH}_3 \rightarrow \text{SiH}_2\text{-NH}_2\text{SiH}_3$                               | 0.0                    | -                          | -                             | -                          | -0.61                  |
| $\text{SiH}_2 + \text{NH}(\text{SiH}_3)_2 \rightarrow \text{SiH}_2\text{-NH}(\text{SiH}_3)_2$                           | 0.0                    | -                          | -                             | -                          | -0.50                  |
| $\text{SiH}_2\text{-NH}_3 + \text{NH}_3 \rightarrow \text{NH}_3\text{-SiH}_2\text{-NH}_3$                               | 0.0                    | 0.30                       | -                             | -                          | 0.27                   |
| $\text{SiH}_2\text{-NH}_3 \rightarrow \text{SiH}_3\text{NH}_2$                                                          | 0.0                    | -                          | 1.44                          | -                          | -1.74                  |
| $\text{SiH}_2\text{-NH}_2\text{SiH}_3 \rightarrow \text{NH}(\text{SiH}_3)_2$                                            | 0.0                    | -                          | 1.23                          | -                          | -1.94                  |
| $\text{SiH}_2\text{-NH}(\text{SiH}_3)_2 \rightarrow \text{N}(\text{SiH}_3)_3$                                           | 0.0                    | -                          | 1.04                          | -                          | -2.04                  |
| $\text{NH}_2 + \text{SiH}_4 \rightarrow \text{NH}_2\text{SiH}_3 + \text{H}$                                             | 0.0                    | 0.12                       | 0.55                          | -0.35                      | -0.62                  |
| $\text{NH}_2 + \text{NH}_2\text{SiH}_3 \rightarrow (\text{NH}_2)_2\text{SiH}_2 + \text{H}$                              | 0.0                    | 0.06                       | 0.36                          | -0.51                      | -0.79                  |
| $\text{NH}_2 + (\text{NH}_2)_2\text{SiH}_2 \rightarrow (\text{NH}_2)_3\text{SiH} + \text{H}$                            | 0.0                    | 0.05                       | 0.29                          | -0.62                      | -0.97                  |
| $\text{NH}_2 + (\text{NH}_2)_3\text{SiH} \rightarrow (\text{NH}_2)_4\text{Si} + \text{H}$                               | 0.0                    | 0.18                       | 0.42                          | -0.65                      | -0.92                  |
| $\text{SiH}_3 + \text{SiH}_4 \rightarrow \text{SiH}_4 + \text{SiH}_3$                                                   | 0.0                    | 0.35                       | 0.65                          | 0.35                       | 0.01                   |
| $\text{SiH}_3 + \text{NH}_2\text{SiH}_3 \rightarrow \text{NH}_2\text{SiH}_2 + \text{SiH}_4$                             | 0.0                    | 0.25                       | 0.68                          | 0.24                       | 0.03                   |
| $\text{SiH}_3 + (\text{NH}_2)_2\text{SiH}_2 \rightarrow (\text{NH}_2)_2\text{SiH} + \text{SiH}_4$                       | 0.0                    | 0.25                       | 0.71                          | 0.33                       | 0.07                   |
| $\text{SiH}_3 + (\text{NH}_2)_3\text{SiH} \rightarrow (\text{NH}_2)_3\text{Si} + \text{SiH}_4$                          | 0.0                    | 0.28                       | 0.90                          | 0.51                       | 0.19                   |
| $\text{NH}_2 + \text{SiH}_4 \rightarrow \text{SiH}_3 + \text{NH}_3$                                                     | 0.0                    | 0.11                       | 0.46                          | -0.54                      | -0.78                  |
| $\text{NH}_2 + \text{NH}_2\text{SiH}_3 \rightarrow \text{NH}_2\text{SiH}_2 + \text{NH}_3$                               | 0.0                    | 0.23                       | 0.52                          | -0.60                      | -0.77                  |
| $\text{NH}_2 + (\text{NH}_2)_2\text{SiH}_2 \rightarrow (\text{NH}_2)_2\text{SiH} + \text{NH}_3$                         | 0.0                    | 0.10                       | 0.50                          | -0.49                      | -0.68                  |
| $\text{NH}_2 + (\text{NH}_2)_3\text{SiH} \rightarrow (\text{NH}_2)_3\text{Si} + \text{NH}_3$                            | 0.0                    | 0.18                       | 0.46                          | -0.30                      | -0.57                  |
| $\text{SiH}_4 + \text{H} \rightarrow \text{SiH}_3 + \text{H}_2$                                                         | 0.0                    | 0.26                       | 0.51                          | -0.25                      | -0.39                  |
| $\text{NH}_2\text{SiH}_3 + \text{H} \rightarrow \text{NH}_2\text{SiH}_2 + \text{H}_2$                                   | 0.0                    | 0.31                       | 0.45                          | -0.21                      | -0.36                  |
| $(\text{NH}_2)_2\text{SiH}_2 + \text{H} \rightarrow (\text{NH}_2)_2\text{SiH} + \text{H}_2$                             | 0.0                    | 0.30                       | 0.53                          | -0.13                      | -0.31                  |
| $(\text{NH}_2)_3\text{SiH} + \text{H} \rightarrow (\text{NH}_2)_3\text{Si} + \text{H}_2$                                | 0.0                    | 0.31                       | 0.52                          | -0.00                      | -0.18                  |

Table 14: Relative Gibbs free energies of reactants ( $\Delta G_r$ ), pre-reaction complexes( $\Delta G_{pk1}$ ), transition states ( $\Delta G^\ddagger$ ), post-reaction complexes ( $\Delta G_{pk2}$ ) and products ( $\Delta G_p$ ) for reactions in silane-ammonia plasma at 250 K and 400 Pa. All Gibbs free energies are calculated with MP2/aug-cc-pVTZ//CASPT2/aug-cc-pVTZ method and vibrational contribution to entropy is calculated with MP2/aug-cc-pVTZ. Entropy of hydrogen molecule is taken from NIST-JANAF thermochemical tables.<sup>1</sup> Relative Gibbs free energies are shown relative to reactants.

| reaction                                                                                                                    | $\Delta G_r/\text{eV}$ | $\Delta G_{pk1}/\text{eV}$ | $\Delta G^\ddagger/\text{eV}$ | $\Delta G_{pk2}/\text{eV}$ | $\Delta G_p/\text{eV}$ |
|-----------------------------------------------------------------------------------------------------------------------------|------------------------|----------------------------|-------------------------------|----------------------------|------------------------|
| $\text{NH}_3 + \text{SiH}_4 \longrightarrow \text{SiH}_3\text{NH}_2 + \text{H}_2$                                           | 0.0                    | 0.22                       | 2.20                          | -0.18                      | -0.33                  |
| $\text{NH}_3 + \text{SiH}_3\text{NH}_2 \longrightarrow \text{SiH}_2(\text{NH}_2)_2 + \text{H}_2$                            | 0.0                    | 0.24                       | 1.89                          | -0.34                      | -0.48                  |
| $\text{NH}_3 + \text{SiH}_2(\text{NH}_2)_2 \longrightarrow \text{SiH}(\text{NH}_2)_3 + \text{H}_2$                          | 0.0                    | 0.18                       | 2.19                          | -0.43                      | -0.55                  |
| $\text{NH}_3 + \text{SiH}(\text{NH}_2)_3 \longrightarrow \text{Si}(\text{NH}_2)_4 + \text{H}_2$                             | 0.0                    | 0.25                       | 2.19                          | -0.41                      | -0.57                  |
| $\text{SiH}_4 + \text{NH}_2\text{SiH}_3 \longrightarrow (\text{SiH}_3)_2\text{NH} + \text{H}_2$                             | 0.0                    | 0.23                       | 2.18                          | -0.32                      | -0.47                  |
| $\text{SiH}_4 + (\text{SiH}_3)_2\text{NH} \longrightarrow (\text{SiH}_3)_3\text{N} + \text{H}_2$                            | 0.0                    | 0.28                       | 2.22                          | -0.33                      | -0.44                  |
| $\text{SiH}_3\text{NH}_2 + (\text{NH}_2)_3\text{SiH} \longrightarrow \text{SiH}_3\text{-NH-Si}(\text{NH}_2)_3 + \text{H}_2$ | 0.0                    | 0.23                       | 2.27                          | -0.46                      | -0.60                  |
| $\text{SiH}_3\text{NH}_2 \longrightarrow \text{SiHNH}_2 + \text{H}_2$                                                       | 0.0                    | -                          | 2.59                          | 1.48                       | 1.33                   |
| $\text{SiH}_2(\text{NH}_2)_2 \longrightarrow \text{Si}(\text{NH}_2)_2 + \text{H}_2$                                         | 0.0                    | -                          | 3.02                          | 1.09                       | 0.96                   |
| $\text{NH}_2 + \text{SiH}_3 \longrightarrow \text{SiH}_3\text{NH}_2$                                                        | 0.0                    | -                          | -                             | -                          | -4.08                  |
| $\text{NH}_2 + \text{SiH}_2\text{NH}_2 \longrightarrow \text{SiH}_2(\text{NH}_2)_2$                                         | 0.0                    | -                          | -                             | -                          | -4.34                  |
| $\text{NH}_2 + \text{SiH}(\text{NH}_2)_2 \longrightarrow \text{SiH}(\text{NH}_2)_3$                                         | 0.0                    | -                          | -                             | -                          | -4.49                  |
| $\text{NH}_2 + \text{Si}(\text{NH}_2)_3 \longrightarrow \text{Si}(\text{NH}_2)_4$                                           | 0.0                    | -                          | -                             | -                          | -4.56                  |
| $\text{SiH}_3 + \text{SiH}_3\text{NH} \longrightarrow (\text{SiH}_3)_2\text{NH}$                                            | 0.0                    | -                          | -                             | -                          | -4.40                  |
| $\text{SiH}_3 + (\text{SiH}_3)_2\text{N} \longrightarrow (\text{SiH}_3)_3\text{N}$                                          | 0.0                    | -                          | -                             | -                          | -5.07                  |
| $\text{SiH}_3 + \text{NH}_3 \longrightarrow \text{SiH}_3\text{NH}_3$                                                        | 0.0                    | 0.25                       | 0.45                          | -                          | 0.93                   |
| $\text{NH}_2\text{SiH}_2 + \text{NH}_3 \longrightarrow \text{NH}_2\text{SiH}_2\text{NH}_3$                                  | 0.0                    | 0.27                       | 0.93                          | -                          | 0.80                   |
| $(\text{NH}_2)_2\text{SiH} + \text{NH}_3 \longrightarrow (\text{NH}_2)_2\text{SiHNH}_3$                                     | 0.0                    | 0.17                       | 0.94                          | -                          | 0.65                   |
| $\text{NH}_3\text{SiH}_3 \longrightarrow \text{NH}_2\text{SiH}_3 + \text{H}$                                                | 0.0                    | -                          | 0.27                          | -0.38                      | -0.69                  |
| $\text{NH}_2\text{SiH}_2\text{NH}_3 \longrightarrow (\text{NH}_2)_2\text{SiH}_2 + \text{H}$                                 | 0.0                    | -                          | 0.20                          | -0.55                      | -0.83                  |
| $(\text{NH}_2)_2\text{SiHNH}_3 \longrightarrow (\text{NH}_2)_3\text{SiH} + \text{H}$                                        | 0.0                    | -                          | 0.12                          | -0.57                      | -0.89                  |
| $(\text{NH}_2)_3\text{SiNH}_3 \longrightarrow (\text{NH}_2)_4\text{Si} + \text{H}$                                          | 0.0                    | -                          | 0.14                          | -0.52                      | -0.75                  |
| $\text{SiH}_2 + \text{NH}_3 \longrightarrow \text{SiH}_2\text{-NH}_3$                                                       | 0.0                    | -                          | -                             | -                          | -0.72                  |
| $\text{SiH}_2 + \text{NH}_2\text{SiH}_3 \longrightarrow \text{SiH}_2\text{-NH}_2\text{SiH}_3$                               | 0.0                    | -                          | -                             | -                          | -0.62                  |
| $\text{SiH}_2 + \text{NH}(\text{SiH}_3)_2 \longrightarrow \text{SiH}_2\text{-NH}(\text{SiH}_3)_2$                           | 0.0                    | -                          | -                             | -                          | -0.51                  |
| $\text{SiH}_2\text{-NH}_3 + \text{NH}_3 \longrightarrow \text{NH}_3\text{-SiH}_2\text{-NH}_3$                               | 0.0                    | 0.29                       | -                             | -                          | 0.27                   |
| $\text{SiH}_2\text{-NH}_3 \longrightarrow \text{SiH}_3\text{NH}_2$                                                          | 0.0                    | -                          | 1.44                          | -                          | -1.74                  |
| $\text{SiH}_2\text{-NH}_2\text{SiH}_3 \longrightarrow \text{NH}(\text{SiH}_3)_2$                                            | 0.0                    | -                          | 1.23                          | -                          | -1.94                  |
| $\text{SiH}_2\text{-NH}(\text{SiH}_3)_2 \longrightarrow \text{N}(\text{SiH}_3)_3$                                           | 0.0                    | -                          | 1.04                          | -                          | -2.04                  |
| $\text{NH}_2 + \text{SiH}_4 \longrightarrow \text{NH}_2\text{SiH}_3 + \text{H}$                                             | 0.0                    | 0.24                       | 0.67                          | -0.23                      | -0.50                  |
| $\text{NH}_2 + \text{NH}_2\text{SiH}_3 \longrightarrow (\text{NH}_2)_2\text{SiH}_2 + \text{H}$                              | 0.0                    | 0.18                       | 0.48                          | -0.39                      | -0.66                  |
| $\text{NH}_2 + (\text{NH}_2)_2\text{SiH}_2 \longrightarrow (\text{NH}_2)_3\text{SiH} + \text{H}$                            | 0.0                    | 0.17                       | 0.40                          | -0.51                      | -0.85                  |
| $\text{NH}_2 + (\text{NH}_2)_3\text{SiH} \longrightarrow (\text{NH}_2)_4\text{Si} + \text{H}$                               | 0.0                    | 0.29                       | 0.54                          | -0.53                      | -0.80                  |
| $\text{SiH}_3 + \text{SiH}_4 \longrightarrow \text{SiH}_4 + \text{SiH}_3$                                                   | 0.0                    | 0.34                       | 0.64                          | 0.34                       | 0.01                   |
| $\text{SiH}_3 + \text{NH}_2\text{SiH}_3 \longrightarrow \text{NH}_2\text{SiH}_2 + \text{SiH}_4$                             | 0.0                    | 0.25                       | 0.67                          | 0.23                       | 0.03                   |
| $\text{SiH}_3 + (\text{NH}_2)_2\text{SiH}_2 \longrightarrow (\text{NH}_2)_2\text{SiH} + \text{SiH}_4$                       | 0.0                    | 0.24                       | 0.70                          | 0.32                       | 0.07                   |
| $\text{SiH}_3 + (\text{NH}_2)_3\text{SiH} \longrightarrow (\text{NH}_2)_3\text{Si} + \text{SiH}_4$                          | 0.0                    | 0.28                       | 0.89                          | 0.50                       | 0.19                   |
| $\text{NH}_2 + \text{SiH}_4 \longrightarrow \text{SiH}_3 + \text{NH}_3$                                                     | 0.0                    | 0.23                       | 0.58                          | -0.42                      | -0.65                  |
| $\text{NH}_2 + \text{NH}_2\text{SiH}_3 \longrightarrow \text{NH}_2\text{SiH}_2 + \text{NH}_3$                               | 0.0                    | 0.34                       | 0.64                          | -0.48                      | -0.65                  |
| $\text{NH}_2 + (\text{NH}_2)_2\text{SiH}_2 \longrightarrow (\text{NH}_2)_2\text{SiH} + \text{NH}_3$                         | 0.0                    | 0.22                       | 0.62                          | -0.38                      | -0.56                  |
| $\text{NH}_2 + (\text{NH}_2)_3\text{SiH} \longrightarrow (\text{NH}_2)_3\text{Si} + \text{NH}_3$                            | 0.0                    | 0.29                       | 0.58                          | -0.18                      | -0.44                  |
| $\text{SiH}_4 + \text{H} \longrightarrow \text{SiH}_3 + \text{H}_2$                                                         | 0.0                    | 0.25                       | 0.50                          | -0.26                      | -0.40                  |
| $\text{NH}_2\text{SiH}_3 + \text{H} \longrightarrow \text{NH}_2\text{SiH}_2 + \text{H}_2$                                   | 0.0                    | 0.30                       | 0.44                          | -0.21                      | -0.36                  |
| $(\text{NH}_2)_2\text{SiH}_2 + \text{H} \longrightarrow (\text{NH}_2)_2\text{SiH} + \text{H}_2$                             | 0.0                    | 0.29                       | 0.53                          | -0.13                      | -0.31                  |
| $(\text{NH}_2)_3\text{SiH} + \text{H} \longrightarrow (\text{NH}_2)_3\text{Si} + \text{H}_2$                                | 0.0                    | 0.30                       | 0.51                          | -0.01                      | -0.19                  |

Table 15: Relative Gibbs free energies of reactants ( $\Delta G_r$ ), pre-reaction complexes( $\Delta G_{pk1}$ ), transition states ( $\Delta G^\ddagger$ ), post-reaction complexes ( $\Delta G_{pk2}$ ) and products ( $\Delta G_p$ ) for reactions in silane-ammonia plasma at 250 K and 500 Pa. All Gibbs free energies are calculated with MP2/aug-cc-pVTZ//CASPT2/aug-cc-pVTZ method and vibrational contribution to entropy is calculated with MP2/aug-cc-pVTZ. Entropy of hydrogen molecule is taken from NIST-JANAF thermochemical tables.<sup>1</sup> Relative Gibbs free energies are shown relative to reactants.

| reaction                                                                                                                | $\Delta G_r/\text{eV}$ | $\Delta G_{pk1}/\text{eV}$ | $\Delta G^\ddagger/\text{eV}$ | $\Delta G_{pk2}/\text{eV}$ | $\Delta G_p/\text{eV}$ |
|-------------------------------------------------------------------------------------------------------------------------|------------------------|----------------------------|-------------------------------|----------------------------|------------------------|
| $\text{NH}_3 + \text{SiH}_4 \rightarrow \text{SiH}_3\text{NH}_2 + \text{H}_2$                                           | 0.0                    | 0.21                       | 2.20                          | -0.18                      | -0.33                  |
| $\text{NH}_3 + \text{SiH}_3\text{NH}_2 \rightarrow \text{SiH}_2(\text{NH}_2)_2 + \text{H}_2$                            | 0.0                    | 0.24                       | 1.89                          | -0.35                      | -0.49                  |
| $\text{NH}_3 + \text{SiH}_2(\text{NH}_2)_2 \rightarrow \text{SiH}(\text{NH}_2)_3 + \text{H}_2$                          | 0.0                    | 0.17                       | 2.18                          | -0.44                      | -0.55                  |
| $\text{NH}_3 + \text{SiH}(\text{NH}_2)_3 \rightarrow \text{Si}(\text{NH}_2)_4 + \text{H}_2$                             | 0.0                    | 0.25                       | 2.18                          | -0.41                      | -0.58                  |
| $\text{SiH}_4 + \text{NH}_2\text{SiH}_3 \rightarrow (\text{SiH}_3)_2\text{NH} + \text{H}_2$                             | 0.0                    | 0.23                       | 2.18                          | -0.33                      | -0.48                  |
| $\text{SiH}_4 + (\text{SiH}_3)_2\text{NH} \rightarrow (\text{SiH}_3)_3\text{N} + \text{H}_2$                            | 0.0                    | 0.27                       | 2.21                          | -0.33                      | -0.44                  |
| $\text{SiH}_3\text{NH}_2 + (\text{NH}_2)_3\text{SiH} \rightarrow \text{SiH}_3\text{-NH-Si}(\text{NH}_2)_3 + \text{H}_2$ | 0.0                    | 0.23                       | 2.26                          | -0.47                      | -0.61                  |
| $\text{SiH}_3\text{NH}_2 \rightarrow \text{SiHNH}_2 + \text{H}_2$                                                       | 0.0                    | -                          | 2.59                          | 1.48                       | 1.33                   |
| $\text{SiH}_2(\text{NH}_2)_2 \rightarrow \text{Si}(\text{NH}_2)_2 + \text{H}_2$                                         | 0.0                    | -                          | 3.02                          | 1.09                       | 0.96                   |
| $\text{NH}_2 + \text{SiH}_3 \rightarrow \text{SiH}_3\text{NH}_2$                                                        | 0.0                    | -                          | -                             | -                          | -4.09                  |
| $\text{NH}_2 + \text{SiH}_2\text{NH}_2 \rightarrow \text{SiH}_2(\text{NH}_2)_2$                                         | 0.0                    | -                          | -                             | -                          | -4.34                  |
| $\text{NH}_2 + \text{SiH}(\text{NH}_2)_2 \rightarrow \text{SiH}(\text{NH}_2)_3$                                         | 0.0                    | -                          | -                             | -                          | -4.49                  |
| $\text{NH}_2 + \text{Si}(\text{NH}_2)_3 \rightarrow \text{Si}(\text{NH}_2)_4$                                           | 0.0                    | -                          | -                             | -                          | -4.57                  |
| $\text{SiH}_3 + \text{SiH}_3\text{NH} \rightarrow (\text{SiH}_3)_2\text{NH}$                                            | 0.0                    | -                          | -                             | -                          | -4.41                  |
| $\text{SiH}_3 + (\text{SiH}_3)_2\text{N} \rightarrow (\text{SiH}_3)_3\text{N}$                                          | 0.0                    | -                          | -                             | -                          | -5.08                  |
| $\text{SiH}_3 + \text{NH}_3 \rightarrow \text{SiH}_3\text{NH}_3$                                                        | 0.0                    | 0.25                       | 0.44                          | -                          | 0.92                   |
| $\text{NH}_2\text{SiH}_2 + \text{NH}_3 \rightarrow \text{NH}_2\text{SiH}_2\text{NH}_3$                                  | 0.0                    | 0.26                       | 0.92                          | -                          | 0.79                   |
| $(\text{NH}_2)_2\text{SiH} + \text{NH}_3 \rightarrow (\text{NH}_2)_2\text{SiHNH}_3$                                     | 0.0                    | 0.17                       | 0.94                          | -                          | 0.65                   |
| $\text{NH}_3\text{SiH}_3 \rightarrow \text{NH}_2\text{SiH}_3 + \text{H}$                                                | 0.0                    | -                          | 0.27                          | -0.38                      | -0.68                  |
| $\text{NH}_2\text{SiH}_2\text{NH}_3 \rightarrow (\text{NH}_2)_2\text{SiH}_2 + \text{H}$                                 | 0.0                    | -                          | 0.20                          | -0.55                      | -0.83                  |
| $(\text{NH}_2)_2\text{SiHNH}_3 \rightarrow (\text{NH}_2)_3\text{SiH} + \text{H}$                                        | 0.0                    | -                          | 0.12                          | -0.57                      | -0.88                  |
| $(\text{NH}_2)_3\text{SiNH}_3 \rightarrow (\text{NH}_2)_4\text{Si} + \text{H}$                                          | 0.0                    | -                          | 0.14                          | -0.52                      | -0.75                  |
| $\text{SiH}_2 + \text{NH}_3 \rightarrow \text{SiH}_2\text{-NH}_3$                                                       | 0.0                    | -                          | -                             | -                          | -0.73                  |
| $\text{SiH}_2 + \text{NH}_2\text{SiH}_3 \rightarrow \text{SiH}_2\text{-NH}_2\text{SiH}_3$                               | 0.0                    | -                          | -                             | -                          | -0.62                  |
| $\text{SiH}_2 + \text{NH}(\text{SiH}_3)_2 \rightarrow \text{SiH}_2\text{-NH}(\text{SiH}_3)_2$                           | 0.0                    | -                          | -                             | -                          | -0.51                  |
| $\text{SiH}_2\text{-NH}_3 + \text{NH}_3 \rightarrow \text{NH}_3\text{-SiH}_2\text{-NH}_3$                               | 0.0                    | 0.29                       | -                             | -                          | 0.26                   |
| $\text{SiH}_2\text{-NH}_3 \rightarrow \text{SiH}_3\text{NH}_2$                                                          | 0.0                    | -                          | 1.44                          | -                          | -1.74                  |
| $\text{SiH}_2\text{-NH}_2\text{SiH}_3 \rightarrow \text{NH}(\text{SiH}_3)_2$                                            | 0.0                    | -                          | 1.23                          | -                          | -1.94                  |
| $\text{SiH}_2\text{-NH}(\text{SiH}_3)_2 \rightarrow \text{N}(\text{SiH}_3)_3$                                           | 0.0                    | -                          | 1.04                          | -                          | -2.04                  |
| $\text{NH}_2 + \text{SiH}_4 \rightarrow \text{NH}_2\text{SiH}_3 + \text{H}$                                             | 0.0                    | 0.23                       | 0.66                          | -0.24                      | -0.50                  |
| $\text{NH}_2 + \text{NH}_2\text{SiH}_3 \rightarrow (\text{NH}_2)_2\text{SiH}_2 + \text{H}$                              | 0.0                    | 0.18                       | 0.47                          | -0.40                      | -0.66                  |
| $\text{NH}_2 + (\text{NH}_2)_2\text{SiH}_2 \rightarrow (\text{NH}_2)_3\text{SiH} + \text{H}$                            | 0.0                    | 0.16                       | 0.40                          | -0.51                      | -0.85                  |
| $\text{NH}_2 + (\text{NH}_2)_3\text{SiH} \rightarrow (\text{NH}_2)_4\text{Si} + \text{H}$                               | 0.0                    | 0.29                       | 0.54                          | -0.54                      | -0.80                  |
| $\text{SiH}_3 + \text{SiH}_4 \rightarrow \text{SiH}_4 + \text{SiH}_3$                                                   | 0.0                    | 0.34                       | 0.64                          | 0.34                       | 0.01                   |
| $\text{SiH}_3 + \text{NH}_2\text{SiH}_3 \rightarrow \text{NH}_2\text{SiH}_2 + \text{SiH}_4$                             | 0.0                    | 0.24                       | 0.67                          | 0.23                       | 0.03                   |
| $\text{SiH}_3 + (\text{NH}_2)_2\text{SiH}_2 \rightarrow (\text{NH}_2)_2\text{SiH} + \text{SiH}_4$                       | 0.0                    | 0.23                       | 0.70                          | 0.32                       | 0.07                   |
| $\text{SiH}_3 + (\text{NH}_2)_3\text{SiH} \rightarrow (\text{NH}_2)_3\text{Si} + \text{SiH}_4$                          | 0.0                    | 0.27                       | 0.88                          | 0.50                       | 0.19                   |
| $\text{NH}_2 + \text{SiH}_4 \rightarrow \text{SiH}_3 + \text{NH}_3$                                                     | 0.0                    | 0.22                       | 0.57                          | -0.43                      | -0.65                  |
| $\text{NH}_2 + \text{NH}_2\text{SiH}_3 \rightarrow \text{NH}_2\text{SiH}_2 + \text{NH}_3$                               | 0.0                    | 0.34                       | 0.63                          | -0.49                      | -0.65                  |
| $\text{NH}_2 + (\text{NH}_2)_2\text{SiH}_2 \rightarrow (\text{NH}_2)_2\text{SiH} + \text{NH}_3$                         | 0.0                    | 0.21                       | 0.61                          | -0.38                      | -0.56                  |
| $\text{NH}_2 + (\text{NH}_2)_3\text{SiH} \rightarrow (\text{NH}_2)_3\text{Si} + \text{NH}_3$                            | 0.0                    | 0.29                       | 0.58                          | -0.19                      | -0.44                  |
| $\text{SiH}_4 + \text{H} \rightarrow \text{SiH}_3 + \text{H}_2$                                                         | 0.0                    | 0.25                       | 0.50                          | -0.26                      | -0.40                  |
| $\text{NH}_2\text{SiH}_3 + \text{H} \rightarrow \text{NH}_2\text{SiH}_2 + \text{H}_2$                                   | 0.0                    | 0.29                       | 0.44                          | -0.22                      | -0.37                  |
| $(\text{NH}_2)_2\text{SiH}_2 + \text{H} \rightarrow (\text{NH}_2)_2\text{SiH} + \text{H}_2$                             | 0.0                    | 0.29                       | 0.52                          | -0.14                      | -0.32                  |
| $(\text{NH}_2)_3\text{SiH} + \text{H} \rightarrow (\text{NH}_2)_3\text{Si} + \text{H}_2$                                | 0.0                    | 0.30                       | 0.51                          | -0.01                      | -0.20                  |

Table 16: Relative Gibbs free energies of reactants ( $\Delta G_r$ ) pre-reaction complexes( $\Delta G_{pk1}$ ), transition states ( $\Delta G^\ddagger$ ), post-reaction complexes ( $\Delta G_{pk2}$ ) and products ( $\Delta G_p$ ) for reactions in silane-ammonia plasma at 300 K and 50 Pa. All Gibbs free energies are calculated with MP2/aug-cc-pVTZ//CASPT2/aug-cc-pVTZ method and vibrational contribution to entropy is calculated with MP2/aug-cc-pVTZ. Entropy of hydrogen molecule is taken from NIST-JANAF thermochemical tables.<sup>1</sup> Relative Gibbs free energies are shown relative to reactants.

| reaction                                                                                                                    | $\Delta G_r/\text{eV}$ | $\Delta G_{pk1}/\text{eV}$ | $\Delta G^\ddagger/\text{eV}$ | $\Delta G_{pk2}/\text{eV}$ | $\Delta G_p/\text{eV}$ |
|-----------------------------------------------------------------------------------------------------------------------------|------------------------|----------------------------|-------------------------------|----------------------------|------------------------|
| $\text{NH}_3 + \text{SiH}_4 \longrightarrow \text{SiH}_3\text{NH}_2 + \text{H}_2$                                           | 0.0                    | 0.32                       | 2.34                          | -0.07                      | -0.25                  |
| $\text{NH}_3 + \text{SiH}_3\text{NH}_2 \longrightarrow \text{SiH}_2(\text{NH}_2)_2 + \text{H}_2$                            | 0.0                    | 0.37                       | 2.05                          | -0.21                      | -0.39                  |
| $\text{NH}_3 + \text{SiH}_2(\text{NH}_2)_2 \longrightarrow \text{SiH}(\text{NH}_2)_3 + \text{H}_2$                          | 0.0                    | 0.30                       | 2.35                          | -0.31                      | -0.45                  |
| $\text{NH}_3 + \text{SiH}(\text{NH}_2)_3 \longrightarrow \text{Si}(\text{NH}_2)_4 + \text{H}_2$                             | 0.0                    | 0.39                       | 2.35                          | -0.27                      | -0.47                  |
| $\text{SiH}_4 + \text{NH}_2\text{SiH}_3 \longrightarrow (\text{SiH}_3)_2\text{NH} + \text{H}_2$                             | 0.0                    | 0.36                       | 2.33                          | -0.21                      | -0.39                  |
| $\text{SiH}_4 + (\text{SiH}_3)_2\text{NH} \longrightarrow (\text{SiH}_3)_3\text{N} + \text{H}_2$                            | 0.0                    | 0.42                       | 2.38                          | -0.20                      | -0.33                  |
| $\text{SiH}_3\text{NH}_2 + (\text{NH}_2)_3\text{SiH} \longrightarrow \text{SiH}_3\text{-NH-Si}(\text{NH}_2)_3 + \text{H}_2$ | 0.0                    | 0.37                       | 2.44                          | -0.32                      | -0.50                  |
| $\text{SiH}_3\text{NH}_2 \longrightarrow \text{SiHNH}_2 + \text{H}_2$                                                       | 0.0                    | -                          | 2.59                          | 1.45                       | 1.27                   |
| $\text{SiH}_2(\text{NH}_2)_2 \longrightarrow \text{Si}(\text{NH}_2)_2 + \text{H}_2$                                         | 0.0                    | -                          | 3.03                          | 1.06                       | 0.90                   |
| $\text{NH}_2 + \text{SiH}_3 \longrightarrow \text{SiH}_3\text{NH}_2$                                                        | 0.0                    | -                          | -                             | -                          | -3.93                  |
| $\text{NH}_2 + \text{SiH}_2\text{NH}_2 \longrightarrow \text{SiH}_2(\text{NH}_2)_2$                                         | 0.0                    | -                          | -                             | -                          | -4.17                  |
| $\text{NH}_2 + \text{SiH}(\text{NH}_2)_2 \longrightarrow \text{SiH}(\text{NH}_2)_3$                                         | 0.0                    | -                          | -                             | -                          | -4.32                  |
| $\text{NH}_2 + \text{Si}(\text{NH}_2)_3 \longrightarrow \text{Si}(\text{NH}_2)_4$                                           | 0.0                    | -                          | -                             | -                          | -4.39                  |
| $\text{SiH}_3 + \text{SiH}_3\text{NH} \longrightarrow (\text{SiH}_3)_2\text{NH}$                                            | 0.0                    | -                          | -                             | -                          | -4.23                  |
| $\text{SiH}_3 + (\text{SiH}_3)_2\text{N} \longrightarrow (\text{SiH}_3)_3\text{N}$                                          | 0.0                    | -                          | -                             | -                          | -4.90                  |
| $\text{SiH}_3 + \text{NH}_3 \longrightarrow \text{SiH}_3\text{NH}_3$                                                        | 0.0                    | 0.37                       | 0.59                          | -                          | 1.08                   |
| $\text{NH}_2\text{SiH}_2 + \text{NH}_3 \longrightarrow \text{NH}_2\text{SiH}_2\text{NH}_3$                                  | 0.0                    | 0.39                       | 1.08                          | -                          | 0.95                   |
| $(\text{NH}_2)_2\text{SiH} + \text{NH}_3 \longrightarrow (\text{NH}_2)_2\text{SiHNH}_3$                                     | 0.0                    | 0.29                       | 1.10                          | -                          | 0.81                   |
| $\text{NH}_3\text{SiH}_3 \longrightarrow \text{NH}_2\text{SiH}_3 + \text{H}$                                                | 0.0                    | -                          | 0.27                          | -0.39                      | -0.81                  |
| $\text{NH}_2\text{SiH}_2\text{NH}_3 \longrightarrow (\text{NH}_2)_2\text{SiH}_2 + \text{H}$                                 | 0.0                    | -                          | 0.21                          | -0.56                      | -0.96                  |
| $(\text{NH}_2)_2\text{SiHNH}_3 \longrightarrow (\text{NH}_2)_3\text{SiH} + \text{H}$                                        | 0.0                    | -                          | 0.12                          | -0.58                      | -1.01                  |
| $(\text{NH}_2)_3\text{SiNH}_3 \longrightarrow (\text{NH}_2)_4\text{Si} + \text{H}$                                          | 0.0                    | -                          | 0.14                          | -0.53                      | -0.88                  |
| $\text{SiH}_2 + \text{NH}_3 \longrightarrow \text{SiH}_2\text{-NH}_3$                                                       | 0.0                    | -                          | -                             | -                          | -0.57                  |
| $\text{SiH}_2 + \text{NH}_2\text{SiH}_3 \longrightarrow \text{SiH}_2\text{-NH}_2\text{SiH}_3$                               | 0.0                    | -                          | -                             | -                          | -0.46                  |
| $\text{SiH}_2 + \text{NH}(\text{SiH}_3)_2 \longrightarrow \text{SiH}_2\text{-NH}(\text{SiH}_3)_2$                           | 0.0                    | -                          | -                             | -                          | -0.36                  |
| $\text{SiH}_2\text{-NH}_3 + \text{NH}_3 \longrightarrow \text{NH}_3\text{-SiH}_2\text{-NH}_3$                               | 0.0                    | 0.41                       | -                             | -                          | 0.41                   |
| $\text{SiH}_2\text{-NH}_3 \longrightarrow \text{SiH}_3\text{NH}_2$                                                          | 0.0                    | -                          | 1.44                          | -                          | -1.75                  |
| $\text{SiH}_2\text{-NH}_2\text{SiH}_3 \longrightarrow \text{NH}(\text{SiH}_3)_2$                                            | 0.0                    | -                          | 1.22                          | -                          | -1.93                  |
| $\text{SiH}_2\text{-NH}(\text{SiH}_3)_2 \longrightarrow \text{N}(\text{SiH}_3)_3$                                           | 0.0                    | -                          | 1.05                          | -                          | -2.04                  |
| $\text{NH}_2 + \text{SiH}_4 \longrightarrow \text{NH}_2\text{SiH}_3 + \text{H}$                                             | 0.0                    | 0.36                       | 0.81                          | -0.11                      | -0.49                  |
| $\text{NH}_2 + \text{NH}_2\text{SiH}_3 \longrightarrow (\text{NH}_2)_2\text{SiH}_2 + \text{H}$                              | 0.0                    | 0.30                       | 0.64                          | -0.26                      | -0.63                  |
| $\text{NH}_2 + (\text{NH}_2)_2\text{SiH}_2 \longrightarrow (\text{NH}_2)_3\text{SiH} + \text{H}$                            | 0.0                    | 0.30                       | 0.56                          | -0.37                      | -0.82                  |
| $\text{NH}_2 + (\text{NH}_2)_3\text{SiH} \longrightarrow (\text{NH}_2)_4\text{Si} + \text{H}$                               | 0.0                    | 0.43                       | 0.70                          | -0.39                      | -0.77                  |
| $\text{SiH}_3 + \text{SiH}_4 \longrightarrow \text{SiH}_4 + \text{SiH}_3$                                                   | 0.0                    | 0.48                       | 0.77                          | 0.48                       | 0.02                   |
| $\text{SiH}_3 + \text{NH}_2\text{SiH}_3 \longrightarrow \text{NH}_2\text{SiH}_2 + \text{SiH}_4$                             | 0.0                    | 0.36                       | 0.80                          | 0.35                       | 0.03                   |
| $\text{SiH}_3 + (\text{NH}_2)_2\text{SiH}_2 \longrightarrow (\text{NH}_2)_2\text{SiH} + \text{SiH}_4$                       | 0.0                    | 0.37                       | 0.83                          | 0.45                       | 0.07                   |
| $\text{SiH}_3 + (\text{NH}_2)_3\text{SiH} \longrightarrow (\text{NH}_2)_3\text{Si} + \text{SiH}_4$                          | 0.0                    | 0.40                       | 1.03                          | 0.63                       | 0.19                   |
| $\text{NH}_2 + \text{SiH}_4 \longrightarrow \text{SiH}_3 + \text{NH}_3$                                                     | 0.0                    | 0.34                       | 0.70                          | -0.33                      | -0.66                  |
| $\text{NH}_2 + \text{NH}_2\text{SiH}_3 \longrightarrow \text{NH}_2\text{SiH}_2 + \text{NH}_3$                               | 0.0                    | 0.46                       | 0.77                          | -0.36                      | -0.65                  |
| $\text{NH}_2 + (\text{NH}_2)_2\text{SiH}_2 \longrightarrow (\text{NH}_2)_2\text{SiH} + \text{NH}_3$                         | 0.0                    | 0.34                       | 0.75                          | -0.26                      | -0.56                  |
| $\text{NH}_2 + (\text{NH}_2)_3\text{SiH} \longrightarrow (\text{NH}_2)_3\text{Si} + \text{NH}_3$                            | 0.0                    | 0.43                       | 0.72                          | -0.05                      | -0.45                  |
| $\text{SiH}_4 + \text{H} \longrightarrow \text{SiH}_3 + \text{H}_2$                                                         | 0.0                    | 0.37                       | 0.62                          | -0.16                      | -0.33                  |
| $\text{NH}_2\text{SiH}_3 + \text{H} \longrightarrow \text{NH}_2\text{SiH}_2 + \text{H}_2$                                   | 0.0                    | 0.42                       | 0.57                          | -0.10                      | -0.29                  |
| $(\text{NH}_2)_2\text{SiH}_2 + \text{H} \longrightarrow (\text{NH}_2)_2\text{SiH} + \text{H}_2$                             | 0.0                    | 0.41                       | 0.65                          | -0.02                      | -0.25                  |
| $(\text{NH}_2)_3\text{SiH} + \text{H} \longrightarrow (\text{NH}_2)_3\text{Si} + \text{H}_2$                                | 0.0                    | 0.43                       | 0.63                          | 0.10                       | -0.13                  |

Table 17: Relative Gibbs free energies of reactants ( $\Delta G_r$ ), pre-reaction complexes( $\Delta G_{pk1}$ ), transition states ( $\Delta G^\ddagger$ ), post-reaction complexes ( $\Delta G_{pk2}$ ) and products ( $\Delta G_p$ ) for reactions in silane-ammonia plasma at 300 K and 100 Pa. All Gibbs free energies are calculated with MP2/aug-cc-pVTZ//CASPT2/aug-cc-pVTZ method and vibrational contribution to entropy is calculated with MP2/aug-cc-pVTZ. Entropy of hydrogen molecule is taken from NIST-JANAF thermochemical tables.<sup>1</sup> Relative Gibbs free energies are shown relative to reactants.

| reaction                                                                                                                | $\Delta G_r/\text{eV}$ | $\Delta G_{pk1}/\text{eV}$ | $\Delta G^\ddagger/\text{eV}$ | $\Delta G_{pk2}/\text{eV}$ | $\Delta G_p/\text{eV}$ |
|-------------------------------------------------------------------------------------------------------------------------|------------------------|----------------------------|-------------------------------|----------------------------|------------------------|
| $\text{NH}_3 + \text{SiH}_4 \rightarrow \text{SiH}_3\text{NH}_2 + \text{H}_2$                                           | 0.0                    | 0.30                       | 2.33                          | -0.09                      | -0.27                  |
| $\text{NH}_3 + \text{SiH}_3\text{NH}_2 \rightarrow \text{SiH}_2(\text{NH}_2)_2 + \text{H}_2$                            | 0.0                    | 0.35                       | 2.04                          | -0.23                      | -0.40                  |
| $\text{NH}_3 + \text{SiH}_2(\text{NH}_2)_2 \rightarrow \text{SiH}(\text{NH}_2)_3 + \text{H}_2$                          | 0.0                    | 0.28                       | 2.33                          | -0.33                      | -0.47                  |
| $\text{NH}_3 + \text{SiH}(\text{NH}_2)_3 \rightarrow \text{Si}(\text{NH}_2)_4 + \text{H}_2$                             | 0.0                    | 0.37                       | 2.33                          | -0.28                      | -0.49                  |
| $\text{SiH}_4 + \text{NH}_2\text{SiH}_3 \rightarrow (\text{SiH}_3)_2\text{NH} + \text{H}_2$                             | 0.0                    | 0.34                       | 2.32                          | -0.23                      | -0.41                  |
| $\text{SiH}_4 + (\text{SiH}_3)_2\text{NH} \rightarrow (\text{SiH}_3)_3\text{N} + \text{H}_2$                            | 0.0                    | 0.40                       | 2.36                          | -0.21                      | -0.35                  |
| $\text{SiH}_3\text{NH}_2 + (\text{NH}_2)_3\text{SiH} \rightarrow \text{SiH}_3\text{-NH-Si}(\text{NH}_2)_3 + \text{H}_2$ | 0.0                    | 0.35                       | 2.42                          | -0.34                      | -0.51                  |
| $\text{SiH}_3\text{NH}_2 \rightarrow \text{SiHNH}_2 + \text{H}_2$                                                       | 0.0                    | -                          | 2.59                          | 1.45                       | 1.27                   |
| $\text{SiH}_2(\text{NH}_2)_2 \rightarrow \text{Si}(\text{NH}_2)_2 + \text{H}_2$                                         | 0.0                    | -                          | 3.03                          | 1.06                       | 0.90                   |
| $\text{NH}_2 + \text{SiH}_3 \rightarrow \text{SiH}_3\text{NH}_2$                                                        | 0.0                    | -                          | -                             | -                          | -3.94                  |
| $\text{NH}_2 + \text{SiH}_2\text{NH}_2 \rightarrow \text{SiH}_2(\text{NH}_2)_2$                                         | 0.0                    | -                          | -                             | -                          | -4.19                  |
| $\text{NH}_2 + \text{SiH}(\text{NH}_2)_2 \rightarrow \text{SiH}(\text{NH}_2)_3$                                         | 0.0                    | -                          | -                             | -                          | -4.34                  |
| $\text{NH}_2 + \text{Si}(\text{NH}_2)_3 \rightarrow \text{Si}(\text{NH}_2)_4$                                           | 0.0                    | -                          | -                             | -                          | -4.41                  |
| $\text{SiH}_3 + \text{SiH}_3\text{NH} \rightarrow (\text{SiH}_3)_2\text{NH}$                                            | 0.0                    | -                          | -                             | -                          | -4.25                  |
| $\text{SiH}_3 + (\text{SiH}_3)_2\text{N} \rightarrow (\text{SiH}_3)_3\text{N}$                                          | 0.0                    | -                          | -                             | -                          | -4.92                  |
| $\text{SiH}_3 + \text{NH}_3 \rightarrow \text{SiH}_3\text{NH}_3$                                                        | 0.0                    | 0.35                       | 0.57                          | -                          | 1.06                   |
| $\text{NH}_2\text{SiH}_2 + \text{NH}_3 \rightarrow \text{NH}_2\text{SiH}_2\text{NH}_3$                                  | 0.0                    | 0.38                       | 1.06                          | -                          | 0.94                   |
| $(\text{NH}_2)_2\text{SiH} + \text{NH}_3 \rightarrow (\text{NH}_2)_2\text{SiHNH}_3$                                     | 0.0                    | 0.27                       | 1.08                          | -                          | 0.79                   |
| $\text{NH}_3\text{SiH}_3 \rightarrow \text{NH}_2\text{SiH}_3 + \text{H}$                                                | 0.0                    | -                          | 0.27                          | -0.39                      | -0.80                  |
| $\text{NH}_2\text{SiH}_2\text{NH}_3 \rightarrow (\text{NH}_2)_2\text{SiH}_2 + \text{H}$                                 | 0.0                    | -                          | 0.21                          | -0.56                      | -0.94                  |
| $(\text{NH}_2)_2\text{SiHNH}_3 \rightarrow (\text{NH}_2)_3\text{SiH} + \text{H}$                                        | 0.0                    | -                          | 0.12                          | -0.58                      | -1.00                  |
| $(\text{NH}_2)_3\text{SiNH}_3 \rightarrow (\text{NH}_2)_4\text{Si} + \text{H}$                                          | 0.0                    | -                          | 0.14                          | -0.53                      | -0.86                  |
| $\text{SiH}_2 + \text{NH}_3 \rightarrow \text{SiH}_2\text{-NH}_3$                                                       | 0.0                    | -                          | -                             | -                          | -0.59                  |
| $\text{SiH}_2 + \text{NH}_2\text{SiH}_3 \rightarrow \text{SiH}_2\text{-NH}_2\text{SiH}_3$                               | 0.0                    | -                          | -                             | -                          | -0.48                  |
| $\text{SiH}_2 + \text{NH}(\text{SiH}_3)_2 \rightarrow \text{SiH}_2\text{-NH}(\text{SiH}_3)_2$                           | 0.0                    | -                          | -                             | -                          | -0.37                  |
| $\text{SiH}_2\text{-NH}_3 + \text{NH}_3 \rightarrow \text{NH}_3\text{-SiH}_2\text{-NH}_3$                               | 0.0                    | 0.39                       | -                             | -                          | 0.39                   |
| $\text{SiH}_2\text{-NH}_3 \rightarrow \text{SiH}_3\text{NH}_2$                                                          | 0.0                    | -                          | 1.44                          | -                          | -1.75                  |
| $\text{SiH}_2\text{-NH}_2\text{SiH}_3 \rightarrow \text{NH}(\text{SiH}_3)_2$                                            | 0.0                    | -                          | 1.22                          | -                          | -1.93                  |
| $\text{SiH}_2\text{-NH}(\text{SiH}_3)_2 \rightarrow \text{N}(\text{SiH}_3)_3$                                           | 0.0                    | -                          | 1.05                          | -                          | -2.04                  |
| $\text{NH}_2 + \text{SiH}_4 \rightarrow \text{NH}_2\text{SiH}_3 + \text{H}$                                             | 0.0                    | 0.34                       | 0.80                          | -0.12                      | -0.49                  |
| $\text{NH}_2 + \text{NH}_2\text{SiH}_3 \rightarrow (\text{NH}_2)_2\text{SiH}_2 + \text{H}$                              | 0.0                    | 0.28                       | 0.62                          | -0.27                      | -0.63                  |
| $\text{NH}_2 + (\text{NH}_2)_2\text{SiH}_2 \rightarrow (\text{NH}_2)_3\text{SiH} + \text{H}$                            | 0.0                    | 0.29                       | 0.54                          | -0.39                      | -0.82                  |
| $\text{NH}_2 + (\text{NH}_2)_3\text{SiH} \rightarrow (\text{NH}_2)_4\text{Si} + \text{H}$                               | 0.0                    | 0.41                       | 0.68                          | -0.41                      | -0.77                  |
| $\text{SiH}_3 + \text{SiH}_4 \rightarrow \text{SiH}_4 + \text{SiH}_3$                                                   | 0.0                    | 0.47                       | 0.75                          | 0.47                       | 0.02                   |
| $\text{SiH}_3 + \text{NH}_2\text{SiH}_3 \rightarrow \text{NH}_2\text{SiH}_2 + \text{SiH}_4$                             | 0.0                    | 0.35                       | 0.78                          | 0.33                       | 0.03                   |
| $\text{SiH}_3 + (\text{NH}_2)_2\text{SiH}_2 \rightarrow (\text{NH}_2)_2\text{SiH} + \text{SiH}_4$                       | 0.0                    | 0.35                       | 0.81                          | 0.43                       | 0.07                   |
| $\text{SiH}_3 + (\text{NH}_2)_3\text{SiH} \rightarrow (\text{NH}_2)_3\text{Si} + \text{SiH}_4$                          | 0.0                    | 0.39                       | 1.01                          | 0.61                       | 0.19                   |
| $\text{NH}_2 + \text{SiH}_4 \rightarrow \text{SiH}_3 + \text{NH}_3$                                                     | 0.0                    | 0.32                       | 0.69                          | -0.35                      | -0.66                  |
| $\text{NH}_2 + \text{NH}_2\text{SiH}_3 \rightarrow \text{NH}_2\text{SiH}_2 + \text{NH}_3$                               | 0.0                    | 0.44                       | 0.76                          | -0.38                      | -0.65                  |
| $\text{NH}_2 + (\text{NH}_2)_2\text{SiH}_2 \rightarrow (\text{NH}_2)_2\text{SiH} + \text{NH}_3$                         | 0.0                    | 0.32                       | 0.74                          | -0.28                      | -0.56                  |
| $\text{NH}_2 + (\text{NH}_2)_3\text{SiH} \rightarrow (\text{NH}_2)_3\text{Si} + \text{NH}_3$                            | 0.0                    | 0.41                       | 0.70                          | -0.07                      | -0.45                  |
| $\text{SiH}_4 + \text{H} \rightarrow \text{SiH}_3 + \text{H}_2$                                                         | 0.0                    | 0.35                       | 0.60                          | -0.18                      | -0.35                  |
| $\text{NH}_2\text{SiH}_3 + \text{H} \rightarrow \text{NH}_2\text{SiH}_2 + \text{H}_2$                                   | 0.0                    | 0.40                       | 0.55                          | -0.12                      | -0.31                  |
| $(\text{NH}_2)_2\text{SiH}_2 + \text{H} \rightarrow (\text{NH}_2)_2\text{SiH} + \text{H}_2$                             | 0.0                    | 0.40                       | 0.63                          | -0.04                      | -0.27                  |
| $(\text{NH}_2)_3\text{SiH} + \text{H} \rightarrow (\text{NH}_2)_3\text{Si} + \text{H}_2$                                | 0.0                    | 0.41                       | 0.62                          | 0.09                       | -0.14                  |

Table 18: Relative Gibbs free energies of reactants ( $\Delta G_r$ ), pre-reaction complexes( $\Delta G_{pk1}$ ), transition states ( $\Delta G^\ddagger$ ), post-reaction complexes ( $\Delta G_{pk2}$ ) and products ( $\Delta G_p$ ) for reactions in silane-ammonia plasma at 300 K and 200 Pa. All Gibbs free energies are calculated with MP2/aug-cc-pVTZ//CASPT2/aug-cc-pVTZ method and vibrational contribution to entropy is calculated with MP2/aug-cc-pVTZ. Entropy of hydrogen molecule is taken from NIST-JANAF thermochemical tables.<sup>1</sup> Relative Gibbs free energies are shown relative to reactants.

| reaction                                                                                                                | $\Delta G_r/\text{eV}$ | $\Delta G_{pk1}/\text{eV}$ | $\Delta G^\ddagger/\text{eV}$ | $\Delta G_{pk2}/\text{eV}$ | $\Delta G_p/\text{eV}$ |
|-------------------------------------------------------------------------------------------------------------------------|------------------------|----------------------------|-------------------------------|----------------------------|------------------------|
| $\text{NH}_3 + \text{SiH}_4 \rightarrow \text{SiH}_3\text{NH}_2 + \text{H}_2$                                           | 0.0                    | 0.28                       | 2.31                          | -0.10                      | -0.28                  |
| $\text{NH}_3 + \text{SiH}_3\text{NH}_2 \rightarrow \text{SiH}_2(\text{NH}_2)_2 + \text{H}_2$                            | 0.0                    | 0.33                       | 2.02                          | -0.25                      | -0.42                  |
| $\text{NH}_3 + \text{SiH}_2(\text{NH}_2)_2 \rightarrow \text{SiH}(\text{NH}_2)_3 + \text{H}_2$                          | 0.0                    | 0.26                       | 2.31                          | -0.35                      | -0.49                  |
| $\text{NH}_3 + \text{SiH}(\text{NH}_2)_3 \rightarrow \text{Si}(\text{NH}_2)_4 + \text{H}_2$                             | 0.0                    | 0.35                       | 2.32                          | -0.30                      | -0.51                  |
| $\text{SiH}_4 + \text{NH}_2\text{SiH}_3 \rightarrow (\text{SiH}_3)_2\text{NH} + \text{H}_2$                             | 0.0                    | 0.32                       | 2.30                          | -0.24                      | -0.43                  |
| $\text{SiH}_4 + (\text{SiH}_3)_2\text{NH} \rightarrow (\text{SiH}_3)_3\text{N} + \text{H}_2$                            | 0.0                    | 0.38                       | 2.35                          | -0.23                      | -0.37                  |
| $\text{SiH}_3\text{NH}_2 + (\text{NH}_2)_3\text{SiH} \rightarrow \text{SiH}_3\text{-NH-Si}(\text{NH}_2)_3 + \text{H}_2$ | 0.0                    | 0.34                       | 2.40                          | -0.36                      | -0.53                  |
| $\text{SiH}_3\text{NH}_2 \rightarrow \text{SiHNH}_2 + \text{H}_2$                                                       | 0.0                    | -                          | 2.59                          | 1.45                       | 1.27                   |
| $\text{SiH}_2(\text{NH}_2)_2 \rightarrow \text{Si}(\text{NH}_2)_2 + \text{H}_2$                                         | 0.0                    | -                          | 3.03                          | 1.06                       | 0.90                   |
| $\text{NH}_2 + \text{SiH}_3 \rightarrow \text{SiH}_3\text{NH}_2$                                                        | 0.0                    | -                          | -                             | -                          | -3.96                  |
| $\text{NH}_2 + \text{SiH}_2\text{NH}_2 \rightarrow \text{SiH}_2(\text{NH}_2)_2$                                         | 0.0                    | -                          | -                             | -                          | -4.21                  |
| $\text{NH}_2 + \text{SiH}(\text{NH}_2)_2 \rightarrow \text{SiH}(\text{NH}_2)_3$                                         | 0.0                    | -                          | -                             | -                          | -4.36                  |
| $\text{NH}_2 + \text{Si}(\text{NH}_2)_3 \rightarrow \text{Si}(\text{NH}_2)_4$                                           | 0.0                    | -                          | -                             | -                          | -4.43                  |
| $\text{SiH}_3 + \text{SiH}_3\text{NH} \rightarrow (\text{SiH}_3)_2\text{NH}$                                            | 0.0                    | -                          | -                             | -                          | -4.27                  |
| $\text{SiH}_3 + (\text{SiH}_3)_2\text{N} \rightarrow (\text{SiH}_3)_3\text{N}$                                          | 0.0                    | -                          | -                             | -                          | -4.93                  |
| $\text{SiH}_3 + \text{NH}_3 \rightarrow \text{SiH}_3\text{NH}_3$                                                        | 0.0                    | 0.33                       | 0.56                          | -                          | 1.04                   |
| $\text{NH}_2\text{SiH}_2 + \text{NH}_3 \rightarrow \text{NH}_2\text{SiH}_2\text{NH}_3$                                  | 0.0                    | 0.36                       | 1.04                          | -                          | 0.92                   |
| $(\text{NH}_2)_2\text{SiH} + \text{NH}_3 \rightarrow (\text{NH}_2)_2\text{SiHNH}_3$                                     | 0.0                    | 0.25                       | 1.06                          | -                          | 0.77                   |
| $\text{NH}_3\text{SiH}_3 \rightarrow \text{NH}_2\text{SiH}_3 + \text{H}$                                                | 0.0                    | -                          | 0.27                          | -0.39                      | -0.78                  |
| $\text{NH}_2\text{SiH}_2\text{NH}_3 \rightarrow (\text{NH}_2)_2\text{SiH}_2 + \text{H}$                                 | 0.0                    | -                          | 0.21                          | -0.56                      | -0.92                  |
| $(\text{NH}_2)_2\text{SiHNH}_3 \rightarrow (\text{NH}_2)_3\text{SiH} + \text{H}$                                        | 0.0                    | -                          | 0.12                          | -0.58                      | -0.98                  |
| $(\text{NH}_2)_3\text{SiNH}_3 \rightarrow (\text{NH}_2)_4\text{Si} + \text{H}$                                          | 0.0                    | -                          | 0.14                          | -0.53                      | -0.84                  |
| $\text{SiH}_2 + \text{NH}_3 \rightarrow \text{SiH}_2\text{-NH}_3$                                                       | 0.0                    | -                          | -                             | -                          | -0.61                  |
| $\text{SiH}_2 + \text{NH}_2\text{SiH}_3 \rightarrow \text{SiH}_2\text{-NH}_2\text{SiH}_3$                               | 0.0                    | -                          | -                             | -                          | -0.50                  |
| $\text{SiH}_2 + \text{NH}(\text{SiH}_3)_2 \rightarrow \text{SiH}_2\text{-NH}(\text{SiH}_3)_2$                           | 0.0                    | -                          | -                             | -                          | -0.39                  |
| $\text{SiH}_2\text{-NH}_3 + \text{NH}_3 \rightarrow \text{NH}_3\text{-SiH}_2\text{-NH}_3$                               | 0.0                    | 0.38                       | -                             | -                          | 0.37                   |
| $\text{SiH}_2\text{-NH}_3 \rightarrow \text{SiH}_3\text{NH}_2$                                                          | 0.0                    | -                          | 1.44                          | -                          | -1.75                  |
| $\text{SiH}_2\text{-NH}_2\text{SiH}_3 \rightarrow \text{NH}(\text{SiH}_3)_2$                                            | 0.0                    | -                          | 1.22                          | -                          | -1.93                  |
| $\text{SiH}_2\text{-NH}(\text{SiH}_3)_2 \rightarrow \text{N}(\text{SiH}_3)_3$                                           | 0.0                    | -                          | 1.05                          | -                          | -2.04                  |
| $\text{NH}_2 + \text{SiH}_4 \rightarrow \text{NH}_2\text{SiH}_3 + \text{H}$                                             | 0.0                    | 0.32                       | 0.78                          | -0.14                      | -0.49                  |
| $\text{NH}_2 + \text{NH}_2\text{SiH}_3 \rightarrow (\text{NH}_2)_2\text{SiH}_2 + \text{H}$                              | 0.0                    | 0.26                       | 0.60                          | -0.08                      | -0.63                  |
| $\text{NH}_2 + (\text{NH}_2)_2\text{SiH}_2 \rightarrow (\text{NH}_2)_3\text{SiH} + \text{H}$                            | 0.0                    | 0.27                       | 0.52                          | -0.41                      | -0.82                  |
| $\text{NH}_2 + (\text{NH}_2)_3\text{SiH} \rightarrow (\text{NH}_2)_4\text{Si} + \text{H}$                               | 0.0                    | 0.39                       | 0.67                          | -0.43                      | -0.77                  |
| $\text{SiH}_3 + \text{SiH}_4 \rightarrow \text{SiH}_4 + \text{SiH}_3$                                                   | 0.0                    | 0.45                       | 0.73                          | 0.45                       | 0.02                   |
| $\text{SiH}_3 + \text{NH}_2\text{SiH}_3 \rightarrow \text{NH}_2\text{SiH}_2 + \text{SiH}_4$                             | 0.0                    | 0.33                       | 0.76                          | 0.31                       | 0.03                   |
| $\text{SiH}_3 + (\text{NH}_2)_2\text{SiH}_2 \rightarrow (\text{NH}_2)_2\text{SiH} + \text{SiH}_4$                       | 0.0                    | 0.33                       | 0.80                          | 0.41                       | 0.07                   |
| $\text{SiH}_3 + (\text{NH}_2)_3\text{SiH} \rightarrow (\text{NH}_2)_3\text{Si} + \text{SiH}_4$                          | 0.0                    | 0.37                       | 0.99                          | 0.60                       | 0.19                   |
| $\text{NH}_2 + \text{SiH}_4 \rightarrow \text{SiH}_3 + \text{NH}_3$                                                     | 0.0                    | 0.31                       | 0.67                          | -0.36                      | -0.66                  |
| $\text{NH}_2 + \text{NH}_2\text{SiH}_3 \rightarrow \text{NH}_2\text{SiH}_2 + \text{NH}_3$                               | 0.0                    | 0.43                       | 0.74                          | -0.40                      | -0.65                  |
| $\text{NH}_2 + (\text{NH}_2)_2\text{SiH}_2 \rightarrow (\text{NH}_2)_2\text{SiH} + \text{NH}_3$                         | 0.0                    | 0.30                       | 0.72                          | -0.30                      | -0.56                  |
| $\text{NH}_2 + (\text{NH}_2)_3\text{SiH} \rightarrow (\text{NH}_2)_3\text{Si} + \text{NH}_3$                            | 0.0                    | 0.39                       | 0.68                          | -0.09                      | -0.45                  |
| $\text{SiH}_4 + \text{H} \rightarrow \text{SiH}_3 + \text{H}_2$                                                         | 0.0                    | 0.33                       | 0.59                          | -0.20                      | -0.37                  |
| $\text{NH}_2\text{SiH}_3 + \text{H} \rightarrow \text{NH}_2\text{SiH}_2 + \text{H}_2$                                   | 0.0                    | 0.39                       | 0.53                          | -0.14                      | -0.33                  |
| $(\text{NH}_2)_2\text{SiH}_2 + \text{H} \rightarrow (\text{NH}_2)_2\text{SiH} + \text{H}_2$                             | 0.0                    | 0.38                       | 0.61                          | -0.06                      | -0.28                  |
| $(\text{NH}_2)_3\text{SiH} + \text{H} \rightarrow (\text{NH}_2)_3\text{Si} + \text{H}_2$                                | 0.0                    | 0.39                       | 0.60                          | 0.07                       | -0.16                  |

Table 19: Relative Gibbs free energies of reactants ( $\Delta G_r$ ), pre-reaction complexes( $\Delta G_{pk1}$ ), transition states ( $\Delta G^\ddagger$ ), post-reaction complexes ( $\Delta G_{pk2}$ ) and products ( $\Delta G_p$ ) for reactions in silane-ammonia plasma at 300 K and 300 Pa. All Gibbs free energies are calculated with MP2/aug-cc-pVTZ//CASPT2/aug-cc-pVTZ method and vibrational contribution to entropy is calculated with MP2/aug-cc-pVTZ. Entropy of hydrogen molecule is taken from NIST-JANAF thermochemical tables.<sup>1</sup> Relative Gibbs free energies are shown relative to reactants.

| reaction                                                                                                                | $\Delta G_r/\text{eV}$ | $\Delta G_{pk1}/\text{eV}$ | $\Delta G^\ddagger/\text{eV}$ | $\Delta G_{pk2}/\text{eV}$ | $\Delta G_p/\text{eV}$ |
|-------------------------------------------------------------------------------------------------------------------------|------------------------|----------------------------|-------------------------------|----------------------------|------------------------|
| $\text{NH}_3 + \text{SiH}_4 \rightarrow \text{SiH}_3\text{NH}_2 + \text{H}_2$                                           | 0.0                    | 0.27                       | 2.30                          | -0.11                      | -0.29                  |
| $\text{NH}_3 + \text{SiH}_3\text{NH}_2 \rightarrow \text{SiH}_2(\text{NH}_2)_2 + \text{H}_2$                            | 0.0                    | 0.32                       | 2.01                          | -0.26                      | -0.43                  |
| $\text{NH}_3 + \text{SiH}_2(\text{NH}_2)_2 \rightarrow \text{SiH}(\text{NH}_2)_3 + \text{H}_2$                          | 0.0                    | 0.48                       | 2.30                          | -0.36                      | -0.50                  |
| $\text{NH}_3 + \text{SiH}(\text{NH}_2)_3 \rightarrow \text{Si}(\text{NH}_2)_4 + \text{H}_2$                             | 0.0                    | 0.34                       | 2.31                          | -0.31                      | -0.52                  |
| $\text{SiH}_4 + \text{NH}_2\text{SiH}_3 \rightarrow (\text{SiH}_3)_2\text{NH} + \text{H}_2$                             | 0.0                    | 0.31                       | 2.29                          | -0.25                      | -0.44                  |
| $\text{SiH}_4 + (\text{SiH}_3)_2\text{NH} \rightarrow (\text{SiH}_3)_3\text{N} + \text{H}_2$                            | 0.0                    | 0.37                       | 2.34                          | -0.24                      | -0.38                  |
| $\text{SiH}_3\text{NH}_2 + (\text{NH}_2)_3\text{SiH} \rightarrow \text{SiH}_3\text{-NH-Si}(\text{NH}_2)_3 + \text{H}_2$ | 0.0                    | 0.33                       | 2.39                          | -0.37                      | -0.54                  |
| $\text{SiH}_3\text{NH}_2 \rightarrow \text{SiHNH}_2 + \text{H}_2$                                                       | 0.0                    | -                          | 2.59                          | 1.45                       | 1.27                   |
| $\text{SiH}_2(\text{NH}_2)_2 \rightarrow \text{Si}(\text{NH}_2)_2 + \text{H}_2$                                         | 0.0                    | -                          | 3.03                          | 1.06                       | 0.90                   |
| $\text{NH}_2 + \text{SiH}_3 \rightarrow \text{SiH}_3\text{NH}_2$                                                        | 0.0                    | -                          | -                             | -                          | -3.97                  |
| $\text{NH}_2 + \text{SiH}_2\text{NH}_2 \rightarrow \text{SiH}_2(\text{NH}_2)_2$                                         | 0.0                    | -                          | -                             | -                          | -4.22                  |
| $\text{NH}_2 + \text{SiH}(\text{NH}_2)_2 \rightarrow \text{SiH}(\text{NH}_2)_3$                                         | 0.0                    | -                          | -                             | -                          | -4.37                  |
| $\text{NH}_2 + \text{Si}(\text{NH}_2)_3 \rightarrow \text{Si}(\text{NH}_2)_4$                                           | 0.0                    | -                          | -                             | -                          | -4.44                  |
| $\text{SiH}_3 + \text{SiH}_3\text{NH} \rightarrow (\text{SiH}_3)_2\text{NH}$                                            | 0.0                    | -                          | -                             | -                          | -4.28                  |
| $\text{SiH}_3 + (\text{SiH}_3)_2\text{N} \rightarrow (\text{SiH}_3)_3\text{N}$                                          | 0.0                    | -                          | -                             | -                          | -4.94                  |
| $\text{SiH}_3 + \text{NH}_3 \rightarrow \text{SiH}_3\text{NH}_3$                                                        | 0.0                    | 0.32                       | 0.55                          | -                          | 1.03                   |
| $\text{NH}_2\text{SiH}_2 + \text{NH}_3 \rightarrow \text{NH}_2\text{SiH}_2\text{NH}_3$                                  | 0.0                    | 0.35                       | 1.03                          | -                          | 0.91                   |
| $(\text{NH}_2)_2\text{SiH} + \text{NH}_3 \rightarrow (\text{NH}_2)_2\text{SiHNH}_3$                                     | 0.0                    | 0.24                       | 1.05                          | -                          | 0.76                   |
| $\text{NH}_3\text{SiH}_3 \rightarrow \text{NH}_2\text{SiH}_3 + \text{H}$                                                | 0.0                    | -                          | 0.27                          | -0.39                      | -0.77                  |
| $\text{NH}_2\text{SiH}_2\text{NH}_3 \rightarrow (\text{NH}_2)_2\text{SiH}_2 + \text{H}$                                 | 0.0                    | -                          | 0.21                          | -0.56                      | -0.91                  |
| $(\text{NH}_2)_2\text{SiHNH}_3 \rightarrow (\text{NH}_2)_3\text{SiH} + \text{H}$                                        | 0.0                    | -                          | 0.12                          | -0.58                      | -0.97                  |
| $(\text{NH}_2)_3\text{SiNH}_3 \rightarrow (\text{NH}_2)_4\text{Si} + \text{H}$                                          | 0.0                    | -                          | 0.14                          | -0.53                      | -0.83                  |
| $\text{SiH}_2 + \text{NH}_3 \rightarrow \text{SiH}_2\text{-NH}_3$                                                       | 0.0                    | -                          | -                             | -                          | -0.62                  |
| $\text{SiH}_2 + \text{NH}_2\text{SiH}_3 \rightarrow \text{SiH}_2\text{-NH}_2\text{SiH}_3$                               | 0.0                    | -                          | -                             | -                          | -0.51                  |
| $\text{SiH}_2 + \text{NH}(\text{SiH}_3)_2 \rightarrow \text{SiH}_2\text{-NH}(\text{SiH}_3)_2$                           | 0.0                    | -                          | -                             | -                          | -0.40                  |
| $\text{SiH}_2\text{-NH}_3 + \text{NH}_3 \rightarrow \text{NH}_3\text{-SiH}_2\text{-NH}_3$                               | 0.0                    | 0.37                       | -                             | -                          | 0.36                   |
| $\text{SiH}_2\text{-NH}_3 \rightarrow \text{SiH}_3\text{NH}_2$                                                          | 0.0                    | -                          | 1.44                          | -                          | -1.75                  |
| $\text{SiH}_2\text{-NH}_2\text{SiH}_3 \rightarrow \text{NH}(\text{SiH}_3)_2$                                            | 0.0                    | -                          | 1.22                          | -                          | -1.93                  |
| $\text{SiH}_2\text{-NH}(\text{SiH}_3)_2 \rightarrow \text{N}(\text{SiH}_3)_3$                                           | 0.0                    | -                          | 1.05                          | -                          | -2.04                  |
| $\text{NH}_2 + \text{SiH}_4 \rightarrow \text{NH}_2\text{SiH}_3 + \text{H}$                                             | 0.0                    | 0.31                       | 0.77                          | -0.15                      | -0.49                  |
| $\text{NH}_2 + \text{NH}_2\text{SiH}_3 \rightarrow (\text{NH}_2)_2\text{SiH}_2 + \text{H}$                              | 0.0                    | 0.25                       | 0.59                          | -0.30                      | -0.63                  |
| $\text{NH}_2 + (\text{NH}_2)_2\text{SiH}_2 \rightarrow (\text{NH}_2)_3\text{SiH} + \text{H}$                            | 0.0                    | 0.26                       | 0.51                          | -0.42                      | -0.82                  |
| $\text{NH}_2 + (\text{NH}_2)_3\text{SiH} \rightarrow (\text{NH}_2)_4\text{Si} + \text{H}$                               | 0.0                    | 0.38                       | 0.65                          | -0.44                      | -0.77                  |
| $\text{SiH}_3 + \text{SiH}_4 \rightarrow \text{SiH}_4 + \text{SiH}_3$                                                   | 0.0                    | 0.44                       | 0.72                          | 0.44                       | 0.02                   |
| $\text{SiH}_3 + \text{NH}_2\text{SiH}_3 \rightarrow \text{NH}_2\text{SiH}_2 + \text{SiH}_4$                             | 0.0                    | 0.32                       | 0.75                          | 0.30                       | 0.03                   |
| $\text{SiH}_3 + (\text{NH}_2)_2\text{SiH}_2 \rightarrow (\text{NH}_2)_2\text{SiH} + \text{SiH}_4$                       | 0.0                    | 0.32                       | 0.78                          | 0.40                       | 0.07                   |
| $\text{SiH}_3 + (\text{NH}_2)_3\text{SiH} \rightarrow (\text{NH}_2)_3\text{Si} + \text{SiH}_4$                          | 0.0                    | 0.36                       | 0.98                          | 0.58                       | 0.19                   |
| $\text{NH}_2 + \text{SiH}_4 \rightarrow \text{SiH}_3 + \text{NH}_3$                                                     | 0.0                    | 0.29                       | 0.66                          | -0.37                      | -0.66                  |
| $\text{NH}_2 + \text{NH}_2\text{SiH}_3 \rightarrow \text{NH}_2\text{SiH}_2 + \text{NH}_3$                               | 0.0                    | 0.42                       | 0.73                          | -0.41                      | -0.65                  |
| $\text{NH}_2 + (\text{NH}_2)_2\text{SiH}_2 \rightarrow (\text{NH}_2)_2\text{SiH} + \text{NH}_3$                         | 0.0                    | 0.29                       | 0.71                          | -0.31                      | -0.56                  |
| $\text{NH}_2 + (\text{NH}_2)_3\text{SiH} \rightarrow (\text{NH}_2)_3\text{Si} + \text{NH}_3$                            | 0.0                    | 0.38                       | 0.67                          | -0.10                      | -0.45                  |
| $\text{SiH}_4 + \text{H} \rightarrow \text{SiH}_3 + \text{H}_2$                                                         | 0.0                    | 0.32                       | 0.58                          | -0.21                      | -0.38                  |
| $\text{NH}_2\text{SiH}_3 + \text{H} \rightarrow \text{NH}_2\text{SiH}_2 + \text{H}_2$                                   | 0.0                    | 0.37                       | 0.52                          | -0.15                      | -0.34                  |
| $(\text{NH}_2)_2\text{SiH}_2 + \text{H} \rightarrow (\text{NH}_2)_2\text{SiH} + \text{H}_2$                             | 0.0                    | 0.37                       | 0.60                          | -0.07                      | -0.29                  |
| $(\text{NH}_2)_3\text{SiH} + \text{H} \rightarrow (\text{NH}_2)_3\text{Si} + \text{H}_2$                                | 0.0                    | 0.38                       | 0.59                          | 0.06                       | -0.17                  |

Table 20: Relative Gibbs free energies of reactants ( $\Delta G_r$ ), pre-reaction complexes( $\Delta G_{pk1}$ ), transition states ( $\Delta G^\ddagger$ ), post-reaction complexes ( $\Delta G_{pk2}$ ) and products ( $\Delta G_p$ ) for reactions in silane-ammonia plasma at 300 K and 400 Pa. All Gibbs free energies are calculated with MP2/aug-cc-pVTZ//CASPT2/aug-cc-pVTZ method and vibrational contribution to entropy is calculated with MP2/aug-cc-pVTZ. Entropy of hydrogen molecule is taken from NIST-JANAF thermochemical tables.<sup>1</sup> Relative Gibbs free energies are shown relative to reactants.

| reaction                                                                                                                | $\Delta G_r/\text{eV}$ | $\Delta G_{pk1}/\text{eV}$ | $\Delta G^\ddagger/\text{eV}$ | $\Delta G_{pk2}/\text{eV}$ | $\Delta G_p/\text{eV}$ |
|-------------------------------------------------------------------------------------------------------------------------|------------------------|----------------------------|-------------------------------|----------------------------|------------------------|
| $\text{NH}_3 + \text{SiH}_4 \rightarrow \text{SiH}_3\text{NH}_2 + \text{H}_2$                                           | 0.0                    | 0.27                       | 2.29                          | -0.12                      | -0.30                  |
| $\text{NH}_3 + \text{SiH}_3\text{NH}_2 \rightarrow \text{SiH}_2(\text{NH}_2)_2 + \text{H}_2$                            | 0.0                    | 0.31                       | 2.00                          | -0.27                      | -0.44                  |
| $\text{NH}_3 + \text{SiH}_2(\text{NH}_2)_2 \rightarrow \text{SiH}(\text{NH}_2)_3 + \text{H}_2$                          | 0.0                    | 0.25                       | 2.29                          | -0.37                      | -0.50                  |
| $\text{NH}_3 + \text{SiH}(\text{NH}_2)_3 \rightarrow \text{Si}(\text{NH}_2)_4 + \text{H}_2$                             | 0.0                    | 0.33                       | 2.30                          | -0.32                      | -0.52                  |
| $\text{SiH}_4 + \text{NH}_2\text{SiH}_3 \rightarrow (\text{SiH}_3)_2\text{NH} + \text{H}_2$                             | 0.0                    | 0.30                       | 2.28                          | -0.26                      | -0.45                  |
| $\text{SiH}_4 + (\text{SiH}_3)_2\text{NH} \rightarrow (\text{SiH}_3)_3\text{N} + \text{H}_2$                            | 0.0                    | 0.36                       | 2.33                          | -0.25                      | -0.39                  |
| $\text{SiH}_3\text{NH}_2 + (\text{NH}_2)_3\text{SiH} \rightarrow \text{SiH}_3\text{-NH-Si}(\text{NH}_2)_3 + \text{H}_2$ | 0.0                    | 0.32                       | 2.39                          | -0.38                      | -0.55                  |
| $\text{SiH}_3\text{NH}_2 \rightarrow \text{SiHNH}_2 + \text{H}_2$                                                       | 0.0                    | -                          | 2.59                          | 1.45                       | 1.27                   |
| $\text{SiH}_2(\text{NH}_2)_2 \rightarrow \text{Si}(\text{NH}_2)_2 + \text{H}_2$                                         | 0.0                    | -                          | 3.03                          | 1.06                       | 0.90                   |
| $\text{NH}_2 + \text{SiH}_3 \rightarrow \text{SiH}_3\text{NH}_2$                                                        | 0.0                    | -                          | -                             | -                          | -3.98                  |
| $\text{NH}_2 + \text{SiH}_2\text{NH}_2 \rightarrow \text{SiH}_2(\text{NH}_2)_2$                                         | 0.0                    | -                          | -                             | -                          | -4.22                  |
| $\text{NH}_2 + \text{SiH}(\text{NH}_2)_2 \rightarrow \text{SiH}(\text{NH}_2)_3$                                         | 0.0                    | -                          | -                             | -                          | -4.38                  |
| $\text{NH}_2 + \text{Si}(\text{NH}_2)_3 \rightarrow \text{Si}(\text{NH}_2)_4$                                           | 0.0                    | -                          | -                             | -                          | -4.44                  |
| $\text{SiH}_3 + \text{SiH}_3\text{NH} \rightarrow (\text{SiH}_3)_2\text{NH}$                                            | 0.0                    | -                          | -                             | -                          | -4.29                  |
| $\text{SiH}_3 + (\text{SiH}_3)_2\text{N} \rightarrow (\text{SiH}_3)_3\text{N}$                                          | 0.0                    | -                          | -                             | -                          | -4.95                  |
| $\text{SiH}_3 + \text{NH}_3 \rightarrow \text{SiH}_3\text{NH}_3$                                                        | 0.0                    | 0.31                       | 0.54                          | -                          | 1.02                   |
| $\text{NH}_2\text{SiH}_2 + \text{NH}_3 \rightarrow \text{NH}_2\text{SiH}_2\text{NH}_3$                                  | 0.0                    | 0.34                       | 1.02                          | -                          | 0.90                   |
| $(\text{NH}_2)_2\text{SiH} + \text{NH}_3 \rightarrow (\text{NH}_2)_2\text{SiHNH}_3$                                     | 0.0                    | 0.24                       | 1.05                          | -                          | 0.75                   |
| $\text{NH}_3\text{SiH}_3 \rightarrow \text{NH}_2\text{SiH}_3 + \text{H}$                                                | 0.0                    | -                          | 0.27                          | -0.39                      | -0.76                  |
| $\text{NH}_2\text{SiH}_2\text{NH}_3 \rightarrow (\text{NH}_2)_2\text{SiH}_2 + \text{H}$                                 | 0.0                    | -                          | 0.21                          | -0.56                      | -0.90                  |
| $(\text{NH}_2)_2\text{SiHNH}_3 \rightarrow (\text{NH}_2)_3\text{SiH} + \text{H}$                                        | 0.0                    | -                          | 0.12                          | -0.58                      | -0.96                  |
| $(\text{NH}_2)_3\text{SiNH}_3 \rightarrow (\text{NH}_2)_4\text{Si} + \text{H}$                                          | 0.0                    | -                          | 0.14                          | -0.53                      | -0.82                  |
| $\text{SiH}_2 + \text{NH}_3 \rightarrow \text{SiH}_2\text{-NH}_3$                                                       | 0.0                    | -                          | -                             | -                          | -0.63                  |
| $\text{SiH}_2 + \text{NH}_2\text{SiH}_3 \rightarrow \text{SiH}_2\text{-NH}_2\text{SiH}_3$                               | 0.0                    | -                          | -                             | -                          | -0.51                  |
| $\text{SiH}_2 + \text{NH}(\text{SiH}_3)_2 \rightarrow \text{SiH}_2\text{-NH}(\text{SiH}_3)_2$                           | 0.0                    | -                          | -                             | -                          | -0.41                  |
| $\text{SiH}_2\text{-NH}_3 + \text{NH}_3 \rightarrow \text{NH}_3\text{-SiH}_2\text{-NH}_3$                               | 0.0                    | 0.36                       | -                             | -                          | 0.35                   |
| $\text{SiH}_2\text{-NH}_3 \rightarrow \text{SiH}_3\text{NH}_2$                                                          | 0.0                    | -                          | 1.44                          | -                          | -1.75                  |
| $\text{SiH}_2\text{-NH}_2\text{SiH}_3 \rightarrow \text{NH}(\text{SiH}_3)_2$                                            | 0.0                    | -                          | 1.22                          | -                          | -1.93                  |
| $\text{SiH}_2\text{-NH}(\text{SiH}_3)_2 \rightarrow \text{N}(\text{SiH}_3)_3$                                           | 0.0                    | -                          | 1.05                          | -                          | -2.04                  |
| $\text{NH}_2 + \text{SiH}_4 \rightarrow \text{NH}_2\text{SiH}_3 + \text{H}$                                             | 0.0                    | 0.30                       | 0.76                          | -0.16                      | -0.49                  |
| $\text{NH}_2 + \text{NH}_2\text{SiH}_3 \rightarrow (\text{NH}_2)_2\text{SiH}_2 + \text{H}$                              | 0.0                    | 0.25                       | 0.58                          | -0.31                      | -0.63                  |
| $\text{NH}_2 + (\text{NH}_2)_2\text{SiH}_2 \rightarrow (\text{NH}_2)_3\text{SiH} + \text{H}$                            | 0.0                    | 0.25                       | 0.50                          | -0.42                      | -0.82                  |
| $\text{NH}_2 + (\text{NH}_2)_3\text{SiH} \rightarrow (\text{NH}_2)_4\text{Si} + \text{H}$                               | 0.0                    | 0.38                       | 0.65                          | -0.44                      | -0.77                  |
| $\text{SiH}_3 + \text{SiH}_4 \rightarrow \text{SiH}_4 + \text{SiH}_3$                                                   | 0.0                    | 0.43                       | 0.72                          | 0.43                       | 0.02                   |
| $\text{SiH}_3 + \text{NH}_2\text{SiH}_3 \rightarrow \text{NH}_2\text{SiH}_2 + \text{SiH}_4$                             | 0.0                    | 0.31                       | 0.74                          | 0.29                       | 0.03                   |
| $\text{SiH}_3 + (\text{NH}_2)_2\text{SiH}_2 \rightarrow (\text{NH}_2)_2\text{SiH} + \text{SiH}_4$                       | 0.0                    | 0.31                       | 0.78                          | 0.40                       | 0.07                   |
| $\text{SiH}_3 + (\text{NH}_2)_3\text{SiH} \rightarrow (\text{NH}_2)_3\text{Si} + \text{SiH}_4$                          | 0.0                    | 0.35                       | 0.98                          | 0.58                       | 0.19                   |
| $\text{NH}_2 + \text{SiH}_4 \rightarrow \text{SiH}_3 + \text{NH}_3$                                                     | 0.0                    | 0.29                       | 0.65                          | -0.38                      | -0.66                  |
| $\text{NH}_2 + \text{NH}_2\text{SiH}_3 \rightarrow \text{NH}_2\text{SiH}_2 + \text{NH}_3$                               | 0.0                    | 0.41                       | 0.72                          | -0.42                      | -0.65                  |
| $\text{NH}_2 + (\text{NH}_2)_2\text{SiH}_2 \rightarrow (\text{NH}_2)_2\text{SiH} + \text{NH}_3$                         | 0.0                    | 0.28                       | 0.70                          | -0.31                      | -0.56                  |
| $\text{NH}_2 + (\text{NH}_2)_3\text{SiH} \rightarrow (\text{NH}_2)_3\text{Si} + \text{NH}_3$                            | 0.0                    | 0.38                       | 0.66                          | -0.10                      | -0.45                  |
| $\text{SiH}_4 + \text{H} \rightarrow \text{SiH}_3 + \text{H}_2$                                                         | 0.0                    | 0.31                       | 0.57                          | -0.21                      | -0.39                  |
| $\text{NH}_2\text{SiH}_3 + \text{H} \rightarrow \text{NH}_2\text{SiH}_2 + \text{H}_2$                                   | 0.0                    | 0.37                       | 0.51                          | -0.15                      | -0.35                  |
| $(\text{NH}_2)_2\text{SiH}_2 + \text{H} \rightarrow (\text{NH}_2)_2\text{SiH} + \text{H}_2$                             | 0.0                    | 0.36                       | 0.59                          | -0.08                      | -0.30                  |
| $(\text{NH}_2)_3\text{SiH} + \text{H} \rightarrow (\text{NH}_2)_3\text{Si} + \text{H}_2$                                | 0.0                    | 0.37                       | 0.58                          | 0.05                       | -0.18                  |

Table 21: Relative Gibbs free energies of reactants ( $\Delta G_r$ ), pre-reaction complexes( $\Delta G_{pk1}$ ), transition states ( $\Delta G^\ddagger$ ), post-reaction complexes ( $\Delta G_{pk2}$ ) and products ( $\Delta G_p$ ) for reactions in silane-ammonia plasma at 300 K and 500 Pa. All Gibbs free energies are calculated with MP2/aug-cc-pVTZ//CASPT2/aug-cc-pVTZ method and vibrational contribution to entropy is calculated with MP2/aug-cc-pVTZ. Entropy of hydrogen molecule is taken from NIST-JANAF thermochemical tables.<sup>1</sup> Relative Gibbs free energies are shown relative to reactants.

| reaction                                                                                                                    | $\Delta G_r/\text{eV}$ | $\Delta G_{pk1}/\text{eV}$ | $\Delta G^\ddagger/\text{eV}$ | $\Delta G_{pk2}/\text{eV}$ | $\Delta G_p/\text{eV}$ |
|-----------------------------------------------------------------------------------------------------------------------------|------------------------|----------------------------|-------------------------------|----------------------------|------------------------|
| $\text{NH}_3 + \text{SiH}_4 \longrightarrow \text{SiH}_3\text{NH}_2 + \text{H}_2$                                           | 0.0                    | 0.26                       | 2.28                          | -0.13                      | -0.31                  |
| $\text{NH}_3 + \text{SiH}_3\text{NH}_2 \longrightarrow \text{SiH}_2(\text{NH}_2)_2 + \text{H}_2$                            | 0.0                    | 0.31                       | 1.99                          | -0.27                      | -0.44                  |
| $\text{NH}_3 + \text{SiH}_2(\text{NH}_2)_2 \longrightarrow \text{SiH}(\text{NH}_2)_3 + \text{H}_2$                          | 0.0                    | 0.24                       | 2.29                          | -0.37                      | -0.51                  |
| $\text{NH}_3 + \text{SiH}(\text{NH}_2)_3 \longrightarrow \text{Si}(\text{NH}_2)_4 + \text{H}_2$                             | 0.0                    | 0.33                       | 2.29                          | -0.33                      | -0.53                  |
| $\text{SiH}_4 + \text{NH}_2\text{SiH}_3 \longrightarrow (\text{SiH}_3)_2\text{NH} + \text{H}_2$                             | 0.0                    | 0.30                       | 2.27                          | -0.27                      | -0.45                  |
| $\text{SiH}_4 + (\text{SiH}_3)_2\text{NH} \longrightarrow (\text{SiH}_3)_3\text{N} + \text{H}_2$                            | 0.0                    | 0.36                       | 2.32                          | -0.26                      | -0.39                  |
| $\text{SiH}_3\text{NH}_2 + (\text{NH}_2)_3\text{SiH} \longrightarrow \text{SiH}_3\text{-NH-Si}(\text{NH}_2)_3 + \text{H}_2$ | 0.0                    | 0.31                       | 2.38                          | -0.38                      | -0.56                  |
| $\text{SiH}_3\text{NH}_2 \longrightarrow \text{SiHNH}_2 + \text{H}_2$                                                       | 0.0                    | -                          | 2.59                          | 1.45                       | 1.27                   |
| $\text{SiH}_2(\text{NH}_2)_2 \longrightarrow \text{Si}(\text{NH}_2)_2 + \text{H}_2$                                         | 0.0                    | -                          | 3.03                          | 1.06                       | 0.90                   |
| $\text{NH}_2 + \text{SiH}_3 \longrightarrow \text{SiH}_3\text{NH}_2$                                                        | 0.0                    | -                          | -                             | -                          | -3.99                  |
| $\text{NH}_2 + \text{SiH}_2\text{NH}_2 \longrightarrow \text{SiH}_2(\text{NH}_2)_2$                                         | 0.0                    | -                          | -                             | -                          | -4.23                  |
| $\text{NH}_2 + \text{SiH}(\text{NH}_2)_2 \longrightarrow \text{SiH}(\text{NH}_2)_3$                                         | 0.0                    | -                          | -                             | -                          | -4.38                  |
| $\text{NH}_2 + \text{Si}(\text{NH}_2)_3 \longrightarrow \text{Si}(\text{NH}_2)_4$                                           | 0.0                    | -                          | -                             | -                          | -4.45                  |
| $\text{SiH}_3 + \text{SiH}_3\text{NH} \longrightarrow (\text{SiH}_3)_2\text{NH}$                                            | 0.0                    | -                          | -                             | -                          | -4.29                  |
| $\text{SiH}_3 + (\text{SiH}_3)_2\text{N} \longrightarrow (\text{SiH}_3)_3\text{N}$                                          | 0.0                    | -                          | -                             | -                          | -4.96                  |
| $\text{SiH}_3 + \text{NH}_3 \longrightarrow \text{SiH}_3\text{NH}_3$                                                        | 0.0                    | 0.31                       | 0.53                          | -                          | 1.02                   |
| $\text{NH}_2\text{SiH}_2 + \text{NH}_3 \longrightarrow \text{NH}_2\text{SiH}_2\text{NH}_3$                                  | 0.0                    | 0.33                       | 1.02                          | -                          | 0.89                   |
| $(\text{NH}_2)_2\text{SiH} + \text{NH}_3 \longrightarrow (\text{NH}_2)_2\text{SiHNH}_3$                                     | 0.0                    | 0.23                       | 1.04                          | -                          | 0.75                   |
| $\text{NH}_3\text{SiH}_3 \longrightarrow \text{NH}_2\text{SiH}_3 + \text{H}$                                                | 0.0                    | -                          | 0.27                          | -0.39                      | -0.75                  |
| $\text{NH}_2\text{SiH}_2\text{NH}_3 \longrightarrow (\text{NH}_2)_2\text{SiH}_2 + \text{H}$                                 | 0.0                    | -                          | 0.21                          | -0.56                      | -0.90                  |
| $(\text{NH}_2)_2\text{SiHNH}_3 \longrightarrow (\text{NH}_2)_3\text{SiH} + \text{H}$                                        | 0.0                    | -                          | 0.12                          | -0.58                      | -0.95                  |
| $(\text{NH}_2)_3\text{SiNH}_3 \longrightarrow (\text{NH}_2)_4\text{Si} + \text{H}$                                          | 0.0                    | -                          | 0.14                          | -0.53                      | -0.82                  |
| $\text{SiH}_2 + \text{NH}_3 \longrightarrow \text{SiH}_2\text{-NH}_3$                                                       | 0.0                    | -                          | -                             | -                          | -0.63                  |
| $\text{SiH}_2 + \text{NH}_2\text{SiH}_3 \longrightarrow \text{SiH}_2\text{-NH}_2\text{SiH}_3$                               | 0.0                    | -                          | -                             | -                          | -0.52                  |
| $\text{SiH}_2 + \text{NH}(\text{SiH}_3)_2 \longrightarrow \text{SiH}_2\text{-NH}(\text{SiH}_3)_2$                           | 0.0                    | -                          | -                             | -                          | -0.41                  |
| $\text{SiH}_2\text{-NH}_3 + \text{NH}_3 \longrightarrow \text{NH}_3\text{-SiH}_2\text{-NH}_3$                               | 0.0                    | 0.35                       | -                             | -                          | 0.35                   |
| $\text{SiH}_2\text{-NH}_3 \longrightarrow \text{SiH}_3\text{NH}_2$                                                          | 0.0                    | -                          | 1.44                          | -                          | -1.75                  |
| $\text{SiH}_2\text{-NH}_2\text{SiH}_3 \longrightarrow \text{NH}(\text{SiH}_3)_2$                                            | 0.0                    | -                          | 1.22                          | -                          | -1.93                  |
| $\text{SiH}_2\text{-NH}(\text{SiH}_3)_2 \longrightarrow \text{N}(\text{SiH}_3)_3$                                           | 0.0                    | -                          | 1.05                          | -                          | -2.04                  |
| $\text{NH}_2 + \text{SiH}_4 \longrightarrow \text{NH}_2\text{SiH}_3 + \text{H}$                                             | 0.0                    | 0.30                       | 0.75                          | -0.17                      | -0.49                  |
| $\text{NH}_2 + \text{NH}_2\text{SiH}_3 \longrightarrow (\text{NH}_2)_2\text{SiH}_2 + \text{H}$                              | 0.0                    | 0.24                       | 0.58                          | -0.31                      | -0.63                  |
| $\text{NH}_2 + (\text{NH}_2)_2\text{SiH}_2 \longrightarrow (\text{NH}_2)_3\text{SiH} + \text{H}$                            | 0.0                    | 0.24                       | 0.50                          | -0.43                      | -0.82                  |
| $\text{NH}_2 + (\text{NH}_2)_3\text{SiH} \longrightarrow (\text{NH}_2)_4\text{Si} + \text{H}$                               | 0.0                    | 0.37                       | 0.64                          | -0.45                      | -0.77                  |
| $\text{SiH}_3 + \text{SiH}_4 \longrightarrow \text{SiH}_4 + \text{SiH}_3$                                                   | 0.0                    | 0.43                       | 0.71                          | 0.43                       | 0.02                   |
| $\text{SiH}_3 + \text{NH}_2\text{SiH}_3 \longrightarrow \text{NH}_2\text{SiH}_2 + \text{SiH}_4$                             | 0.0                    | 0.30                       | 0.74                          | 0.29                       | 0.03                   |
| $\text{SiH}_3 + (\text{NH}_2)_2\text{SiH}_2 \longrightarrow (\text{NH}_2)_2\text{SiH} + \text{SiH}_4$                       | 0.0                    | 0.31                       | 0.77                          | 0.39                       | 0.07                   |
| $\text{SiH}_3 + (\text{NH}_2)_3\text{SiH} \longrightarrow (\text{NH}_2)_3\text{Si} + \text{SiH}_4$                          | 0.0                    | 0.35                       | 0.97                          | 0.57                       | 0.19                   |
| $\text{NH}_2 + \text{SiH}_4 \longrightarrow \text{SiH}_3 + \text{NH}_3$                                                     | 0.0                    | 0.28                       | 0.64                          | -0.39                      | -0.66                  |
| $\text{NH}_2 + \text{NH}_2\text{SiH}_3 \longrightarrow \text{NH}_2\text{SiH}_2 + \text{NH}_3$                               | 0.0                    | 0.40                       | 0.72                          | -0.42                      | -0.65                  |
| $\text{NH}_2 + (\text{NH}_2)_2\text{SiH}_2 \longrightarrow (\text{NH}_2)_2\text{SiH} + \text{NH}_3$                         | 0.0                    | 0.28                       | 0.69                          | -0.32                      | -0.56                  |
| $\text{NH}_2 + (\text{NH}_2)_3\text{SiH} \longrightarrow (\text{NH}_2)_3\text{Si} + \text{NH}_3$                            | 0.0                    | 0.37                       | 0.66                          | -0.11                      | -0.45                  |
| $\text{SiH}_4 + \text{H} \longrightarrow \text{SiH}_3 + \text{H}_2$                                                         | 0.0                    | 0.31                       | 0.56                          | -0.22                      | -0.39                  |
| $\text{NH}_2\text{SiH}_3 + \text{H} \longrightarrow \text{NH}_2\text{SiH}_2 + \text{H}_2$                                   | 0.0                    | 0.36                       | 0.51                          | -0.16                      | -0.35                  |
| $(\text{NH}_2)_2\text{SiH}_2 + \text{H} \longrightarrow (\text{NH}_2)_2\text{SiH} + \text{H}_2$                             | 0.0                    | 0.35                       | 0.59                          | -0.08                      | -0.31                  |
| $(\text{NH}_2)_3\text{SiH} + \text{H} \longrightarrow (\text{NH}_2)_3\text{Si} + \text{H}_2$                                | 0.0                    | 0.37                       | 0.58                          | 0.04                       | -0.18                  |

Table 22: Relative Gibbs free energies of reactants ( $\Delta G_r$ ), pre-reaction complexes( $\Delta G_{pk1}$ ), transition states ( $\Delta G^\ddagger$ ), post-reaction complexes ( $\Delta G_{pk2}$ ) and products ( $\Delta G_p$ ) for reactions in silane-ammonia plasma at 350 K and 50 Pa. All Gibbs free energies are calculated with MP2/aug-cc-pVTZ//CASPT2/aug-cc-pVTZ method and vibrational contribution to entropy is calculated with MP2/aug-cc-pVTZ. Entropy of hydrogen molecule is taken from NIST-JANAF thermochemical tables.<sup>1</sup> Relative Gibbs free energies are shown relative to reactants.

| reaction                                                                                                                | $\Delta G_r/\text{eV}$ | $\Delta G_{pk1}/\text{eV}$ | $\Delta G^\ddagger/\text{eV}$ | $\Delta G_{pk2}/\text{eV}$ | $\Delta G_p/\text{eV}$ |
|-------------------------------------------------------------------------------------------------------------------------|------------------------|----------------------------|-------------------------------|----------------------------|------------------------|
| $\text{NH}_3 + \text{SiH}_4 \rightarrow \text{SiH}_3\text{NH}_2 + \text{H}_2$                                           | 0.0                    | 0.37                       | 2.44                          | -0.00                      | -0.21                  |
| $\text{NH}_3 + \text{SiH}_3\text{NH}_2 \rightarrow \text{SiH}_2(\text{NH}_2)_2 + \text{H}_2$                            | 0.0                    | 0.44                       | 2.17                          | -0.13                      | -0.33                  |
| $\text{NH}_3 + \text{SiH}_2(\text{NH}_2)_2 \rightarrow \text{SiH}(\text{NH}_2)_3 + \text{H}_2$                          | 0.0                    | 0.38                       | 2.46                          | -0.24                      | -0.40                  |
| $\text{NH}_3 + \text{SiH}(\text{NH}_2)_3 \rightarrow \text{Si}(\text{NH}_2)_4 + \text{H}_2$                             | 0.0                    | 0.47                       | 2.47                          | -0.17                      | -0.42                  |
| $\text{SiH}_4 + \text{NH}_2\text{SiH}_3 \rightarrow (\text{SiH}_3)_2\text{NH} + \text{H}_2$                             | 0.0                    | 0.43                       | 2.44                          | -0.14                      | -0.36                  |
| $\text{SiH}_4 + (\text{SiH}_3)_2\text{NH} \rightarrow (\text{SiH}_3)_3\text{N} + \text{H}_2$                            | 0.0                    | 0.51                       | 2.50                          | -0.11                      | -0.27                  |
| $\text{SiH}_3\text{NH}_2 + (\text{NH}_2)_3\text{SiH} \rightarrow \text{SiH}_3\text{-NH-Si}(\text{NH}_2)_3 + \text{H}_2$ | 0.0                    | 0.47                       | 2.57                          | -0.23                      | -0.43                  |
| $\text{SiH}_3\text{NH}_2 \rightarrow \text{SiHNH}_2 + \text{H}_2$                                                       | 0.0                    | -                          | 2.59                          | 1.42                       | 1.21                   |
| $\text{SiH}_2(\text{NH}_2)_2 \rightarrow \text{Si}(\text{NH}_2)_2 + \text{H}_2$                                         | 0.0                    | -                          | 3.03                          | 1.03                       | 0.84                   |
| $\text{NH}_2 + \text{SiH}_3 \rightarrow \text{SiH}_3\text{NH}_2$                                                        | 0.0                    | -                          | -                             | -                          | -3.82                  |
| $\text{NH}_2 + \text{SiH}_2\text{NH}_2 \rightarrow \text{SiH}_2(\text{NH}_2)_2$                                         | 0.0                    | -                          | -                             | -                          | -4.05                  |
| $\text{NH}_2 + \text{SiH}(\text{NH}_2)_2 \rightarrow \text{SiH}(\text{NH}_2)_3$                                         | 0.0                    | -                          | -                             | -                          | -4.20                  |
| $\text{NH}_2 + \text{Si}(\text{NH}_2)_3 \rightarrow \text{Si}(\text{NH}_2)_4$                                           | 0.0                    | -                          | -                             | -                          | -4.26                  |
| $\text{SiH}_3 + \text{SiH}_3\text{NH} \rightarrow (\text{SiH}_3)_2\text{NH}$                                            | 0.0                    | -                          | -                             | -                          | -4.11                  |
| $\text{SiH}_3 + (\text{SiH}_3)_2\text{N} \rightarrow (\text{SiH}_3)_3\text{N}$                                          | 0.0                    | -                          | -                             | -                          | -4.77                  |
| $\text{SiH}_3 + \text{NH}_3 \rightarrow \text{SiH}_3\text{NH}_3$                                                        | 0.0                    | 0.44                       | 0.69                          | -                          | 1.18                   |
| $\text{NH}_2\text{SiH}_2 + \text{NH}_3 \rightarrow \text{NH}_2\text{SiH}_2\text{NH}_3$                                  | 0.0                    | 0.47                       | 1.19                          | -                          | 1.06                   |
| $(\text{NH}_2)_2\text{SiH} + \text{NH}_3 \rightarrow (\text{NH}_2)_2\text{SiHNH}_3$                                     | 0.0                    | 0.36                       | 1.22                          | -                          | 0.92                   |
| $\text{NH}_3\text{SiH}_3 \rightarrow \text{NH}_2\text{SiH}_3 + \text{H}$                                                | 0.0                    | -                          | 0.27                          | -0.39                      | -0.90                  |
| $\text{NH}_2\text{SiH}_2\text{NH}_3 \rightarrow (\text{NH}_2)_2\text{SiH}_2 + \text{H}$                                 | 0.0                    | -                          | 0.21                          | -0.57                      | -1.04                  |
| $(\text{NH}_2)_2\text{SiHNH}_3 \rightarrow (\text{NH}_2)_3\text{SiH} + \text{H}$                                        | 0.0                    | -                          | 0.13                          | -0.58                      | -1.10                  |
| $(\text{NH}_2)_3\text{SiNH}_3 \rightarrow (\text{NH}_2)_4\text{Si} + \text{H}$                                          | 0.0                    | -                          | 0.15                          | -0.55                      | -0.96                  |
| $\text{SiH}_2 + \text{NH}_3 \rightarrow \text{SiH}_2\text{-NH}_3$                                                       | 0.0                    | -                          | -                             | -                          | -0.47                  |
| $\text{SiH}_2 + \text{NH}_2\text{SiH}_3 \rightarrow \text{SiH}_2\text{-NH}_2\text{SiH}_3$                               | 0.0                    | -                          | -                             | -                          | -0.35                  |
| $\text{SiH}_2 + \text{NH}(\text{SiH}_3)_2 \rightarrow \text{SiH}_2\text{-NH}(\text{SiH}_3)_2$                           | 0.0                    | -                          | -                             | -                          | -0.25                  |
| $\text{SiH}_2\text{-NH}_3 + \text{NH}_3 \rightarrow \text{NH}_3\text{-SiH}_2\text{-NH}_3$                               | 0.0                    | 0.49                       | -                             | -                          | 0.50                   |
| $\text{SiH}_2\text{-NH}_3 \rightarrow \text{SiH}_3\text{NH}_2$                                                          | 0.0                    | -                          | 1.44                          | -                          | -1.75                  |
| $\text{SiH}_2\text{-NH}_2\text{SiH}_3 \rightarrow \text{NH}(\text{SiH}_3)_2$                                            | 0.0                    | -                          | 1.22                          | -                          | -1.93                  |
| $\text{SiH}_2\text{-NH}(\text{SiH}_3)_2 \rightarrow \text{N}(\text{SiH}_3)_3$                                           | 0.0                    | -                          | 1.05                          | -                          | -2.03                  |
| $\text{NH}_2 + \text{SiH}_4 \rightarrow \text{NH}_2\text{SiH}_3 + \text{H}$                                             | 0.0                    | 0.43                       | 0.92                          | -0.03                      | -0.47                  |
| $\text{NH}_2 + \text{NH}_2\text{SiH}_3 \rightarrow (\text{NH}_2)_2\text{SiH}_2 + \text{H}$                              | 0.0                    | 0.37                       | 0.75                          | -0.16                      | -0.61                  |
| $\text{NH}_2 + (\text{NH}_2)_2\text{SiH}_2 \rightarrow (\text{NH}_2)_3\text{SiH} + \text{H}$                            | 0.0                    | 0.40                       | 0.67                          | -0.28                      | -0.80                  |
| $\text{NH}_2 + (\text{NH}_2)_3\text{SiH} \rightarrow (\text{NH}_2)_4\text{Si} + \text{H}$                               | 0.0                    | 0.52                       | 0.82                          | -0.29                      | -0.73                  |
| $\text{SiH}_3 + \text{SiH}_4 \rightarrow \text{SiH}_4 + \text{SiH}_3$                                                   | 0.0                    | 0.59                       | 0.85                          | 0.59                       | 0.02                   |
| $\text{SiH}_3 + \text{NH}_2\text{SiH}_3 \rightarrow \text{NH}_2\text{SiH}_2 + \text{SiH}_4$                             | 0.0                    | 0.43                       | 0.87                          | 0.42                       | 0.04                   |
| $\text{SiH}_3 + (\text{NH}_2)_2\text{SiH}_2 \rightarrow (\text{NH}_2)_2\text{SiH} + \text{SiH}_4$                       | 0.0                    | 0.45                       | 0.91                          | 0.53                       | 0.07                   |
| $\text{SiH}_3 + (\text{NH}_2)_3\text{SiH} \rightarrow (\text{NH}_2)_3\text{Si} + \text{SiH}_4$                          | 0.0                    | 0.49                       | 1.13                          | 0.72                       | 0.20                   |
| $\text{NH}_2 + \text{SiH}_4 \rightarrow \text{SiH}_3 + \text{NH}_3$                                                     | 0.0                    | 0.41                       | 0.79                          | -0.28                      | -0.67                  |
| $\text{NH}_2 + \text{NH}_2\text{SiH}_3 \rightarrow \text{NH}_2\text{SiH}_2 + \text{NH}_3$                               | 0.0                    | 0.54                       | 0.87                          | -0.29                      | -0.65                  |
| $\text{NH}_2 + (\text{NH}_2)_2\text{SiH}_2 \rightarrow (\text{NH}_2)_2\text{SiH} + \text{NH}_3$                         | 0.0                    | 0.41                       | 0.85                          | -0.19                      | -0.57                  |
| $\text{NH}_2 + (\text{NH}_2)_3\text{SiH} \rightarrow (\text{NH}_2)_3\text{Si} + \text{NH}_3$                            | 0.0                    | 0.52                       | 0.80                          | 0.03                       | -0.45                  |
| $\text{SiH}_4 + \text{H} \rightarrow \text{SiH}_3 + \text{H}_2$                                                         | 0.0                    | 0.44                       | 0.69                          | -0.10                      | -0.32                  |
| $\text{NH}_2\text{SiH}_3 + \text{H} \rightarrow \text{NH}_2\text{SiH}_2 + \text{H}_2$                                   | 0.0                    | 0.50                       | 0.64                          | -0.03                      | -0.27                  |
| $(\text{NH}_2)_2\text{SiH}_2 + \text{H} \rightarrow (\text{NH}_2)_2\text{SiH} + \text{H}_2$                             | 0.0                    | 0.49                       | 0.72                          | 0.04                       | -0.23                  |
| $(\text{NH}_2)_3\text{SiH} + \text{H} \rightarrow (\text{NH}_2)_3\text{Si} + \text{H}_2$                                | 0.0                    | 0.51                       | 0.71                          | 0.17                       | -0.10                  |

Table 23: Relative Gibbs free energies of reactants ( $\Delta G_r$ ), pre-reaction complexes( $\Delta G_{pk1}$ ), transition states ( $\Delta G^\ddagger$ ), post-reaction complexes ( $\Delta G_{pk2}$ ) and products ( $\Delta G_p$ ) for reactions in silane-ammonia plasma at 350 K and 100 Pa. All Gibbs free energies are calculated with MP2/aug-cc-pVTZ//CASPT2/aug-cc-pVTZ method and vibrational contribution to entropy is calculated with MP2/aug-cc-pVTZ. Entropy of hydrogen molecule is taken from NIST-JANAF thermochemical tables.<sup>1</sup> Relative Gibbs free energies are shown relative to reactants.

| reaction                                                                                                                | $\Delta G_r/\text{eV}$ | $\Delta G_{pk1}/\text{eV}$ | $\Delta G^\ddagger/\text{eV}$ | $\Delta G_{pk2}/\text{eV}$ | $\Delta G_p/\text{eV}$ |
|-------------------------------------------------------------------------------------------------------------------------|------------------------|----------------------------|-------------------------------|----------------------------|------------------------|
| $\text{NH}_3 + \text{SiH}_4 \rightarrow \text{SiH}_3\text{NH}_2 + \text{H}_2$                                           | 0.0                    | 0.35                       | 2.42                          | -0.03                      | -0.24                  |
| $\text{NH}_3 + \text{SiH}_3\text{NH}_2 \rightarrow \text{SiH}_2(\text{NH}_2)_2 + \text{H}_2$                            | 0.0                    | 0.42                       | 2.15                          | -0.15                      | -0.36                  |
| $\text{NH}_3 + \text{SiH}_2(\text{NH}_2)_2 \rightarrow \text{SiH}(\text{NH}_2)_3 + \text{H}_2$                          | 0.0                    | 0.35                       | 2.44                          | -0.26                      | -0.42                  |
| $\text{NH}_3 + \text{SiH}(\text{NH}_2)_3 \rightarrow \text{Si}(\text{NH}_2)_4 + \text{H}_2$                             | 0.0                    | 0.45                       | 2.45                          | -0.19                      | -0.44                  |
| $\text{SiH}_4 + \text{NH}_2\text{SiH}_3 \rightarrow (\text{SiH}_3)_2\text{NH} + \text{H}_2$                             | 0.0                    | 0.41                       | 2.42                          | -0.16                      | -0.38                  |
| $\text{SiH}_4 + (\text{SiH}_3)_2\text{NH} \rightarrow (\text{SiH}_3)_3\text{N} + \text{H}_2$                            | 0.0                    | 0.49                       | 2.48                          | -0.13                      | -0.29                  |
| $\text{SiH}_3\text{NH}_2 + (\text{NH}_2)_3\text{SiH} \rightarrow \text{SiH}_3\text{-NH-Si}(\text{NH}_2)_3 + \text{H}_2$ | 0.0                    | 0.45                       | 2.55                          | -0.25                      | -0.46                  |
| $\text{SiH}_3\text{NH}_2 \rightarrow \text{SiHNH}_2 + \text{H}_2$                                                       | 0.0                    | -                          | 2.59                          | 1.42                       | 1.21                   |
| $\text{SiH}_2(\text{NH}_2)_2 \rightarrow \text{Si}(\text{NH}_2)_2 + \text{H}_2$                                         | 0.0                    | -                          | 3.03                          | 1.03                       | 0.84                   |
| $\text{NH}_2 + \text{SiH}_3 \rightarrow \text{SiH}_3\text{NH}_2$                                                        | 0.0                    | -                          | -                             | -                          | -3.84                  |
| $\text{NH}_2 + \text{SiH}_2\text{NH}_2 \rightarrow \text{SiH}_2(\text{NH}_2)_2$                                         | 0.0                    | -                          | -                             | -                          | -4.07                  |
| $\text{NH}_2 + \text{SiH}(\text{NH}_2)_2 \rightarrow \text{SiH}(\text{NH}_2)_3$                                         | 0.0                    | -                          | -                             | -                          | -4.22                  |
| $\text{NH}_2 + \text{Si}(\text{NH}_2)_3 \rightarrow \text{Si}(\text{NH}_2)_4$                                           | 0.0                    | -                          | -                             | -                          | -4.28                  |
| $\text{SiH}_3 + \text{SiH}_3\text{NH} \rightarrow (\text{SiH}_3)_2\text{NH}$                                            | 0.0                    | -                          | -                             | -                          | -4.13                  |
| $\text{SiH}_3 + (\text{SiH}_3)_2\text{N} \rightarrow (\text{SiH}_3)_3\text{N}$                                          | 0.0                    | -                          | -                             | -                          | -4.79                  |
| $\text{SiH}_3 + \text{NH}_3 \rightarrow \text{SiH}_3\text{NH}_3$                                                        | 0.0                    | 0.42                       | 0.67                          | -                          | 1.16                   |
| $\text{NH}_2\text{SiH}_2 + \text{NH}_3 \rightarrow \text{NH}_2\text{SiH}_2\text{NH}_3$                                  | 0.0                    | 0.45                       | 1.17                          | -                          | 1.04                   |
| $(\text{NH}_2)_2\text{SiH} + \text{NH}_3 \rightarrow (\text{NH}_2)_2\text{SiHNH}_3$                                     | 0.0                    | 0.34                       | 1.20                          | -                          | 0.90                   |
| $\text{NH}_3\text{SiH}_3 \rightarrow \text{NH}_2\text{SiH}_3 + \text{H}$                                                | 0.0                    | -                          | 0.27                          | -0.39                      | -0.88                  |
| $\text{NH}_2\text{SiH}_2\text{NH}_3 \rightarrow (\text{NH}_2)_2\text{SiH}_2 + \text{H}$                                 | 0.0                    | -                          | 0.21                          | -0.57                      | -1.02                  |
| $(\text{NH}_2)_2\text{SiHNH}_3 \rightarrow (\text{NH}_2)_3\text{SiH} + \text{H}$                                        | 0.0                    | -                          | 0.13                          | -0.58                      | -1.08                  |
| $(\text{NH}_2)_3\text{SiNH}_3 \rightarrow (\text{NH}_2)_4\text{Si} + \text{H}$                                          | 0.0                    | -                          | 0.15                          | -0.55                      | -0.94                  |
| $\text{SiH}_2 + \text{NH}_3 \rightarrow \text{SiH}_2\text{-NH}_3$                                                       | 0.0                    | -                          | -                             | -                          | -0.49                  |
| $\text{SiH}_2 + \text{NH}_2\text{SiH}_3 \rightarrow \text{SiH}_2\text{-NH}_2\text{SiH}_3$                               | 0.0                    | -                          | -                             | -                          | -0.37                  |
| $\text{SiH}_2 + \text{NH}(\text{SiH}_3)_2 \rightarrow \text{SiH}_2\text{-NH}(\text{SiH}_3)_2$                           | 0.0                    | -                          | -                             | -                          | -0.27                  |
| $\text{SiH}_2\text{-NH}_3 + \text{NH}_3 \rightarrow \text{NH}_3\text{-SiH}_2\text{-NH}_3$                               | 0.0                    | 0.46                       | -                             | -                          | 0.48                   |
| $\text{SiH}_2\text{-NH}_3 \rightarrow \text{SiH}_3\text{NH}_2$                                                          | 0.0                    | -                          | 1.44                          | -                          | -1.75                  |
| $\text{SiH}_2\text{-NH}_2\text{SiH}_3 \rightarrow \text{NH}(\text{SiH}_3)_2$                                            | 0.0                    | -                          | 1.22                          | -                          | -1.93                  |
| $\text{SiH}_2\text{-NH}(\text{SiH}_3)_2 \rightarrow \text{N}(\text{SiH}_3)_3$                                           | 0.0                    | -                          | 1.05                          | -                          | -2.03                  |
| $\text{NH}_2 + \text{SiH}_4 \rightarrow \text{NH}_2\text{SiH}_3 + \text{H}$                                             | 0.0                    | 0.41                       | 0.90                          | -0.05                      | -0.47                  |
| $\text{NH}_2 + \text{NH}_2\text{SiH}_3 \rightarrow (\text{NH}_2)_2\text{SiH}_2 + \text{H}$                              | 0.0                    | 0.35                       | 0.73                          | -0.18                      | -0.61                  |
| $\text{NH}_2 + (\text{NH}_2)_2\text{SiH}_2 \rightarrow (\text{NH}_2)_3\text{SiH} + \text{H}$                            | 0.0                    | 0.38                       | 0.65                          | -0.30                      | -0.80                  |
| $\text{NH}_2 + (\text{NH}_2)_3\text{SiH} \rightarrow (\text{NH}_2)_4\text{Si} + \text{H}$                               | 0.0                    | 0.50                       | 0.80                          | -0.31                      | -0.73                  |
| $\text{SiH}_3 + \text{SiH}_4 \rightarrow \text{SiH}_4 + \text{SiH}_3$                                                   | 0.0                    | 0.57                       | 0.83                          | 0.57                       | 0.02                   |
| $\text{SiH}_3 + \text{NH}_2\text{SiH}_3 \rightarrow \text{NH}_2\text{SiH}_2 + \text{SiH}_4$                             | 0.0                    | 0.41                       | 0.85                          | 0.40                       | 0.04                   |
| $\text{SiH}_3 + (\text{NH}_2)_2\text{SiH}_2 \rightarrow (\text{NH}_2)_2\text{SiH} + \text{SiH}_4$                       | 0.0                    | 0.43                       | 0.89                          | 0.51                       | 0.07                   |
| $\text{SiH}_3 + (\text{NH}_2)_3\text{SiH} \rightarrow (\text{NH}_2)_3\text{Si} + \text{SiH}_4$                          | 0.0                    | 0.46                       | 1.11                          | 0.70                       | 0.20                   |
| $\text{NH}_2 + \text{SiH}_4 \rightarrow \text{SiH}_3 + \text{NH}_3$                                                     | 0.0                    | 0.39                       | 0.76                          | -0.30                      | -0.67                  |
| $\text{NH}_2 + \text{NH}_2\text{SiH}_3 \rightarrow \text{NH}_2\text{SiH}_2 + \text{NH}_3$                               | 0.0                    | 0.52                       | 0.85                          | -0.31                      | -0.65                  |
| $\text{NH}_2 + (\text{NH}_2)_2\text{SiH}_2 \rightarrow (\text{NH}_2)_2\text{SiH} + \text{NH}_3$                         | 0.0                    | 0.39                       | 0.82                          | -0.21                      | -0.57                  |
| $\text{NH}_2 + (\text{NH}_2)_3\text{SiH} \rightarrow (\text{NH}_2)_3\text{Si} + \text{NH}_3$                            | 0.0                    | 0.50                       | 0.78                          | 0.01                       | -0.45                  |
| $\text{SiH}_4 + \text{H} \rightarrow \text{SiH}_3 + \text{H}_2$                                                         | 0.0                    | 0.42                       | 0.67                          | -0.13                      | -0.34                  |
| $\text{NH}_2\text{SiH}_3 + \text{H} \rightarrow \text{NH}_2\text{SiH}_2 + \text{H}_2$                                   | 0.0                    | 0.48                       | 0.62                          | -0.05                      | -0.29                  |
| $(\text{NH}_2)_2\text{SiH}_2 + \text{H} \rightarrow (\text{NH}_2)_2\text{SiH} + \text{H}_2$                             | 0.0                    | 0.47                       | 0.70                          | 0.02                       | -0.25                  |
| $(\text{NH}_2)_3\text{SiH} + \text{H} \rightarrow (\text{NH}_2)_3\text{Si} + \text{H}_2$                                | 0.0                    | 0.49                       | 0.69                          | 0.15                       | -0.13                  |

Table 24: Relative Gibbs free energies of reactants ( $\Delta G_r$ ), pre-reaction complexes( $\Delta G_{pk1}$ ), transition states ( $\Delta G^\ddagger$ ), post-reaction complexes ( $\Delta G_{pk2}$ ) and products ( $\Delta G_p$ ) for reactions in silane-ammonia plasma at 350 K and 200 Pa. All Gibbs free energies are calculated with MP2/aug-cc-pVTZ//CASPT2/aug-cc-pVTZ method and vibrational contribution to entropy is calculated with MP2/aug-cc-pVTZ. Entropy of hydrogen molecule is taken from NIST-JANAF thermochemical tables.<sup>1</sup> Relative Gibbs free energies are shown relative to reactants.

| reaction                                                                                                                | $\Delta G_r/\text{eV}$ | $\Delta G_{pk1}/\text{eV}$ | $\Delta G^\ddagger/\text{eV}$ | $\Delta G_{pk2}/\text{eV}$ | $\Delta G_p/\text{eV}$ |
|-------------------------------------------------------------------------------------------------------------------------|------------------------|----------------------------|-------------------------------|----------------------------|------------------------|
| $\text{NH}_3 + \text{SiH}_4 \rightarrow \text{SiH}_3\text{NH}_2 + \text{H}_2$                                           | 0.0                    | 0.33                       | 2.40                          | -0.05                      | -0.26                  |
| $\text{NH}_3 + \text{SiH}_3\text{NH}_2 \rightarrow \text{SiH}_2(\text{NH}_2)_2 + \text{H}_2$                            | 0.0                    | 0.40                       | 2.13                          | -0.17                      | -0.38                  |
| $\text{NH}_3 + \text{SiH}_2(\text{NH}_2)_2 \rightarrow \text{SiH}(\text{NH}_2)_3 + \text{H}_2$                          | 0.0                    | 0.33                       | 2.42                          | -0.28                      | -0.44                  |
| $\text{NH}_3 + \text{SiH}(\text{NH}_2)_3 \rightarrow \text{Si}(\text{NH}_2)_4 + \text{H}_2$                             | 0.0                    | 0.43                       | 2.43                          | -0.21                      | -0.46                  |
| $\text{SiH}_4 + \text{NH}_2\text{SiH}_3 \rightarrow (\text{SiH}_3)_2\text{NH} + \text{H}_2$                             | 0.0                    | 0.39                       | 2.40                          | -0.18                      | -0.40                  |
| $\text{SiH}_4 + (\text{SiH}_3)_2\text{NH} \rightarrow (\text{SiH}_3)_3\text{N} + \text{H}_2$                            | 0.0                    | 0.47                       | 2.46                          | -0.15                      | -0.32                  |
| $\text{SiH}_3\text{NH}_2 + (\text{NH}_2)_3\text{SiH} \rightarrow \text{SiH}_3\text{-NH-Si}(\text{NH}_2)_3 + \text{H}_2$ | 0.0                    | 0.42                       | 2.53                          | -0.27                      | -0.48                  |
| $\text{SiH}_3\text{NH}_2 \rightarrow \text{SiHNH}_2 + \text{H}_2$                                                       | 0.0                    | -                          | 2.59                          | 1.42                       | 1.21                   |
| $\text{SiH}_2(\text{NH}_2)_2 \rightarrow \text{Si}(\text{NH}_2)_2 + \text{H}_2$                                         | 0.0                    | -                          | 3.03                          | 1.03                       | 0.84                   |
| $\text{NH}_2 + \text{SiH}_3 \rightarrow \text{SiH}_3\text{NH}_2$                                                        | 0.0                    | -                          | -                             | -                          | -3.86                  |
| $\text{NH}_2 + \text{SiH}_2\text{NH}_2 \rightarrow \text{SiH}_2(\text{NH}_2)_2$                                         | 0.0                    | -                          | -                             | -                          | -4.09                  |
| $\text{NH}_2 + \text{SiH}(\text{NH}_2)_2 \rightarrow \text{SiH}(\text{NH}_2)_3$                                         | 0.0                    | -                          | -                             | -                          | -4.24                  |
| $\text{NH}_2 + \text{Si}(\text{NH}_2)_3 \rightarrow \text{Si}(\text{NH}_2)_4$                                           | 0.0                    | -                          | -                             | -                          | -4.30                  |
| $\text{SiH}_3 + \text{SiH}_3\text{NH} \rightarrow (\text{SiH}_3)_2\text{NH}$                                            | 0.0                    | -                          | -                             | -                          | -4.15                  |
| $\text{SiH}_3 + (\text{SiH}_3)_2\text{N} \rightarrow (\text{SiH}_3)_3\text{N}$                                          | 0.0                    | -                          | -                             | -                          | -4.81                  |
| $\text{SiH}_3 + \text{NH}_3 \rightarrow \text{SiH}_3\text{NH}_3$                                                        | 0.0                    | 0.40                       | 0.65                          | -                          | 1.14                   |
| $\text{NH}_2\text{SiH}_2 + \text{NH}_3 \rightarrow \text{NH}_2\text{SiH}_2\text{NH}_3$                                  | 0.0                    | 0.43                       | 1.14                          | -                          | 1.02                   |
| $(\text{NH}_2)_2\text{SiH} + \text{NH}_3 \rightarrow (\text{NH}_2)_2\text{SiHNH}_3$                                     | 0.0                    | 0.32                       | 1.17                          | -                          | 0.88                   |
| $\text{NH}_3\text{SiH}_3 \rightarrow \text{NH}_2\text{SiH}_3 + \text{H}$                                                | 0.0                    | -                          | 0.27                          | -0.39                      | -0.86                  |
| $\text{NH}_2\text{SiH}_2\text{NH}_3 \rightarrow (\text{NH}_2)_2\text{SiH}_2 + \text{H}$                                 | 0.0                    | -                          | 0.21                          | -0.57                      | -1.00                  |
| $(\text{NH}_2)_2\text{SiHNH}_3 \rightarrow (\text{NH}_2)_3\text{SiH} + \text{H}$                                        | 0.0                    | -                          | 0.13                          | -0.58                      | -1.06                  |
| $(\text{NH}_2)_3\text{SiNH}_3 \rightarrow (\text{NH}_2)_4\text{Si} + \text{H}$                                          | 0.0                    | -                          | 0.15                          | -0.55                      | -0.92                  |
| $\text{SiH}_2 + \text{NH}_3 \rightarrow \text{SiH}_2\text{-NH}_3$                                                       | 0.0                    | -                          | -                             | -                          | -0.51                  |
| $\text{SiH}_2 + \text{NH}_2\text{SiH}_3 \rightarrow \text{SiH}_2\text{-NH}_2\text{SiH}_3$                               | 0.0                    | -                          | -                             | -                          | -0.39                  |
| $\text{SiH}_2 + \text{NH}(\text{SiH}_3)_2 \rightarrow \text{SiH}_2\text{-NH}(\text{SiH}_3)_2$                           | 0.0                    | -                          | -                             | -                          | -0.29                  |
| $\text{SiH}_2\text{-NH}_3 + \text{NH}_3 \rightarrow \text{NH}_3\text{-SiH}_2\text{-NH}_3$                               | 0.0                    | 0.44                       | -                             | -                          | 0.46                   |
| $\text{SiH}_2\text{-NH}_3 \rightarrow \text{SiH}_3\text{NH}_2$                                                          | 0.0                    | -                          | 1.44                          | -                          | -1.75                  |
| $\text{SiH}_2\text{-NH}_2\text{SiH}_3 \rightarrow \text{NH}(\text{SiH}_3)_2$                                            | 0.0                    | -                          | 1.22                          | -                          | -1.93                  |
| $\text{SiH}_2\text{-NH}(\text{SiH}_3)_2 \rightarrow \text{N}(\text{SiH}_3)_3$                                           | 0.0                    | -                          | 1.05                          | -                          | -2.03                  |
| $\text{NH}_2 + \text{SiH}_4 \rightarrow \text{NH}_2\text{SiH}_3 + \text{H}$                                             | 0.0                    | 0.39                       | 0.88                          | -0.07                      | -0.47                  |
| $\text{NH}_2 + \text{NH}_2\text{SiH}_3 \rightarrow (\text{NH}_2)_2\text{SiH}_2 + \text{H}$                              | 0.0                    | 0.33                       | 0.71                          | -0.20                      | -0.61                  |
| $\text{NH}_2 + (\text{NH}_2)_2\text{SiH}_2 \rightarrow (\text{NH}_2)_3\text{SiH} + \text{H}$                            | 0.0                    | 0.35                       | 0.63                          | -0.32                      | -0.80                  |
| $\text{NH}_2 + (\text{NH}_2)_3\text{SiH} \rightarrow (\text{NH}_2)_4\text{Si} + \text{H}$                               | 0.0                    | 0.48                       | 0.78                          | -0.33                      | -0.73                  |
| $\text{SiH}_3 + \text{SiH}_4 \rightarrow \text{SiH}_4 + \text{SiH}_3$                                                   | 0.0                    | 0.54                       | 0.80                          | 0.54                       | 0.02                   |
| $\text{SiH}_3 + \text{NH}_2\text{SiH}_3 \rightarrow \text{NH}_2\text{SiH}_2 + \text{SiH}_4$                             | 0.0                    | 0.39                       | 0.83                          | 0.38                       | 0.04                   |
| $\text{SiH}_3 + (\text{NH}_2)_2\text{SiH}_2 \rightarrow (\text{NH}_2)_2\text{SiH} + \text{SiH}_4$                       | 0.0                    | 0.41                       | 0.87                          | 0.49                       | 0.07                   |
| $\text{SiH}_3 + (\text{NH}_2)_3\text{SiH} \rightarrow (\text{NH}_2)_3\text{Si} + \text{SiH}_4$                          | 0.0                    | 0.44                       | 1.09                          | 0.67                       | 0.20                   |
| $\text{NH}_2 + \text{SiH}_4 \rightarrow \text{SiH}_3 + \text{NH}_3$                                                     | 0.0                    | 0.37                       | 0.74                          | -0.32                      | -0.67                  |
| $\text{NH}_2 + \text{NH}_2\text{SiH}_3 \rightarrow \text{NH}_2\text{SiH}_2 + \text{NH}_3$                               | 0.0                    | 0.50                       | 0.83                          | -0.34                      | -0.65                  |
| $\text{NH}_2 + (\text{NH}_2)_2\text{SiH}_2 \rightarrow (\text{NH}_2)_2\text{SiH} + \text{NH}_3$                         | 0.0                    | 0.37                       | 0.80                          | -0.23                      | -0.57                  |
| $\text{NH}_2 + (\text{NH}_2)_3\text{SiH} \rightarrow (\text{NH}_2)_3\text{Si} + \text{NH}_3$                            | 0.0                    | 0.48                       | 0.76                          | -0.01                      | -0.45                  |
| $\text{SiH}_4 + \text{H} \rightarrow \text{SiH}_3 + \text{H}_2$                                                         | 0.0                    | 0.40                       | 0.65                          | -0.15                      | -0.36                  |
| $\text{NH}_2\text{SiH}_3 + \text{H} \rightarrow \text{NH}_2\text{SiH}_2 + \text{H}_2$                                   | 0.0                    | 0.46                       | 0.60                          | -0.07                      | -0.31                  |
| $(\text{NH}_2)_2\text{SiH}_2 + \text{H} \rightarrow (\text{NH}_2)_2\text{SiH} + \text{H}_2$                             | 0.0                    | 0.45                       | 0.68                          | -0.00                      | -0.27                  |
| $(\text{NH}_2)_3\text{SiH} + \text{H} \rightarrow (\text{NH}_2)_3\text{Si} + \text{H}_2$                                | 0.0                    | 0.47                       | 0.67                          | 0.13                       | -0.15                  |

Table 25: Relative Gibbs free energies of reactants ( $\Delta G_r$ ), pre-reaction complexes( $\Delta G_{pk1}$ ), transition states ( $\Delta G^\ddagger$ ), post-reaction complexes ( $\Delta G_{pk2}$ ) and products ( $\Delta G_p$ ) for reactions in silane-ammonia plasma at 350 K and 300 Pa. All Gibbs free energies are calculated with MP2/aug-cc-pVTZ//CASPT2/aug-cc-pVTZ method and vibrational contribution to entropy is calculated with MP2/aug-cc-pVTZ. Entropy of hydrogen molecule is taken from NIST-JANAF thermochemical tables.<sup>1</sup> Relative Gibbs free energies are shown relative to reactants.

| reaction                                                                                                                | $\Delta G_r/\text{eV}$ | $\Delta G_{pk1}/\text{eV}$ | $\Delta G^\ddagger/\text{eV}$ | $\Delta G_{pk2}/\text{eV}$ | $\Delta G_p/\text{eV}$ |
|-------------------------------------------------------------------------------------------------------------------------|------------------------|----------------------------|-------------------------------|----------------------------|------------------------|
| $\text{NH}_3 + \text{SiH}_4 \rightarrow \text{SiH}_3\text{NH}_2 + \text{H}_2$                                           | 0.0                    | 0.32                       | 2.39                          | -0.06                      | -0.27                  |
| $\text{NH}_3 + \text{SiH}_3\text{NH}_2 \rightarrow \text{SiH}_2(\text{NH}_2)_2 + \text{H}_2$                            | 0.0                    | 0.39                       | 2.12                          | -0.19                      | -0.39                  |
| $\text{NH}_3 + \text{SiH}_2(\text{NH}_2)_2 \rightarrow \text{SiH}(\text{NH}_2)_3 + \text{H}_2$                          | 0.0                    | 0.32                       | 2.40                          | -0.30                      | -0.46                  |
| $\text{NH}_3 + \text{SiH}(\text{NH}_2)_3 \rightarrow \text{Si}(\text{NH}_2)_4 + \text{H}_2$                             | 0.0                    | 0.42                       | 2.42                          | -0.23                      | -0.47                  |
| $\text{SiH}_4 + \text{NH}_2\text{SiH}_3 \rightarrow (\text{SiH}_3)_2\text{NH} + \text{H}_2$                             | 0.0                    | 0.38                       | 2.39                          | -0.19                      | -0.42                  |
| $\text{SiH}_4 + (\text{SiH}_3)_2\text{NH} \rightarrow (\text{SiH}_3)_3\text{N} + \text{H}_2$                            | 0.0                    | 0.46                       | 2.45                          | -0.16                      | -0.33                  |
| $\text{SiH}_3\text{NH}_2 + (\text{NH}_2)_3\text{SiH} \rightarrow \text{SiH}_3\text{-NH-Si}(\text{NH}_2)_3 + \text{H}_2$ | 0.0                    | 0.41                       | 2.52                          | -0.28                      | -0.49                  |
| $\text{SiH}_3\text{NH}_2 \rightarrow \text{SiHNH}_2 + \text{H}_2$                                                       | 0.0                    | -                          | 2.59                          | 1.42                       | 1.21                   |
| $\text{SiH}_2(\text{NH}_2)_2 \rightarrow \text{Si}(\text{NH}_2)_2 + \text{H}_2$                                         | 0.0                    | -                          | 3.03                          | 1.03                       | 0.84                   |
| $\text{NH}_2 + \text{SiH}_3 \rightarrow \text{SiH}_3\text{NH}_2$                                                        | 0.0                    | -                          | -                             | -                          | -3.87                  |
| $\text{NH}_2 + \text{SiH}_2\text{NH}_2 \rightarrow \text{SiH}_2(\text{NH}_2)_2$                                         | 0.0                    | -                          | -                             | -                          | -4.10                  |
| $\text{NH}_2 + \text{SiH}(\text{NH}_2)_2 \rightarrow \text{SiH}(\text{NH}_2)_3$                                         | 0.0                    | -                          | -                             | -                          | -4.26                  |
| $\text{NH}_2 + \text{Si}(\text{NH}_2)_3 \rightarrow \text{Si}(\text{NH}_2)_4$                                           | 0.0                    | -                          | -                             | -                          | -4.32                  |
| $\text{SiH}_3 + \text{SiH}_3\text{NH} \rightarrow (\text{SiH}_3)_2\text{NH}$                                            | 0.0                    | -                          | -                             | -                          | -4.16                  |
| $\text{SiH}_3 + (\text{SiH}_3)_2\text{N} \rightarrow (\text{SiH}_3)_3\text{N}$                                          | 0.0                    | -                          | -                             | -                          | -4.82                  |
| $\text{SiH}_3 + \text{NH}_3 \rightarrow \text{SiH}_3\text{NH}_3$                                                        | 0.0                    | 0.38                       | 0.64                          | -                          | 1.13                   |
| $\text{NH}_2\text{SiH}_2 + \text{NH}_3 \rightarrow \text{NH}_2\text{SiH}_2\text{NH}_3$                                  | 0.0                    | 0.42                       | 1.13                          | -                          | 1.01                   |
| $(\text{NH}_2)_2\text{SiH} + \text{NH}_3 \rightarrow (\text{NH}_2)_2\text{SiHNH}_3$                                     | 0.0                    | 0.31                       | 1.16                          | -                          | 0.87                   |
| $\text{NH}_3\text{SiH}_3 \rightarrow \text{NH}_2\text{SiH}_3 + \text{H}$                                                | 0.0                    | -                          | 0.27                          | -0.39                      | -0.85                  |
| $\text{NH}_2\text{SiH}_2\text{NH}_3 \rightarrow (\text{NH}_2)_2\text{SiH}_2 + \text{H}$                                 | 0.0                    | -                          | 0.21                          | -0.57                      | -0.99                  |
| $(\text{NH}_2)_2\text{SiHNH}_3 \rightarrow (\text{NH}_2)_3\text{SiH} + \text{H}$                                        | 0.0                    | -                          | 0.13                          | -0.58                      | -1.05                  |
| $(\text{NH}_2)_3\text{SiNH}_3 \rightarrow (\text{NH}_2)_4\text{Si} + \text{H}$                                          | 0.0                    | -                          | 0.15                          | -0.55                      | -0.90                  |
| $\text{SiH}_2 + \text{NH}_3 \rightarrow \text{SiH}_2\text{-NH}_3$                                                       | 0.0                    | -                          | -                             | -                          | -0.53                  |
| $\text{SiH}_2 + \text{NH}_2\text{SiH}_3 \rightarrow \text{SiH}_2\text{-NH}_2\text{SiH}_3$                               | 0.0                    | -                          | -                             | -                          | -0.40                  |
| $\text{SiH}_2 + \text{NH}(\text{SiH}_3)_2 \rightarrow \text{SiH}_2\text{-NH}(\text{SiH}_3)_2$                           | 0.0                    | -                          | -                             | -                          | -0.30                  |
| $\text{SiH}_2\text{-NH}_3 + \text{NH}_3 \rightarrow \text{NH}_3\text{-SiH}_2\text{-NH}_3$                               | 0.0                    | 0.43                       | -                             | -                          | 0.45                   |
| $\text{SiH}_2\text{-NH}_3 \rightarrow \text{SiH}_3\text{NH}_2$                                                          | 0.0                    | -                          | 1.44                          | -                          | -1.75                  |
| $\text{SiH}_2\text{-NH}_2\text{SiH}_3 \rightarrow \text{NH}(\text{SiH}_3)_2$                                            | 0.0                    | -                          | 1.22                          | -                          | -1.93                  |
| $\text{SiH}_2\text{-NH}(\text{SiH}_3)_2 \rightarrow \text{N}(\text{SiH}_3)_3$                                           | 0.0                    | -                          | 1.05                          | -                          | -2.03                  |
| $\text{NH}_2 + \text{SiH}_4 \rightarrow \text{NH}_2\text{SiH}_3 + \text{H}$                                             | 0.0                    | 0.38                       | 0.86                          | -0.08                      | -0.47                  |
| $\text{NH}_2 + \text{NH}_2\text{SiH}_3 \rightarrow (\text{NH}_2)_2\text{SiH}_2 + \text{H}$                              | 0.0                    | 0.32                       | 0.70                          | -0.21                      | -0.61                  |
| $\text{NH}_2 + (\text{NH}_2)_2\text{SiH}_2 \rightarrow (\text{NH}_2)_3\text{SiH} + \text{H}$                            | 0.0                    | 0.34                       | 0.62                          | -0.33                      | -0.80                  |
| $\text{NH}_2 + (\text{NH}_2)_3\text{SiH} \rightarrow (\text{NH}_2)_4\text{Si} + \text{H}$                               | 0.0                    | 0.47                       | 0.76                          | -0.35                      | -0.73                  |
| $\text{SiH}_3 + \text{SiH}_4 \rightarrow \text{SiH}_4 + \text{SiH}_3$                                                   | 0.0                    | 0.53                       | 0.79                          | 0.53                       | 0.02                   |
| $\text{SiH}_3 + \text{NH}_2\text{SiH}_3 \rightarrow \text{NH}_2\text{SiH}_2 + \text{SiH}_4$                             | 0.0                    | 0.38                       | 0.82                          | 0.36                       | 0.04                   |
| $\text{SiH}_3 + (\text{NH}_2)_2\text{SiH}_2 \rightarrow (\text{NH}_2)_2\text{SiH} + \text{SiH}_4$                       | 0.0                    | 0.39                       | 0.86                          | 0.48                       | 0.07                   |
| $\text{SiH}_3 + (\text{NH}_2)_3\text{SiH} \rightarrow (\text{NH}_2)_3\text{Si} + \text{SiH}_4$                          | 0.0                    | 0.43                       | 1.07                          | 0.66                       | 0.20                   |
| $\text{NH}_2 + \text{SiH}_4 \rightarrow \text{SiH}_3 + \text{NH}_3$                                                     | 0.0                    | 0.36                       | 0.73                          | -0.33                      | -0.67                  |
| $\text{NH}_2 + \text{NH}_2\text{SiH}_3 \rightarrow \text{NH}_2\text{SiH}_2 + \text{NH}_3$                               | 0.0                    | 0.48                       | 0.81                          | -0.35                      | -0.65                  |
| $\text{NH}_2 + (\text{NH}_2)_2\text{SiH}_2 \rightarrow (\text{NH}_2)_2\text{SiH} + \text{NH}_3$                         | 0.0                    | 0.36                       | 0.79                          | -0.24                      | -0.57                  |
| $\text{NH}_2 + (\text{NH}_2)_3\text{SiH} \rightarrow (\text{NH}_2)_3\text{Si} + \text{NH}_3$                            | 0.0                    | 0.47                       | 0.75                          | -0.02                      | -0.45                  |
| $\text{SiH}_4 + \text{H} \rightarrow \text{SiH}_3 + \text{H}_2$                                                         | 0.0                    | 0.38                       | 0.64                          | -0.16                      | -0.37                  |
| $\text{NH}_2\text{SiH}_3 + \text{H} \rightarrow \text{NH}_2\text{SiH}_2 + \text{H}_2$                                   | 0.0                    | 0.45                       | 0.59                          | -0.09                      | -0.32                  |
| $(\text{NH}_2)_2\text{SiH}_2 + \text{H} \rightarrow (\text{NH}_2)_2\text{SiH} + \text{H}_2$                             | 0.0                    | 0.44                       | 0.67                          | -0.01                      | -0.28                  |
| $(\text{NH}_2)_3\text{SiH} + \text{H} \rightarrow (\text{NH}_2)_3\text{Si} + \text{H}_2$                                | 0.0                    | 0.46                       | 0.66                          | 0.12                       | -0.16                  |

Table 26: Relative Gibbs free energies of reactants ( $\Delta G_r$ ), pre-reaction complexes( $\Delta G_{pk1}$ ), transition states ( $\Delta G^\ddagger$ ), post-reaction complexes ( $\Delta G_{pk2}$ ) and products ( $\Delta G_p$ ) for reactions in silane-ammonia plasma at 350 K and 400 Pa. All Gibbs free energies are calculated with MP2/aug-cc-pVTZ//CASPT2/aug-cc-pVTZ method and vibrational contribution to entropy is calculated with MP2/aug-cc-pVTZ. Entropy of hydrogen molecule is taken from NIST-JANAF thermochemical tables.<sup>1</sup> Relative Gibbs free energies are shown relative to reactants.

| reaction                                                                                                                | $\Delta G_r/\text{eV}$ | $\Delta G_{pk1}/\text{eV}$ | $\Delta G^\ddagger/\text{eV}$ | $\Delta G_{pk2}/\text{eV}$ | $\Delta G_p/\text{eV}$ |
|-------------------------------------------------------------------------------------------------------------------------|------------------------|----------------------------|-------------------------------|----------------------------|------------------------|
| $\text{NH}_3 + \text{SiH}_4 \rightarrow \text{SiH}_3\text{NH}_2 + \text{H}_2$                                           | 0.0                    | 0.31                       | 2.38                          | -0.07                      | -0.28                  |
| $\text{NH}_3 + \text{SiH}_3\text{NH}_2 \rightarrow \text{SiH}_2(\text{NH}_2)_2 + \text{H}_2$                            | 0.0                    | 0.38                       | 2.11                          | -0.20                      | -0.40                  |
| $\text{NH}_3 + \text{SiH}_2(\text{NH}_2)_2 \rightarrow \text{SiH}(\text{NH}_2)_3 + \text{H}_2$                          | 0.0                    | 0.31                       | 2.40                          | -0.30                      | -0.46                  |
| $\text{NH}_3 + \text{SiH}(\text{NH}_2)_3 \rightarrow \text{Si}(\text{NH}_2)_4 + \text{H}_2$                             | 0.0                    | 0.41                       | 2.41                          | -0.23                      | -0.48                  |
| $\text{SiH}_4 + \text{NH}_2\text{SiH}_3 \rightarrow (\text{SiH}_3)_2\text{NH} + \text{H}_2$                             | 0.0                    | 0.37                       | 2.38                          | -0.20                      | -0.42                  |
| $\text{SiH}_4 + (\text{SiH}_3)_2\text{NH} \rightarrow (\text{SiH}_3)_3\text{N} + \text{H}_2$                            | 0.0                    | 0.45                       | 2.44                          | -0.17                      | -0.34                  |
| $\text{SiH}_3\text{NH}_2 + (\text{NH}_2)_3\text{SiH} \rightarrow \text{SiH}_3\text{-NH-Si}(\text{NH}_2)_3 + \text{H}_2$ | 0.0                    | 0.40                       | 2.51                          | -0.29                      | -0.50                  |
| $\text{SiH}_3\text{NH}_2 \rightarrow \text{SiHNH}_2 + \text{H}_2$                                                       | 0.0                    | -                          | 2.59                          | 1.42                       | 1.21                   |
| $\text{SiH}_2(\text{NH}_2)_2 \rightarrow \text{Si}(\text{NH}_2)_2 + \text{H}_2$                                         | 0.0                    | -                          | 3.03                          | 1.03                       | 0.84                   |
| $\text{NH}_2 + \text{SiH}_3 \rightarrow \text{SiH}_3\text{NH}_2$                                                        | 0.0                    | -                          | -                             | -                          | -3.88                  |
| $\text{NH}_2 + \text{SiH}_2\text{NH}_2 \rightarrow \text{SiH}_2(\text{NH}_2)_2$                                         | 0.0                    | -                          | -                             | -                          | -4.11                  |
| $\text{NH}_2 + \text{SiH}(\text{NH}_2)_2 \rightarrow \text{SiH}(\text{NH}_2)_3$                                         | 0.0                    | -                          | -                             | -                          | -4.27                  |
| $\text{NH}_2 + \text{Si}(\text{NH}_2)_3 \rightarrow \text{Si}(\text{NH}_2)_4$                                           | 0.0                    | -                          | -                             | -                          | -4.33                  |
| $\text{SiH}_3 + \text{SiH}_3\text{NH} \rightarrow (\text{SiH}_3)_2\text{NH}$                                            | 0.0                    | -                          | -                             | -                          | -4.17                  |
| $\text{SiH}_3 + (\text{SiH}_3)_2\text{N} \rightarrow (\text{SiH}_3)_3\text{N}$                                          | 0.0                    | -                          | -                             | -                          | -4.83                  |
| $\text{SiH}_3 + \text{NH}_3 \rightarrow \text{SiH}_3\text{NH}_3$                                                        | 0.0                    | 0.38                       | 0.63                          | -                          | 1.12                   |
| $\text{NH}_2\text{SiH}_2 + \text{NH}_3 \rightarrow \text{NH}_2\text{SiH}_2\text{NH}_3$                                  | 0.0                    | 0.41                       | 1.12                          | -                          | 1.00                   |
| $(\text{NH}_2)_2\text{SiH} + \text{NH}_3 \rightarrow (\text{NH}_2)_2\text{SiHNH}_3$                                     | 0.0                    | 0.30                       | 1.15                          | -                          | 0.86                   |
| $\text{NH}_3\text{SiH}_3 \rightarrow \text{NH}_2\text{SiH}_3 + \text{H}$                                                | 0.0                    | -                          | 0.27                          | -0.39                      | -0.84                  |
| $\text{NH}_2\text{SiH}_2\text{NH}_3 \rightarrow (\text{NH}_2)_2\text{SiH}_2 + \text{H}$                                 | 0.0                    | -                          | 0.21                          | -0.57                      | -0.98                  |
| $(\text{NH}_2)_2\text{SiHNH}_3 \rightarrow (\text{NH}_2)_3\text{SiH} + \text{H}$                                        | 0.0                    | -                          | 0.13                          | -0.58                      | -1.04                  |
| $(\text{NH}_2)_3\text{SiNH}_3 \rightarrow (\text{NH}_2)_4\text{Si} + \text{H}$                                          | 0.0                    | -                          | 0.15                          | -0.55                      | -0.90                  |
| $\text{SiH}_2 + \text{NH}_3 \rightarrow \text{SiH}_2\text{-NH}_3$                                                       | 0.0                    | -                          | -                             | -                          | -0.53                  |
| $\text{SiH}_2 + \text{NH}_2\text{SiH}_3 \rightarrow \text{SiH}_2\text{-NH}_2\text{SiH}_3$                               | 0.0                    | -                          | -                             | -                          | -0.41                  |
| $\text{SiH}_2 + \text{NH}(\text{SiH}_3)_2 \rightarrow \text{SiH}_2\text{-NH}(\text{SiH}_3)_2$                           | 0.0                    | -                          | -                             | -                          | -0.31                  |
| $\text{SiH}_2\text{-NH}_3 + \text{NH}_3 \rightarrow \text{NH}_3\text{-SiH}_2\text{-NH}_3$                               | 0.0                    | 0.42                       | -                             | -                          | 0.44                   |
| $\text{SiH}_2\text{-NH}_3 \rightarrow \text{SiH}_3\text{NH}_2$                                                          | 0.0                    | -                          | 1.44                          | -                          | -1.75                  |
| $\text{SiH}_2\text{-NH}_2\text{SiH}_3 \rightarrow \text{NH}(\text{SiH}_3)_2$                                            | 0.0                    | -                          | 1.22                          | -                          | -1.93                  |
| $\text{SiH}_2\text{-NH}(\text{SiH}_3)_2 \rightarrow \text{N}(\text{SiH}_3)_3$                                           | 0.0                    | -                          | 1.05                          | -                          | -2.03                  |
| $\text{NH}_2 + \text{SiH}_4 \rightarrow \text{NH}_2\text{SiH}_3 + \text{H}$                                             | 0.0                    | 0.37                       | 0.85                          | -0.09                      | -0.47                  |
| $\text{NH}_2 + \text{NH}_2\text{SiH}_3 \rightarrow (\text{NH}_2)_2\text{SiH}_2 + \text{H}$                              | 0.0                    | 0.31                       | 0.69                          | -0.22                      | -0.61                  |
| $\text{NH}_2 + (\text{NH}_2)_2\text{SiH}_2 \rightarrow (\text{NH}_2)_3\text{SiH} + \text{H}$                            | 0.0                    | 0.33                       | 0.61                          | -0.34                      | -0.80                  |
| $\text{NH}_2 + (\text{NH}_2)_3\text{SiH} \rightarrow (\text{NH}_2)_4\text{Si} + \text{H}$                               | 0.0                    | 0.46                       | 0.75                          | -0.35                      | -0.73                  |
| $\text{SiH}_3 + \text{SiH}_4 \rightarrow \text{SiH}_4 + \text{SiH}_3$                                                   | 0.0                    | 0.52                       | 0.78                          | 0.52                       | 0.02                   |
| $\text{SiH}_3 + \text{NH}_2\text{SiH}_3 \rightarrow \text{NH}_2\text{SiH}_2 + \text{SiH}_4$                             | 0.0                    | 0.37                       | 0.81                          | 0.35                       | 0.04                   |
| $\text{SiH}_3 + (\text{NH}_2)_2\text{SiH}_2 \rightarrow (\text{NH}_2)_2\text{SiH} + \text{SiH}_4$                       | 0.0                    | 0.38                       | 0.85                          | 0.47                       | 0.07                   |
| $\text{SiH}_3 + (\text{NH}_2)_3\text{SiH} \rightarrow (\text{NH}_2)_3\text{Si} + \text{SiH}_4$                          | 0.0                    | 0.42                       | 1.06                          | 0.65                       | 0.20                   |
| $\text{NH}_2 + \text{SiH}_4 \rightarrow \text{SiH}_3 + \text{NH}_3$                                                     | 0.0                    | 0.35                       | 0.72                          | -0.34                      | -0.67                  |
| $\text{NH}_2 + \text{NH}_2\text{SiH}_3 \rightarrow \text{NH}_2\text{SiH}_2 + \text{NH}_3$                               | 0.0                    | 0.47                       | 0.81                          | -0.36                      | -0.65                  |
| $\text{NH}_2 + (\text{NH}_2)_2\text{SiH}_2 \rightarrow (\text{NH}_2)_2\text{SiH} + \text{NH}_3$                         | 0.0                    | 0.35                       | 0.78                          | -0.25                      | -0.57                  |
| $\text{NH}_2 + (\text{NH}_2)_3\text{SiH} \rightarrow (\text{NH}_2)_3\text{Si} + \text{NH}_3$                            | 0.0                    | 0.46                       | 0.74                          | -0.03                      | -0.45                  |
| $\text{SiH}_4 + \text{H} \rightarrow \text{SiH}_3 + \text{H}_2$                                                         | 0.0                    | 0.37                       | 0.63                          | -0.17                      | -0.38                  |
| $\text{NH}_2\text{SiH}_3 + \text{H} \rightarrow \text{NH}_2\text{SiH}_2 + \text{H}_2$                                   | 0.0                    | 0.44                       | 0.58                          | -0.10                      | -0.33                  |
| $(\text{NH}_2)_2\text{SiH}_2 + \text{H} \rightarrow (\text{NH}_2)_2\text{SiH} + \text{H}_2$                             | 0.0                    | 0.43                       | 0.66                          | -0.02                      | -0.29                  |
| $(\text{NH}_2)_3\text{SiH} + \text{H} \rightarrow (\text{NH}_2)_3\text{Si} + \text{H}_2$                                | 0.0                    | 0.45                       | 0.65                          | 0.11                       | -0.17                  |

Table 27: Relative Gibbs free energies of reactants ( $\Delta G_r$ ), pre-reaction complexes( $\Delta G_{pk1}$ ), transition states ( $\Delta G^\ddagger$ ), post-reaction complexes ( $\Delta G_{pk2}$ ) and products ( $\Delta G_p$ ) for reactions in silane-ammonia plasma at 350 K and 500 Pa. All Gibbs free energies are calculated with MP2/aug-cc-pVTZ//CASPT2/aug-cc-pVTZ method and vibrational contribution to entropy is calculated with MP2/aug-cc-pVTZ. Entropy of hydrogen molecule is taken from NIST-JANAF thermochemical tables.<sup>1</sup> Relative Gibbs free energies are shown relative to reactants.

| reaction                                                                                                                    | $\Delta G_r/\text{eV}$ | $\Delta G_{pk1}/\text{eV}$ | $\Delta G^\ddagger/\text{eV}$ | $\Delta G_{pk2}/\text{eV}$ | $\Delta G_p/\text{eV}$ |
|-----------------------------------------------------------------------------------------------------------------------------|------------------------|----------------------------|-------------------------------|----------------------------|------------------------|
| $\text{NH}_3 + \text{SiH}_4 \longrightarrow \text{SiH}_3\text{NH}_2 + \text{H}_2$                                           | 0.0                    | 0.31                       | 2.37                          | -0.07                      | -0.28                  |
| $\text{NH}_3 + \text{SiH}_3\text{NH}_2 \longrightarrow \text{SiH}_2(\text{NH}_2)_2 + \text{H}_2$                            | 0.0                    | 0.38                       | 2.10                          | -0.20                      | -0.40                  |
| $\text{NH}_3 + \text{SiH}_2(\text{NH}_2)_2 \longrightarrow \text{SiH}(\text{NH}_2)_3 + \text{H}_2$                          | 0.0                    | 0.31                       | 2.39                          | -0.31                      | -0.47                  |
| $\text{NH}_3 + \text{SiH}(\text{NH}_2)_3 \longrightarrow \text{Si}(\text{NH}_2)_4 + \text{H}_2$                             | 0.0                    | 0.40                       | 2.40                          | -0.24                      | -0.49                  |
| $\text{SiH}_4 + \text{NH}_2\text{SiH}_3 \longrightarrow (\text{SiH}_3)_2\text{NH} + \text{H}_2$                             | 0.0                    | 0.36                       | 2.37                          | -0.21                      | -0.43                  |
| $\text{SiH}_4 + (\text{SiH}_3)_2\text{NH} \longrightarrow (\text{SiH}_3)_3\text{N} + \text{H}_2$                            | 0.0                    | 0.44                       | 2.43                          | -0.18                      | -0.34                  |
| $\text{SiH}_3\text{NH}_2 + (\text{NH}_2)_3\text{SiH} \longrightarrow \text{SiH}_3\text{-NH-Si}(\text{NH}_2)_3 + \text{H}_2$ | 0.0                    | 0.40                       | 2.50                          | -0.30                      | -0.50                  |
| $\text{SiH}_3\text{NH}_2 \longrightarrow \text{SiHNH}_2 + \text{H}_2$                                                       | 0.0                    | -                          | 2.59                          | 1.42                       | 1.21                   |
| $\text{SiH}_2(\text{NH}_2)_2 \longrightarrow \text{Si}(\text{NH}_2)_2 + \text{H}_2$                                         | 0.0                    | -                          | 3.03                          | 1.03                       | 0.84                   |
| $\text{NH}_2 + \text{SiH}_3 \longrightarrow \text{SiH}_3\text{NH}_2$                                                        | 0.0                    | -                          | -                             | -                          | -3.89                  |
| $\text{NH}_2 + \text{SiH}_2\text{NH}_2 \longrightarrow \text{SiH}_2(\text{NH}_2)_2$                                         | 0.0                    | -                          | -                             | -                          | -4.12                  |
| $\text{NH}_2 + \text{SiH}(\text{NH}_2)_2 \longrightarrow \text{SiH}(\text{NH}_2)_3$                                         | 0.0                    | -                          | -                             | -                          | -4.27                  |
| $\text{NH}_2 + \text{Si}(\text{NH}_2)_3 \longrightarrow \text{Si}(\text{NH}_2)_4$                                           | 0.0                    | -                          | -                             | -                          | -4.33                  |
| $\text{SiH}_3 + \text{SiH}_3\text{NH} \longrightarrow (\text{SiH}_3)_2\text{NH}$                                            | 0.0                    | -                          | -                             | -                          | -4.18                  |
| $\text{SiH}_3 + (\text{SiH}_3)_2\text{N} \longrightarrow (\text{SiH}_3)_3\text{N}$                                          | 0.0                    | -                          | -                             | -                          | -4.84                  |
| $\text{SiH}_3 + \text{NH}_3 \longrightarrow \text{SiH}_3\text{NH}_3$                                                        | 0.0                    | 0.37                       | 0.62                          | -                          | 1.12                   |
| $\text{NH}_2\text{SiH}_2 + \text{NH}_3 \longrightarrow \text{NH}_2\text{SiH}_2\text{NH}_3$                                  | 0.0                    | 0.40                       | 1.12                          | -                          | 0.99                   |
| $(\text{NH}_2)_2\text{SiH} + \text{NH}_3 \longrightarrow (\text{NH}_2)_2\text{SiHNH}_3$                                     | 0.0                    | 0.29                       | 1.15                          | -                          | 0.85                   |
| $\text{NH}_3\text{SiH}_3 \longrightarrow \text{NH}_2\text{SiH}_3 + \text{H}$                                                | 0.0                    | -                          | 0.27                          | -0.39                      | -0.83                  |
| $\text{NH}_2\text{SiH}_2\text{NH}_3 \longrightarrow (\text{NH}_2)_2\text{SiH}_2 + \text{H}$                                 | 0.0                    | -                          | 0.21                          | -0.57                      | -0.97                  |
| $(\text{NH}_2)_2\text{SiHNH}_3 \longrightarrow (\text{NH}_2)_3\text{SiH} + \text{H}$                                        | 0.0                    | -                          | 0.13                          | -0.58                      | -1.03                  |
| $(\text{NH}_2)_3\text{SiNH}_3 \longrightarrow (\text{NH}_2)_4\text{Si} + \text{H}$                                          | 0.0                    | -                          | 0.15                          | -0.55                      | -0.89                  |
| $\text{SiH}_2 + \text{NH}_3 \longrightarrow \text{SiH}_2\text{-NH}_3$                                                       | 0.0                    | -                          | -                             | -                          | -0.54                  |
| $\text{SiH}_2 + \text{NH}_2\text{SiH}_3 \longrightarrow \text{SiH}_2\text{-NH}_2\text{SiH}_3$                               | 0.0                    | -                          | -                             | -                          | -0.42                  |
| $\text{SiH}_2 + \text{NH}(\text{SiH}_3)_2 \longrightarrow \text{SiH}_2\text{-NH}(\text{SiH}_3)_2$                           | 0.0                    | -                          | -                             | -                          | -0.32                  |
| $\text{SiH}_2\text{-NH}_3 + \text{NH}_3 \longrightarrow \text{NH}_3\text{-SiH}_2\text{-NH}_3$                               | 0.0                    | 0.42                       | -                             | -                          | 0.43                   |
| $\text{SiH}_2\text{-NH}_3 \longrightarrow \text{SiH}_3\text{NH}_2$                                                          | 0.0                    | -                          | 1.44                          | -                          | -1.75                  |
| $\text{SiH}_2\text{-NH}_2\text{SiH}_3 \longrightarrow \text{NH}(\text{SiH}_3)_2$                                            | 0.0                    | -                          | 1.22                          | -                          | -1.93                  |
| $\text{SiH}_2\text{-NH}(\text{SiH}_3)_2 \longrightarrow \text{N}(\text{SiH}_3)_3$                                           | 0.0                    | -                          | 1.05                          | -                          | -2.03                  |
| $\text{NH}_2 + \text{SiH}_4 \longrightarrow \text{NH}_2\text{SiH}_3 + \text{H}$                                             | 0.0                    | 0.36                       | 0.85                          | -0.10                      | -0.47                  |
| $\text{NH}_2 + \text{NH}_2\text{SiH}_3 \longrightarrow (\text{NH}_2)_2\text{SiH}_2 + \text{H}$                              | 0.0                    | 0.30                       | 0.68                          | -0.23                      | -0.61                  |
| $\text{NH}_2 + (\text{NH}_2)_2\text{SiH}_2 \longrightarrow (\text{NH}_2)_3\text{SiH} + \text{H}$                            | 0.0                    | 0.33                       | 0.60                          | -0.35                      | -0.80                  |
| $\text{NH}_2 + (\text{NH}_2)_3\text{SiH} \longrightarrow (\text{NH}_2)_4\text{Si} + \text{H}$                               | 0.0                    | 0.45                       | 0.75                          | -0.36                      | -0.73                  |
| $\text{SiH}_3 + \text{SiH}_4 \longrightarrow \text{SiH}_4 + \text{SiH}_3$                                                   | 0.0                    | 0.52                       | 0.78                          | 0.52                       | 0.02                   |
| $\text{SiH}_3 + \text{NH}_2\text{SiH}_3 \longrightarrow \text{NH}_2\text{SiH}_2 + \text{SiH}_4$                             | 0.0                    | 0.36                       | 0.80                          | 0.35                       | 0.04                   |
| $\text{SiH}_3 + (\text{NH}_2)_2\text{SiH}_2 \longrightarrow (\text{NH}_2)_2\text{SiH} + \text{SiH}_4$                       | 0.0                    | 0.38                       | 0.85                          | 0.46                       | 0.07                   |
| $\text{SiH}_3 + (\text{NH}_2)_3\text{SiH} \longrightarrow (\text{NH}_2)_3\text{Si} + \text{SiH}_4$                          | 0.0                    | 0.42                       | 1.06                          | 0.65                       | 0.20                   |
| $\text{NH}_2 + \text{SiH}_4 \longrightarrow \text{SiH}_3 + \text{NH}_3$                                                     | 0.0                    | 0.34                       | 0.72                          | -0.35                      | -0.67                  |
| $\text{NH}_2 + \text{NH}_2\text{SiH}_3 \longrightarrow \text{NH}_2\text{SiH}_2 + \text{NH}_3$                               | 0.0                    | 0.47                       | 0.80                          | -0.36                      | -0.65                  |
| $\text{NH}_2 + (\text{NH}_2)_2\text{SiH}_2 \longrightarrow (\text{NH}_2)_2\text{SiH} + \text{NH}_3$                         | 0.0                    | 0.34                       | 0.78                          | -0.26                      | -0.57                  |
| $\text{NH}_2 + (\text{NH}_2)_3\text{SiH} \longrightarrow (\text{NH}_2)_3\text{Si} + \text{NH}_3$                            | 0.0                    | 0.45                       | 0.74                          | -0.04                      | -0.45                  |
| $\text{SiH}_4 + \text{H} \longrightarrow \text{SiH}_3 + \text{H}_2$                                                         | 0.0                    | 0.37                       | 0.63                          | -0.17                      | -0.39                  |
| $\text{NH}_2\text{SiH}_3 + \text{H} \longrightarrow \text{NH}_2\text{SiH}_2 + \text{H}_2$                                   | 0.0                    | 0.43                       | 0.58                          | -0.10                      | -0.34                  |
| $(\text{NH}_2)_2\text{SiH}_2 + \text{H} \longrightarrow (\text{NH}_2)_2\text{SiH} + \text{H}_2$                             | 0.0                    | 0.42                       | 0.65                          | -0.03                      | -0.30                  |
| $(\text{NH}_2)_3\text{SiH} + \text{H} \longrightarrow (\text{NH}_2)_3\text{Si} + \text{H}_2$                                | 0.0                    | 0.44                       | 0.64                          | 0.10                       | -0.17                  |

1. M. W. Chase, *Journal of Physical and Chemical Reference Data, Monograph*, 1998, 9, 1–1951
